# Supplementary material
Source: publisher figshare collection journal article supplement (https://gsajournals.figshare.com/ndownloader/files/25736795)
Supplement: Supplementary file 1 [file 25736795]

ctg14561	maker	gene	5721	50218	.	+	.	Alias=maker-ctg14561-snap-gene-0.0;ID=Cnem141080;Name=Cnem141080
ctg14561	maker	mRNA	5721	50218	.	+	.	_QI=88|0.77|0.8|1|0.22|0.5|10|689|424;ID=Cnem141080-RA;_AED=0.23;Alias=maker-ctg14561-snap-gene-0.0-mRNA-1;Parent=Cnem141080;_eAED=0.23;Name=Cnem141080-RA
ctg14561	maker	exon	24152	24289	.	+	.	Parent=Cnem141080-RA;ID=Cnem141080-RA:exon:161915
ctg14561	maker	exon	5721	5908	.	+	.	ID=Cnem141080-RA:exon:161909;Parent=Cnem141080-RA
ctg14561	maker	exon	32073	32174	.	+	.	Parent=Cnem141080-RA;ID=Cnem141080-RA:exon:161916
ctg14561	maker	exon	49389	50218	.	+	.	ID=Cnem141080-RA:exon:161918;Parent=Cnem141080-RA
ctg14561	maker	exon	14557	14678	.	+	.	ID=Cnem141080-RA:exon:161912;Parent=Cnem141080-RA
ctg14561	maker	exon	39678	39785	.	+	.	Parent=Cnem141080-RA;ID=Cnem141080-RA:exon:161917
ctg14561	maker	exon	6789	6956	.	+	.	Parent=Cnem141080-RA;ID=Cnem141080-RA:exon:161910
ctg14561	maker	exon	19214	19331	.	+	.	Parent=Cnem141080-RA;ID=Cnem141080-RA:exon:161913
ctg14561	maker	exon	12658	12749	.	+	.	ID=Cnem141080-RA:exon:161911;Parent=Cnem141080-RA
ctg14561	maker	exon	21033	21218	.	+	.	Parent=Cnem141080-RA;ID=Cnem141080-RA:exon:161914
ctg14561	maker	CDS	21033	21218	.	+	0	Parent=Cnem141080-RA;ID=Cnem141080-RA:cds_dup4
ctg14561	maker	CDS	39678	39785	.	+	0	ID=Cnem141080-RA:cds_dup7;Parent=Cnem141080-RA
ctg14561	maker	CDS	14557	14678	.	+	0	ID=Cnem141080-RA:cds_dup2;Parent=Cnem141080-RA
ctg14561	maker	CDS	49389	49529	.	+	0	ID=Cnem141080-RA:cds_dup8;Parent=Cnem141080-RA
ctg14561	maker	CDS	12658	12749	.	+	2	Parent=Cnem141080-RA;ID=Cnem141080-RA:cds_dup1
ctg14561	maker	CDS	6789	6956	.	+	2	Parent=Cnem141080-RA;ID=Cnem141080-RA:cds_dup0
ctg14561	maker	CDS	32073	32174	.	+	0	ID=Cnem141080-RA:cds_dup6;Parent=Cnem141080-RA
ctg14561	maker	CDS	19214	19331	.	+	1	ID=Cnem141080-RA:cds_dup3;Parent=Cnem141080-RA
ctg14561	maker	CDS	5809	5908	.	+	0	ID=Cnem141080-RA:cds;Parent=Cnem141080-RA
ctg14561	maker	CDS	24152	24289	.	+	0	ID=Cnem141080-RA:cds_dup5;Parent=Cnem141080-RA
ctg28325	maker	gene	5807	7748	.	+	.	ID=Cnem166454;Alias=maker-ctg28325-snap-gene-0.1;Name=Cnem166454
ctg28325	maker	mRNA	5807	7748	.	+	.	_eAED=0.04;Name=Cnem166454-RA;Parent=Cnem166454;Alias=maker-ctg28325-snap-gene-0.1-mRNA-1;_AED=0.25;ID=Cnem166454-RA;_QI=0|0|0|0.83|0.4|0.33|6|0|556
ctg28325	maker	CDS	6482	6692	.	+	1	Parent=Cnem166454-RA;ID=Cnem166454-RA:cds_dup12
ctg28325	maker	CDS	7485	7748	.	+	0	ID=Cnem166454-RA:cds_dup15;Parent=Cnem166454-RA
ctg28325	maker	CDS	7100	7475	.	+	1	Parent=Cnem166454-RA;ID=Cnem166454-RA:cds_dup14
ctg28325	maker	CDS	5807	5905	.	+	0	ID=Cnem166454-RA:cds;Parent=Cnem166454-RA
ctg28325	maker	CDS	6057	6439	.	+	0	ID=Cnem166454-RA:cds_dup11;Parent=Cnem166454-RA
ctg28325	maker	CDS	6726	7063	.	+	0	Parent=Cnem166454-RA;ID=Cnem166454-RA:cds_dup13
ctg28325	maker	exon	6482	6692	.	+	.	ID=Cnem166454-RA:exon:58240;Parent=Cnem166454-RA
ctg28325	maker	exon	6057	6439	.	+	.	ID=Cnem166454-RA:exon:58239;Parent=Cnem166454-RA
ctg28325	maker	exon	5807	5905	.	+	.	ID=Cnem166454-RA:exon:58238;Parent=Cnem166454-RA
ctg28325	maker	exon	7485	7748	.	+	.	Parent=Cnem166454-RA;ID=Cnem166454-RA:exon:58243
ctg28325	maker	exon	6726	7063	.	+	.	ID=Cnem166454-RA:exon:58241;Parent=Cnem166454-RA
ctg28325	maker	exon	7100	7475	.	+	.	Parent=Cnem166454-RA;ID=Cnem166454-RA:exon:58242
contig_13742	maker	gene	94512	104333	.	+	.	ID=Cnem093830;Alias=maker-contig_13742-snap-gene-0.136;Name=Cnem093830
contig_13742	maker	mRNA	94512	104333	.	+	.	_eAED=0.04;Name=Cnem093830-RA;Parent=Cnem093830;Alias=maker-contig_13742-snap-gene-0.136-mRNA-1;_AED=0.04;ID=Cnem093830-RA;_QI=0|0.33|0.25|0.75|0.33|0.75|4|799|841
contig_13742	maker	CDS	99492	99567	.	+	0	Parent=Cnem093830-RA;ID=Cnem093830-RA:cds_dup21
contig_13742	maker	CDS	96719	97363	.	+	0	Parent=Cnem093830-RA;ID=Cnem093830-RA:cds_dup20
contig_13742	maker	CDS	101838	103534	.	+	2	ID=Cnem093830-RA:cds_dup22;Parent=Cnem093830-RA
contig_13742	maker	CDS	94512	94619	.	+	0	ID=Cnem093830-RA:cds;Parent=Cnem093830-RA
contig_13742	maker	exon	94512	94619	.	+	.	Parent=Cnem093830-RA;ID=Cnem093830-RA:exon:229241
contig_13742	maker	exon	96719	97363	.	+	.	Parent=Cnem093830-RA;ID=Cnem093830-RA:exon:229242
contig_13742	maker	exon	101838	104333	.	+	.	Parent=Cnem093830-RA;ID=Cnem093830-RA:exon:229244
contig_13742	maker	exon	99492	99567	.	+	.	Parent=Cnem093830-RA;ID=Cnem093830-RA:exon:229243
contig_13742	maker	gene	268765	271597	.	+	.	Name=Cnem093839;ID=Cnem093839;Alias=maker-contig_13742-snap-gene-0.142
contig_13742	maker	mRNA	268765	271597	.	+	.	Parent=Cnem093839;Name=Cnem093839-RA;_eAED=0.07;_QI=0|0|0|1|0.2|0.33|6|0|795;Alias=maker-contig_13742-snap-gene-0.142-mRNA-1;_AED=0.14;ID=Cnem093839-RA
contig_13742	maker	CDS	270015	270746	.	+	0	ID=Cnem093839-RA:cds_dup26;Parent=Cnem093839-RA
contig_13742	maker	CDS	268765	269007	.	+	0	Parent=Cnem093839-RA;ID=Cnem093839-RA:cds
contig_13742	maker	CDS	269015	269248	.	+	0	ID=Cnem093839-RA:cds_dup23;Parent=Cnem093839-RA
contig_13742	maker	CDS	270899	271597	.	+	0	ID=Cnem093839-RA:cds_dup27;Parent=Cnem093839-RA
contig_13742	maker	CDS	269513	269785	.	+	0	ID=Cnem093839-RA:cds_dup25;Parent=Cnem093839-RA
contig_13742	maker	CDS	269266	269472	.	+	0	ID=Cnem093839-RA:cds_dup24;Parent=Cnem093839-RA
contig_13742	maker	exon	269266	269472	.	+	.	ID=Cnem093839-RA:exon:229247;Parent=Cnem093839-RA
contig_13742	maker	exon	268765	269007	.	+	.	Parent=Cnem093839-RA;ID=Cnem093839-RA:exon:229245
contig_13742	maker	exon	270899	271597	.	+	.	ID=Cnem093839-RA:exon:229250;Parent=Cnem093839-RA
contig_13742	maker	exon	269015	269248	.	+	.	Parent=Cnem093839-RA;ID=Cnem093839-RA:exon:229246
contig_13742	maker	exon	270015	270746	.	+	.	ID=Cnem093839-RA:exon:229249;Parent=Cnem093839-RA
contig_13742	maker	exon	269513	269785	.	+	.	Parent=Cnem093839-RA;ID=Cnem093839-RA:exon:229248
contig_13742	maker	gene	38934	52459	.	+	.	ID=Cnem093827;Alias=maker-contig_13742-augustus-gene-0.121;Name=Cnem093827
contig_13742	maker	mRNA	38934	52459	.	+	.	_AED=0.36;ID=Cnem093827-RA;Alias=maker-contig_13742-augustus-gene-0.121-mRNA-1;_QI=69|0.5|0.54|0.90|0.8|0.90|11|0|964;_eAED=0.16;Name=Cnem093827-RA;Parent=Cnem093827
contig_13742	maker	exon	49231	49307	.	+	.	ID=Cnem093827-RA:exon:229258;Parent=Cnem093827-RA
contig_13742	maker	exon	40382	40451	.	+	.	ID=Cnem093827-RA:exon:229252;Parent=Cnem093827-RA
contig_13742	maker	exon	44449	44523	.	+	.	ID=Cnem093827-RA:exon:229255;Parent=Cnem093827-RA
contig_13742	maker	exon	50199	51125	.	+	.	Parent=Cnem093827-RA;ID=Cnem093827-RA:exon:229259
contig_13742	maker	exon	51195	51638	.	+	.	Parent=Cnem093827-RA;ID=Cnem093827-RA:exon:229260
contig_13742	maker	exon	46870	47010	.	+	.	ID=Cnem093827-RA:exon:229257;Parent=Cnem093827-RA
contig_13742	maker	exon	43196	43270	.	+	.	Parent=Cnem093827-RA;ID=Cnem093827-RA:exon:229254
contig_13742	maker	exon	51724	52459	.	+	.	ID=Cnem093827-RA:exon:229261;Parent=Cnem093827-RA
contig_13742	maker	exon	42439	42526	.	+	.	Parent=Cnem093827-RA;ID=Cnem093827-RA:exon:229253
contig_13742	maker	exon	38934	39168	.	+	.	ID=Cnem093827-RA:exon:229251;Parent=Cnem093827-RA
contig_13742	maker	exon	44692	44787	.	+	.	ID=Cnem093827-RA:exon:229256;Parent=Cnem093827-RA
contig_13742	maker	CDS	50199	51125	.	+	1	Parent=Cnem093827-RA;ID=Cnem093827-RA:cds_dup35
contig_13742	maker	CDS	39003	39168	.	+	0	Parent=Cnem093827-RA;ID=Cnem093827-RA:cds
contig_13742	maker	CDS	46870	47010	.	+	0	ID=Cnem093827-RA:cds_dup33;Parent=Cnem093827-RA
contig_13742	maker	CDS	42439	42526	.	+	1	Parent=Cnem093827-RA;ID=Cnem093827-RA:cds_dup29
contig_13742	maker	CDS	40382	40451	.	+	2	ID=Cnem093827-RA:cds_dup28;Parent=Cnem093827-RA
contig_13742	maker	CDS	49231	49307	.	+	0	Parent=Cnem093827-RA;ID=Cnem093827-RA:cds_dup34
contig_13742	maker	CDS	43196	43270	.	+	0	Parent=Cnem093827-RA;ID=Cnem093827-RA:cds_dup30
contig_13742	maker	CDS	44449	44523	.	+	0	Parent=Cnem093827-RA;ID=Cnem093827-RA:cds_dup31
contig_13742	maker	CDS	51195	51638	.	+	1	ID=Cnem093827-RA:cds_dup36;Parent=Cnem093827-RA
contig_13742	maker	CDS	44692	44787	.	+	0	Parent=Cnem093827-RA;ID=Cnem093827-RA:cds_dup32
contig_13742	maker	CDS	51724	52459	.	+	1	ID=Cnem093827-RA:cds_dup37;Parent=Cnem093827-RA
contig_13742	maker	gene	52538	56449	.	+	.	Alias=maker-contig_13742-augustus-gene-0.122;ID=Cnem093828;Name=Cnem093828
contig_13742	maker	mRNA	52538	56449	.	+	.	_AED=0.37;ID=Cnem093828-RA;Alias=maker-contig_13742-augustus-gene-0.122-mRNA-1;_QI=0|0.66|0.75|1|0|0.25|4|764|288;Name=Cnem093828-RA;_eAED=0.28;Parent=Cnem093828
contig_13742	maker	exon	54227	54309	.	+	.	Parent=Cnem093828-RA;ID=Cnem093828-RA:exon:229263
contig_13742	maker	exon	55832	56449	.	+	.	Parent=Cnem093828-RA;ID=Cnem093828-RA:exon:229265
contig_13742	maker	exon	55550	55791	.	+	.	ID=Cnem093828-RA:exon:229264;Parent=Cnem093828-RA
contig_13742	maker	exon	52538	53225	.	+	.	Parent=Cnem093828-RA;ID=Cnem093828-RA:exon:229262
contig_13742	maker	CDS	54227	54309	.	+	2	ID=Cnem093828-RA:cds_dup38;Parent=Cnem093828-RA
contig_13742	maker	CDS	52538	53225	.	+	0	ID=Cnem093828-RA:cds;Parent=Cnem093828-RA
contig_13742	maker	CDS	55550	55645	.	+	0	ID=Cnem093828-RA:cds_dup39;Parent=Cnem093828-RA
contig_13742	maker	gene	70136	77639	.	-	.	Name=Cnem093829;ID=Cnem093829;Alias=maker-contig_13742-augustus-gene-0.130
contig_13742	maker	mRNA	70136	77639	.	-	.	Name=Cnem093829-RA;_eAED=0.14;Parent=Cnem093829;_AED=0.14;ID=Cnem093829-RA;Alias=maker-contig_13742-augustus-gene-0.130-mRNA-1;_QI=160|1|1|1|0|0|3|549|280
contig_13742	maker	CDS	70685	70977	.	-	2	ID=Cnem093829-RA:cds_dup41;Parent=Cnem093829-RA
contig_13742	maker	CDS	74596	75145	.	-	0	Parent=Cnem093829-RA;ID=Cnem093829-RA:cds
contig_13742	maker	exon	74596	75167	.	-	.	ID=Cnem093829-RA:exon:229279;Parent=Cnem093829-RA
contig_13742	maker	exon	70136	70977	.	-	.	ID=Cnem093829-RA:exon:229280;Parent=Cnem093829-RA
contig_13742	maker	exon	77502	77639	.	-	.	ID=Cnem093829-RA:exon:229278;Parent=Cnem093829-RA
contig_13742	maker	gene	21793	22583	.	+	.	ID=Cnem093826;Alias=maker-contig_13742-snap-gene-0.134;Name=Cnem093826
contig_13742	maker	mRNA	21793	22583	.	+	.	Parent=Cnem093826;_eAED=0.77;Name=Cnem093826-RA;_QI=64|0|0|1|0|0|2|0|223;_AED=0.41;Alias=maker-contig_13742-snap-gene-0.134-mRNA-1;ID=Cnem093826-RA
contig_13742	maker	exon	21793	22175	.	+	.	Parent=Cnem093826-RA;ID=Cnem093826-RA:exon:229296
contig_13742	maker	exon	22234	22583	.	+	.	ID=Cnem093826-RA:exon:229297;Parent=Cnem093826-RA
contig_13742	maker	CDS	21857	22175	.	+	0	ID=Cnem093826-RA:cds;Parent=Cnem093826-RA
contig_13742	maker	CDS	22234	22583	.	+	2	ID=Cnem093826-RA:cds_dup47;Parent=Cnem093826-RA
ctg12309	maker	gene	51299	56606	.	+	.	ID=Cnem139450;Alias=maker-ctg12309-augustus-gene-0.4;Name=Cnem139450
ctg12309	maker	mRNA	51299	56606	.	+	.	_AED=0.26;ID=Cnem139450-RA;Alias=maker-ctg12309-augustus-gene-0.4-mRNA-1;_QI=0|0|0|0.5|0.8|0.66|6|0|785;_eAED=0.17;Name=Cnem139450-RA;Parent=Cnem139450
ctg12309	maker	exon	52697	53508	.	+	.	Parent=Cnem139450-RA;ID=Cnem139450-RA:exon:35657
ctg12309	maker	exon	51647	52525	.	+	.	Parent=Cnem139450-RA;ID=Cnem139450-RA:exon:35656
ctg12309	maker	exon	53590	53787	.	+	.	Parent=Cnem139450-RA;ID=Cnem139450-RA:exon:35658
ctg12309	maker	exon	54513	54633	.	+	.	ID=Cnem139450-RA:exon:35659;Parent=Cnem139450-RA
ctg12309	maker	exon	51299	51431	.	+	.	ID=Cnem139450-RA:exon:35655;Parent=Cnem139450-RA
ctg12309	maker	exon	56392	56606	.	+	.	ID=Cnem139450-RA:exon:35660;Parent=Cnem139450-RA
ctg12309	maker	CDS	56392	56606	.	+	2	ID=Cnem139450-RA:cds_dup52;Parent=Cnem139450-RA
ctg12309	maker	CDS	51299	51431	.	+	0	ID=Cnem139450-RA:cds;Parent=Cnem139450-RA
ctg12309	maker	CDS	53590	53787	.	+	0	ID=Cnem139450-RA:cds_dup50;Parent=Cnem139450-RA
ctg12309	maker	CDS	54513	54633	.	+	0	ID=Cnem139450-RA:cds_dup51;Parent=Cnem139450-RA
ctg12309	maker	CDS	51647	52525	.	+	2	Parent=Cnem139450-RA;ID=Cnem139450-RA:cds_dup48
ctg12309	maker	CDS	52697	53508	.	+	2	ID=Cnem139450-RA:cds_dup49;Parent=Cnem139450-RA
ctg12309	maker	gene	8343	23898	.	+	.	Name=Cnem139446;ID=Cnem139446;Alias=maker-ctg12309-snap-gene-0.66
ctg12309	maker	mRNA	8343	23898	.	+	.	_QI=0|0.28|0.12|0.87|0.42|0.62|8|0|488;_AED=0.30;Alias=maker-ctg12309-snap-gene-0.66-mRNA-1;ID=Cnem139446-RA;Parent=Cnem139446;Name=Cnem139446-RA;_eAED=0.58
ctg12309	maker	exon	23835	23898	.	+	.	Parent=Cnem139446-RA;ID=Cnem139446-RA:exon:35674
ctg12309	maker	exon	8343	8656	.	+	.	Parent=Cnem139446-RA;ID=Cnem139446-RA:exon:35667
ctg12309	maker	exon	8714	8987	.	+	.	Parent=Cnem139446-RA;ID=Cnem139446-RA:exon:35668
ctg12309	maker	exon	21516	21771	.	+	.	Parent=Cnem139446-RA;ID=Cnem139446-RA:exon:35673
ctg12309	maker	exon	10069	10177	.	+	.	ID=Cnem139446-RA:exon:35669;Parent=Cnem139446-RA
ctg12309	maker	exon	15789	15924	.	+	.	ID=Cnem139446-RA:exon:35672;Parent=Cnem139446-RA
ctg12309	maker	exon	13381	13461	.	+	.	ID=Cnem139446-RA:exon:35670;Parent=Cnem139446-RA
ctg12309	maker	exon	14609	14841	.	+	.	ID=Cnem139446-RA:exon:35671;Parent=Cnem139446-RA
ctg12309	maker	CDS	23835	23898	.	+	1	Parent=Cnem139446-RA;ID=Cnem139446-RA:cds_dup62
ctg12309	maker	CDS	8714	8987	.	+	1	Parent=Cnem139446-RA;ID=Cnem139446-RA:cds_dup56
ctg12309	maker	CDS	10069	10177	.	+	0	ID=Cnem139446-RA:cds_dup57;Parent=Cnem139446-RA
ctg12309	maker	CDS	14609	14841	.	+	2	ID=Cnem139446-RA:cds_dup59;Parent=Cnem139446-RA
ctg12309	maker	CDS	13381	13461	.	+	2	Parent=Cnem139446-RA;ID=Cnem139446-RA:cds_dup58
ctg12309	maker	CDS	8343	8656	.	+	0	ID=Cnem139446-RA:cds;Parent=Cnem139446-RA
ctg12309	maker	CDS	15789	15924	.	+	0	ID=Cnem139446-RA:cds_dup60;Parent=Cnem139446-RA
ctg12309	maker	CDS	21516	21771	.	+	2	ID=Cnem139446-RA:cds_dup61;Parent=Cnem139446-RA
ctg12309	maker	gene	44385	50714	.	-	.	ID=Cnem139449;Alias=augustus-ctg12309-processed-gene-0.26;Name=Cnem139449
ctg12309	maker	mRNA	44385	50714	.	-	.	_QI=0|0|0|0.4|1|1|5|0|720;ID=Cnem139449-RA;_AED=0.38;Alias=augustus-ctg12309-processed-gene-0.26-mRNA-1;Parent=Cnem139449;Name=Cnem139449-RA;_eAED=0.33
ctg12309	maker	exon	47624	48362	.	-	.	ID=Cnem139449-RA:exon:35679;Parent=Cnem139449-RA
ctg12309	maker	exon	46863	47348	.	-	.	ID=Cnem139449-RA:exon:35678;Parent=Cnem139449-RA
ctg12309	maker	exon	49429	49529	.	-	.	Parent=Cnem139449-RA;ID=Cnem139449-RA:exon:35680
ctg12309	maker	exon	50367	50714	.	-	.	ID=Cnem139449-RA:exon:35681;Parent=Cnem139449-RA
ctg12309	maker	exon	44385	44873	.	-	.	ID=Cnem139449-RA:exon:35677;Parent=Cnem139449-RA
ctg12309	maker	CDS	47624	48362	.	-	1	ID=Cnem139449-RA:cds_dup64;Parent=Cnem139449-RA
ctg12309	maker	CDS	50367	50714	.	-	0	Parent=Cnem139449-RA;ID=Cnem139449-RA:cds
ctg12309	maker	CDS	46863	47348	.	-	0	ID=Cnem139449-RA:cds_dup65;Parent=Cnem139449-RA
ctg12309	maker	CDS	44385	44873	.	-	0	Parent=Cnem139449-RA;ID=Cnem139449-RA:cds_dup66
ctg12309	maker	CDS	49429	49529	.	-	0	ID=Cnem139449-RA:cds_dup63;Parent=Cnem139449-RA
tig02187878	maker	gene	2814	9168	.	-	.	Name=Cnem110590;Alias=maker-tig02187878-augustus-gene-0.1;ID=Cnem110590
tig02187878	maker	mRNA	2814	9168	.	-	.	_QI=0|0|0|0.85|0.83|0.85|7|0|1903;ID=Cnem110590-RA;_AED=0.35;Alias=maker-tig02187878-augustus-gene-0.1-mRNA-1;Parent=Cnem110590;Name=Cnem110590-RA;_eAED=-0.36
tig02187878	maker	CDS	2814	3518	.	-	0	Parent=Cnem110590-RA;ID=Cnem110590-RA:cds_dup76
tig02187878	maker	CDS	5810	6295	.	-	0	ID=Cnem110590-RA:cds_dup73;Parent=Cnem110590-RA
tig02187878	maker	CDS	6401	7414	.	-	0	Parent=Cnem110590-RA;ID=Cnem110590-RA:cds_dup72
tig02187878	maker	CDS	8539	9168	.	-	0	ID=Cnem110590-RA:cds;Parent=Cnem110590-RA
tig02187878	maker	CDS	7481	8446	.	-	0	ID=Cnem110590-RA:cds_dup71;Parent=Cnem110590-RA
tig02187878	maker	CDS	4635	5600	.	-	0	Parent=Cnem110590-RA;ID=Cnem110590-RA:cds_dup74
tig02187878	maker	CDS	3624	4568	.	-	0	Parent=Cnem110590-RA;ID=Cnem110590-RA:cds_dup75
tig02187878	maker	exon	6401	7414	.	-	.	ID=Cnem110590-RA:exon:58177;Parent=Cnem110590-RA
tig02187878	maker	exon	5810	6295	.	-	.	ID=Cnem110590-RA:exon:58176;Parent=Cnem110590-RA
tig02187878	maker	exon	4635	5600	.	-	.	Parent=Cnem110590-RA;ID=Cnem110590-RA:exon:58175
tig02187878	maker	exon	7481	8446	.	-	.	ID=Cnem110590-RA:exon:58178;Parent=Cnem110590-RA
tig02187878	maker	exon	3624	4568	.	-	.	Parent=Cnem110590-RA;ID=Cnem110590-RA:exon:58174
tig02187878	maker	exon	2814	3518	.	-	.	Parent=Cnem110590-RA;ID=Cnem110590-RA:exon:58173
tig02187878	maker	exon	8539	9168	.	-	.	Parent=Cnem110590-RA;ID=Cnem110590-RA:exon:58179
tig02187878	maker	gene	226279	227396	.	+	.	ID=Cnem110605;Alias=maker-tig02187878-snap-gene-0.102;Name=Cnem110605
tig02187878	maker	mRNA	226279	227396	.	+	.	Alias=maker-tig02187878-snap-gene-0.102-mRNA-1;_AED=0.33;ID=Cnem110605-RA;_QI=0|0|0|1|0|0|3|0|289;Name=Cnem110605-RA;_eAED=0.37;Parent=Cnem110605
tig02187878	maker	exon	226497	226722	.	+	.	ID=Cnem110605-RA:exon:58203;Parent=Cnem110605-RA
tig02187878	maker	exon	226279	226461	.	+	.	ID=Cnem110605-RA:exon:58202;Parent=Cnem110605-RA
tig02187878	maker	exon	226936	227396	.	+	.	Parent=Cnem110605-RA;ID=Cnem110605-RA:exon:58204
tig02187878	maker	CDS	226279	226461	.	+	0	Parent=Cnem110605-RA;ID=Cnem110605-RA:cds
tig02187878	maker	CDS	226936	227396	.	+	2	ID=Cnem110605-RA:cds_dup81;Parent=Cnem110605-RA
tig02187878	maker	CDS	226497	226722	.	+	0	ID=Cnem110605-RA:cds_dup80;Parent=Cnem110605-RA
ctg10699	maker	gene	84880	97281	.	+	.	Name=Cnem125961;ID=Cnem125961;Alias=maker-ctg10699-augustus-gene-0.45
ctg10699	maker	mRNA	84880	97281	.	+	.	Parent=Cnem125961;Name=Cnem125961-RA;_eAED=0.46;_QI=0|0|0|0.62|0.71|0.87|8|0|513;ID=Cnem125961-RA;_AED=0.29;Alias=maker-ctg10699-augustus-gene-0.45-mRNA-1
ctg10699	maker	exon	84880	84998	.	+	.	ID=Cnem125961-RA:exon:255544;Parent=Cnem125961-RA
ctg10699	maker	exon	85061	85217	.	+	.	ID=Cnem125961-RA:exon:255545;Parent=Cnem125961-RA
ctg10699	maker	exon	85559	85726	.	+	.	ID=Cnem125961-RA:exon:255546;Parent=Cnem125961-RA
ctg10699	maker	exon	94364	94533	.	+	.	Parent=Cnem125961-RA;ID=Cnem125961-RA:exon:255550
ctg10699	maker	exon	88317	88809	.	+	.	Parent=Cnem125961-RA;ID=Cnem125961-RA:exon:255547
ctg10699	maker	exon	97098	97281	.	+	.	Parent=Cnem125961-RA;ID=Cnem125961-RA:exon:255551
ctg10699	maker	exon	92473	92519	.	+	.	ID=Cnem125961-RA:exon:255549;Parent=Cnem125961-RA
ctg10699	maker	exon	91995	92198	.	+	.	Parent=Cnem125961-RA;ID=Cnem125961-RA:exon:255548
ctg10699	maker	CDS	85559	85726	.	+	0	ID=Cnem125961-RA:cds_dup88;Parent=Cnem125961-RA
ctg10699	maker	CDS	85061	85217	.	+	1	ID=Cnem125961-RA:cds_dup87;Parent=Cnem125961-RA
ctg10699	maker	CDS	88317	88809	.	+	0	ID=Cnem125961-RA:cds_dup89;Parent=Cnem125961-RA
ctg10699	maker	CDS	94364	94533	.	+	0	Parent=Cnem125961-RA;ID=Cnem125961-RA:cds_dup92
ctg10699	maker	CDS	84880	84998	.	+	0	Parent=Cnem125961-RA;ID=Cnem125961-RA:cds
ctg10699	maker	CDS	92473	92519	.	+	2	Parent=Cnem125961-RA;ID=Cnem125961-RA:cds_dup91
ctg10699	maker	CDS	91995	92198	.	+	2	Parent=Cnem125961-RA;ID=Cnem125961-RA:cds_dup90
ctg10699	maker	CDS	97098	97281	.	+	1	ID=Cnem125961-RA:cds_dup93;Parent=Cnem125961-RA
ctg10699	maker	gene	32725	83218	.	-	.	Name=Cnem125960;ID=Cnem125960;Alias=maker-ctg10699-snap-gene-0.1
ctg10699	maker	mRNA	32725	83218	.	-	.	Alias=maker-ctg10699-snap-gene-0.1-mRNA-1;_AED=0.26;ID=Cnem125960-RA;_QI=35|0.75|0.64|0.94|0.37|0.41|17|659|742;Name=Cnem125960-RA;_eAED=0.26;Parent=Cnem125960
ctg10699	maker	exon	56361	56476	.	-	.	ID=Cnem125960-RA:exon:255564;Parent=Cnem125960-RA
ctg10699	maker	exon	45287	45405	.	-	.	ID=Cnem125960-RA:exon:255567;Parent=Cnem125960-RA
ctg10699	maker	exon	40496	40562	.	-	.	ID=Cnem125960-RA:exon:255569;Parent=Cnem125960-RA
ctg10699	maker	exon	58978	59029	.	-	.	ID=Cnem125960-RA:exon:255563;Parent=Cnem125960-RA
ctg10699	maker	exon	74414	74516	.	-	.	ID=Cnem125960-RA:exon:255558;Parent=Cnem125960-RA
ctg10699	maker	exon	64109	64298	.	-	.	ID=Cnem125960-RA:exon:255561;Parent=Cnem125960-RA
ctg10699	maker	exon	38797	38943	.	-	.	ID=Cnem125960-RA:exon:255570;Parent=Cnem125960-RA
ctg10699	maker	exon	61501	61618	.	-	.	ID=Cnem125960-RA:exon:255562;Parent=Cnem125960-RA
ctg10699	maker	exon	32725	33480	.	-	.	Parent=Cnem125960-RA;ID=Cnem125960-RA:exon:255572
ctg10699	maker	exon	36050	36117	.	-	.	Parent=Cnem125960-RA;ID=Cnem125960-RA:exon:255571
ctg10699	maker	exon	66779	66968	.	-	.	ID=Cnem125960-RA:exon:255560;Parent=Cnem125960-RA
ctg10699	maker	exon	41481	41557	.	-	.	Parent=Cnem125960-RA;ID=Cnem125960-RA:exon:255568
ctg10699	maker	exon	73209	73307	.	-	.	Parent=Cnem125960-RA;ID=Cnem125960-RA:exon:255559
ctg10699	maker	exon	52862	53061	.	-	.	Parent=Cnem125960-RA;ID=Cnem125960-RA:exon:255565
ctg10699	maker	exon	77127	77338	.	-	.	Parent=Cnem125960-RA;ID=Cnem125960-RA:exon:255557
ctg10699	maker	exon	50827	50974	.	-	.	ID=Cnem125960-RA:exon:255566;Parent=Cnem125960-RA
ctg10699	maker	exon	82958	83218	.	-	.	Parent=Cnem125960-RA;ID=Cnem125960-RA:exon:255556
ctg10699	maker	CDS	74414	74516	.	-	0	ID=Cnem125960-RA:cds_dup96;Parent=Cnem125960-RA
ctg10699	maker	CDS	40496	40562	.	-	1	ID=Cnem125960-RA:cds_dup107;Parent=Cnem125960-RA
ctg10699	maker	CDS	66779	66968	.	-	2	ID=Cnem125960-RA:cds_dup98;Parent=Cnem125960-RA
ctg10699	maker	CDS	45287	45405	.	-	2	ID=Cnem125960-RA:cds_dup105;Parent=Cnem125960-RA
ctg10699	maker	CDS	64109	64298	.	-	1	Parent=Cnem125960-RA;ID=Cnem125960-RA:cds_dup99
ctg10699	maker	CDS	36050	36117	.	-	0	Parent=Cnem125960-RA;ID=Cnem125960-RA:cds_dup109
ctg10699	maker	CDS	61501	61618	.	-	0	Parent=Cnem125960-RA;ID=Cnem125960-RA:cds_dup100
ctg10699	maker	CDS	41481	41557	.	-	0	Parent=Cnem125960-RA;ID=Cnem125960-RA:cds_dup106
ctg10699	maker	CDS	33384	33480	.	-	1	ID=Cnem125960-RA:cds_dup110;Parent=Cnem125960-RA
ctg10699	maker	CDS	50827	50974	.	-	0	ID=Cnem125960-RA:cds_dup104;Parent=Cnem125960-RA
ctg10699	maker	CDS	77127	77338	.	-	2	ID=Cnem125960-RA:cds_dup95;Parent=Cnem125960-RA
ctg10699	maker	CDS	38797	38943	.	-	0	ID=Cnem125960-RA:cds_dup108;Parent=Cnem125960-RA
ctg10699	maker	CDS	82958	83183	.	-	0	Parent=Cnem125960-RA;ID=Cnem125960-RA:cds
ctg10699	maker	CDS	73209	73307	.	-	2	ID=Cnem125960-RA:cds_dup97;Parent=Cnem125960-RA
ctg10699	maker	CDS	58978	59029	.	-	2	Parent=Cnem125960-RA;ID=Cnem125960-RA:cds_dup101
ctg10699	maker	CDS	52862	53061	.	-	2	Parent=Cnem125960-RA;ID=Cnem125960-RA:cds_dup103
ctg10699	maker	CDS	56361	56476	.	-	1	ID=Cnem125960-RA:cds_dup102;Parent=Cnem125960-RA
ctg5692	maker	gene	1663	2753	.	+	.	ID=Cnem132476;Alias=snap-ctg5692-processed-gene-0.10;Name=Cnem132476
ctg5692	maker	mRNA	1663	2753	.	+	.	_eAED=0.26;Name=Cnem132476-RA;Parent=Cnem132476;_AED=0.04;ID=Cnem132476-RA;Alias=snap-ctg5692-processed-gene-0.10-mRNA-1;_QI=0|0|0|1|1|1|2|0|355
ctg5692	maker	CDS	1998	2753	.	+	0	Parent=Cnem132476-RA;ID=Cnem132476-RA:cds_dup116
ctg5692	maker	CDS	1663	1974	.	+	0	ID=Cnem132476-RA:cds;Parent=Cnem132476-RA
ctg5692	maker	exon	1663	1974	.	+	.	ID=Cnem132476-RA:exon:386491;Parent=Cnem132476-RA
ctg5692	maker	exon	1998	2753	.	+	.	ID=Cnem132476-RA:exon:386492;Parent=Cnem132476-RA
tig00396695	maker	gene	262232	266012	.	-	.	ID=Cnem057844;Alias=snap-tig00396695-processed-gene-0.152;Name=Cnem057844
tig00396695	maker	mRNA	262232	266012	.	-	.	Name=Cnem057844-RA;_eAED=0.50;Parent=Cnem057844;_AED=0.26;Alias=snap-tig00396695-processed-gene-0.152-mRNA-1;ID=Cnem057844-RA;_QI=0|0|0|0.66|1|1|3|0|299
tig00396695	maker	CDS	265973	266012	.	-	0	Parent=Cnem057844-RA;ID=Cnem057844-RA:cds
tig00396695	maker	CDS	263060	263220	.	-	2	Parent=Cnem057844-RA;ID=Cnem057844-RA:cds_dup248341
tig00396695	maker	CDS	262232	262930	.	-	0	Parent=Cnem057844-RA;ID=Cnem057844-RA:cds_dup248342
tig00396695	maker	exon	263060	263220	.	-	.	ID=Cnem057844-RA:exon:228142;Parent=Cnem057844-RA
tig00396695	maker	exon	262232	262930	.	-	.	Parent=Cnem057844-RA;ID=Cnem057844-RA:exon:228141
tig00396695	maker	exon	265973	266012	.	-	.	ID=Cnem057844-RA:exon:228143;Parent=Cnem057844-RA
tig00396695	maker	gene	274834	275229	.	+	.	Name=Cnem057846;Alias=snap-tig00396695-processed-gene-0.105;ID=Cnem057846
tig00396695	maker	mRNA	274834	275229	.	+	.	_QI=0|-1|0|1|-1|1|1|0|131;_AED=0.49;Alias=snap-tig00396695-processed-gene-0.105-mRNA-1;ID=Cnem057846-RA;Parent=Cnem057846;Name=Cnem057846-RA;_eAED=0.39
tig00396695	maker	exon	274834	275229	.	+	.	Parent=Cnem057846-RA;ID=Cnem057846-RA:exon:228071
tig00396695	maker	CDS	274834	275229	.	+	0	Parent=Cnem057846-RA;ID=Cnem057846-RA:cds
tig00396695	maker	gene	451166	453847	.	-	.	Name=Cnem057856;ID=Cnem057856;Alias=snap-tig00396695-processed-gene-0.172
tig00396695	maker	mRNA	451166	453847	.	-	.	_eAED=1.00;Name=Cnem057856-RA;Parent=Cnem057856;ID=Cnem057856-RA;_AED=0.42;Alias=snap-tig00396695-processed-gene-0.172-mRNA-1;_QI=0|-1|0|1|-1|1|1|0|893
tig00396695	maker	CDS	451166	453847	.	-	0	Parent=Cnem057856-RA;ID=Cnem057856-RA:cds
tig00396695	maker	exon	451166	453847	.	-	.	ID=Cnem057856-RA:exon:228150;Parent=Cnem057856-RA
tig00396695	maker	gene	282768	322533	.	+	.	ID=Cnem057848;Alias=maker-tig00396695-snap-gene-0.191;Name=Cnem057848
tig00396695	maker	mRNA	282768	322533	.	+	.	_QI=62|0.83|0.89|1|0.61|0.68|19|165|698;ID=Cnem057848-RA;_AED=0.06;Alias=maker-tig00396695-snap-gene-0.191-mRNA-1;Parent=Cnem057848;_eAED=0.06;Name=Cnem057848-RA
tig00396695	maker	exon	301974	302096	.	+	.	Parent=Cnem057848-RA;ID=Cnem057848-RA:exon:228043
tig00396695	maker	exon	314190	314271	.	+	.	ID=Cnem057848-RA:exon:228046;Parent=Cnem057848-RA
tig00396695	maker	exon	287934	288032	.	+	.	Parent=Cnem057848-RA;ID=Cnem057848-RA:exon:228035
tig00396695	maker	exon	318117	318176	.	+	.	ID=Cnem057848-RA:exon:228048;Parent=Cnem057848-RA
tig00396695	maker	exon	286770	286866	.	+	.	ID=Cnem057848-RA:exon:228034;Parent=Cnem057848-RA
tig00396695	maker	exon	293167	293255	.	+	.	ID=Cnem057848-RA:exon:228038;Parent=Cnem057848-RA
tig00396695	maker	exon	284343	284431	.	+	.	Parent=Cnem057848-RA;ID=Cnem057848-RA:exon:228033
tig00396695	maker	exon	297114	297217	.	+	.	Parent=Cnem057848-RA;ID=Cnem057848-RA:exon:228040
tig00396695	maker	exon	299172	299405	.	+	.	ID=Cnem057848-RA:exon:228042;Parent=Cnem057848-RA
tig00396695	maker	exon	322147	322426	.	+	.	ID=Cnem057848-RA:exon:228049;Parent=Cnem057848-RA
tig00396695	maker	exon	289670	289780	.	+	.	Parent=Cnem057848-RA;ID=Cnem057848-RA:exon:228036
tig00396695	maker	exon	322484	322533	.	+	.	Parent=Cnem057848-RA;ID=Cnem057848-RA:exon:228050
tig00396695	maker	exon	316637	316785	.	+	.	ID=Cnem057848-RA:exon:228047;Parent=Cnem057848-RA
tig00396695	maker	exon	297716	297844	.	+	.	Parent=Cnem057848-RA;ID=Cnem057848-RA:exon:228041
tig00396695	maker	exon	291348	291488	.	+	.	ID=Cnem057848-RA:exon:228037;Parent=Cnem057848-RA
tig00396695	maker	exon	282768	282916	.	+	.	ID=Cnem057848-RA:exon:228032;Parent=Cnem057848-RA
tig00396695	maker	exon	305194	305343	.	+	.	ID=Cnem057848-RA:exon:228044;Parent=Cnem057848-RA
tig00396695	maker	exon	295911	296032	.	+	.	ID=Cnem057848-RA:exon:228039;Parent=Cnem057848-RA
tig00396695	maker	exon	311837	311902	.	+	.	ID=Cnem057848-RA:exon:228045;Parent=Cnem057848-RA
tig00396695	maker	CDS	305194	305343	.	+	0	Parent=Cnem057848-RA;ID=Cnem057848-RA:cds_dup248289
tig00396695	maker	CDS	293167	293255	.	+	0	Parent=Cnem057848-RA;ID=Cnem057848-RA:cds_dup248283
tig00396695	maker	CDS	314190	314271	.	+	0	Parent=Cnem057848-RA;ID=Cnem057848-RA:cds_dup248291
tig00396695	maker	CDS	299172	299405	.	+	0	ID=Cnem057848-RA:cds_dup248287;Parent=Cnem057848-RA
tig00396695	maker	CDS	289670	289780	.	+	0	ID=Cnem057848-RA:cds_dup248281;Parent=Cnem057848-RA
tig00396695	maker	CDS	301974	302096	.	+	0	ID=Cnem057848-RA:cds_dup248288;Parent=Cnem057848-RA
tig00396695	maker	CDS	297716	297844	.	+	0	Parent=Cnem057848-RA;ID=Cnem057848-RA:cds_dup248286
tig00396695	maker	CDS	291348	291488	.	+	0	Parent=Cnem057848-RA;ID=Cnem057848-RA:cds_dup248282
tig00396695	maker	CDS	322147	322311	.	+	0	ID=Cnem057848-RA:cds_dup248294;Parent=Cnem057848-RA
tig00396695	maker	CDS	284343	284431	.	+	0	ID=Cnem057848-RA:cds_dup248278;Parent=Cnem057848-RA
tig00396695	maker	CDS	282830	282916	.	+	0	Parent=Cnem057848-RA;ID=Cnem057848-RA:cds
tig00396695	maker	CDS	318117	318176	.	+	0	Parent=Cnem057848-RA;ID=Cnem057848-RA:cds_dup248293
tig00396695	maker	CDS	295911	296032	.	+	1	Parent=Cnem057848-RA;ID=Cnem057848-RA:cds_dup248284
tig00396695	maker	CDS	316637	316785	.	+	2	ID=Cnem057848-RA:cds_dup248292;Parent=Cnem057848-RA
tig00396695	maker	CDS	311837	311902	.	+	0	Parent=Cnem057848-RA;ID=Cnem057848-RA:cds_dup248290
tig00396695	maker	CDS	287934	288032	.	+	0	Parent=Cnem057848-RA;ID=Cnem057848-RA:cds_dup248280
tig00396695	maker	CDS	286770	286866	.	+	1	ID=Cnem057848-RA:cds_dup248279;Parent=Cnem057848-RA
tig00396695	maker	CDS	297114	297217	.	+	2	Parent=Cnem057848-RA;ID=Cnem057848-RA:cds_dup248285
ctg2746	maker	gene	480636	481982	.	-	.	Name=Cnem057830;Alias=maker-ctg2746-augustus-gene-0.15;ID=Cnem057830
ctg2746	maker	mRNA	480636	481982	.	-	.	Parent=Cnem057830;_eAED=0.02;Name=Cnem057830-RA;_QI=0|0|0|1|1|1|2|0|351;ID=Cnem057830-RA;_AED=0.06;Alias=maker-ctg2746-augustus-gene-0.15-mRNA-1
ctg2746	maker	exon	481416	481982	.	-	.	ID=Cnem057830-RA:exon:626591;Parent=Cnem057830-RA
ctg2746	maker	exon	480636	481124	.	-	.	ID=Cnem057830-RA:exon:626590;Parent=Cnem057830-RA
ctg2746	maker	CDS	481416	481982	.	-	0	ID=Cnem057830-RA:cds;Parent=Cnem057830-RA
ctg2746	maker	CDS	480636	481124	.	-	0	Parent=Cnem057830-RA;ID=Cnem057830-RA:cds_dup143
tig00396695	maker	gene	237200	246370	.	-	.	ID=Cnem057842;Alias=maker-tig00396695-augustus-gene-0.12;Name=Cnem057842
tig00396695	maker	mRNA	237200	246370	.	-	.	_eAED=0.09;Name=Cnem057842-RA;Parent=Cnem057842;_AED=0.28;ID=Cnem057842-RA;Alias=maker-tig00396695-augustus-gene-0.12-mRNA-1;_QI=0|0|0|1|1|1|2|0|418
tig00396695	maker	CDS	245981	246370	.	-	0	ID=Cnem057842-RA:cds;Parent=Cnem057842-RA
tig00396695	maker	CDS	237200	238066	.	-	0	Parent=Cnem057842-RA;ID=Cnem057842-RA:cds_dup248328
tig00396695	maker	exon	245981	246370	.	-	.	ID=Cnem057842-RA:exon:228118;Parent=Cnem057842-RA
tig00396695	maker	exon	237200	238066	.	-	.	Parent=Cnem057842-RA;ID=Cnem057842-RA:exon:228117
ctg7522	maker	gene	83206	97444	.	+	.	Name=Cnem114171;Alias=maker-ctg7522-snap-gene-0.7;ID=Cnem114171
ctg7522	maker	mRNA	83206	97444	.	+	.	_AED=0.06;Alias=maker-ctg7522-snap-gene-0.7-mRNA-1;ID=Cnem114171-RA;_QI=75|0.75|0.6|0.8|0.25|0.4|5|0|194;_eAED=0.06;Name=Cnem114171-RA;Parent=Cnem114171
ctg7522	maker	CDS	94784	94934	.	+	1	Parent=Cnem114171-RA;ID=Cnem114171-RA:cds_dup168
ctg7522	maker	CDS	83281	83283	.	+	0	ID=Cnem114171-RA:cds;Parent=Cnem114171-RA
ctg7522	maker	CDS	89464	89717	.	+	0	Parent=Cnem114171-RA;ID=Cnem114171-RA:cds_dup167
ctg7522	maker	CDS	95812	95934	.	+	0	Parent=Cnem114171-RA;ID=Cnem114171-RA:cds_dup169
ctg7522	maker	CDS	97394	97444	.	+	0	Parent=Cnem114171-RA;ID=Cnem114171-RA:cds_dup170
ctg7522	maker	exon	89464	89717	.	+	.	ID=Cnem114171-RA:exon:345199;Parent=Cnem114171-RA
ctg7522	maker	exon	97394	97444	.	+	.	ID=Cnem114171-RA:exon:345202;Parent=Cnem114171-RA
ctg7522	maker	exon	94784	94934	.	+	.	ID=Cnem114171-RA:exon:345200;Parent=Cnem114171-RA
ctg7522	maker	exon	83206	83283	.	+	.	Parent=Cnem114171-RA;ID=Cnem114171-RA:exon:345198
ctg7522	maker	exon	95812	95934	.	+	.	ID=Cnem114171-RA:exon:345201;Parent=Cnem114171-RA
ctg7522	maker	gene	135292	153478	.	+	.	Name=Cnem114172;ID=Cnem114172;Alias=maker-ctg7522-snap-gene-0.10
ctg7522	maker	mRNA	135292	153478	.	+	.	Alias=maker-ctg7522-snap-gene-0.10-mRNA-1;_AED=0.10;ID=Cnem114172-RA;_QI=0|1|0.8|1|0.25|0.4|5|529|231;_eAED=0.10;Name=Cnem114172-RA;Parent=Cnem114172
ctg7522	maker	CDS	142455	142613	.	+	0	Parent=Cnem114172-RA;ID=Cnem114172-RA:cds_dup171
ctg7522	maker	CDS	135292	135414	.	+	0	Parent=Cnem114172-RA;ID=Cnem114172-RA:cds
ctg7522	maker	CDS	152749	152949	.	+	0	Parent=Cnem114172-RA;ID=Cnem114172-RA:cds_dup174
ctg7522	maker	CDS	145145	145222	.	+	0	ID=Cnem114172-RA:cds_dup172;Parent=Cnem114172-RA
ctg7522	maker	CDS	150392	150526	.	+	0	Parent=Cnem114172-RA;ID=Cnem114172-RA:cds_dup173
ctg7522	maker	exon	135292	135414	.	+	.	Parent=Cnem114172-RA;ID=Cnem114172-RA:exon:345203
ctg7522	maker	exon	150392	150526	.	+	.	ID=Cnem114172-RA:exon:345206;Parent=Cnem114172-RA
ctg7522	maker	exon	142455	142613	.	+	.	Parent=Cnem114172-RA;ID=Cnem114172-RA:exon:345204
ctg7522	maker	exon	152749	153478	.	+	.	Parent=Cnem114172-RA;ID=Cnem114172-RA:exon:345207
ctg7522	maker	exon	145145	145222	.	+	.	Parent=Cnem114172-RA;ID=Cnem114172-RA:exon:345205
ctg7522	maker	gene	137399	139545	.	-	.	Name=Cnem114173;ID=Cnem114173;Alias=augustus-ctg7522-processed-gene-0.49
ctg7522	maker	mRNA	137399	139545	.	-	.	Name=Cnem114173-RA;_eAED=0.22;Parent=Cnem114173;_AED=0.22;Alias=augustus-ctg7522-processed-gene-0.49-mRNA-1;ID=Cnem114173-RA;_QI=0|0|0|1|1|1|3|0|468
ctg7522	maker	exon	139213	139545	.	-	.	ID=Cnem114173-RA:exon:345242;Parent=Cnem114173-RA
ctg7522	maker	exon	137399	138305	.	-	.	Parent=Cnem114173-RA;ID=Cnem114173-RA:exon:345240
ctg7522	maker	exon	138942	139108	.	-	.	Parent=Cnem114173-RA;ID=Cnem114173-RA:exon:345241
ctg7522	maker	CDS	138942	139108	.	-	0	ID=Cnem114173-RA:cds_dup177;Parent=Cnem114173-RA
ctg7522	maker	CDS	139213	139545	.	-	0	ID=Cnem114173-RA:cds;Parent=Cnem114173-RA
ctg7522	maker	CDS	137399	138305	.	-	1	ID=Cnem114173-RA:cds_dup178;Parent=Cnem114173-RA
ctg7522	maker	gene	19043	20200	.	+	.	Name=Cnem114168;Alias=maker-ctg7522-snap-gene-0.2;ID=Cnem114168
ctg7522	maker	mRNA	19043	20200	.	+	.	_eAED=0.28;Name=Cnem114168-RA;Parent=Cnem114168;Alias=maker-ctg7522-snap-gene-0.2-mRNA-1;_AED=0.28;ID=Cnem114168-RA;_QI=0|0|0|1|0|0|4|0|253
ctg7522	maker	exon	19043	19141	.	+	.	Parent=Cnem114168-RA;ID=Cnem114168-RA:exon:345252
ctg7522	maker	exon	19151	19264	.	+	.	Parent=Cnem114168-RA;ID=Cnem114168-RA:exon:345253
ctg7522	maker	exon	19640	19923	.	+	.	Parent=Cnem114168-RA;ID=Cnem114168-RA:exon:345254
ctg7522	maker	exon	19936	20200	.	+	.	Parent=Cnem114168-RA;ID=Cnem114168-RA:exon:345255
ctg7522	maker	CDS	19640	19923	.	+	0	Parent=Cnem114168-RA;ID=Cnem114168-RA:cds_dup180
ctg7522	maker	CDS	19151	19264	.	+	0	ID=Cnem114168-RA:cds_dup179;Parent=Cnem114168-RA
ctg7522	maker	CDS	19936	20200	.	+	1	Parent=Cnem114168-RA;ID=Cnem114168-RA:cds_dup181
ctg7522	maker	CDS	19043	19141	.	+	0	ID=Cnem114168-RA:cds;Parent=Cnem114168-RA
ctg23234	maker	gene	9042	16471	.	-	.	ID=Cnem163393;Alias=augustus-ctg23234-processed-gene-0.2;Name=Cnem163393
ctg23234	maker	mRNA	9042	16471	.	-	.	Parent=Cnem163393;_eAED=0.03;Name=Cnem163393-RA;_QI=0|0|0|0.66|1|1|3|0|641;Alias=augustus-ctg23234-processed-gene-0.2-mRNA-1;_AED=0.08;ID=Cnem163393-RA
ctg23234	maker	CDS	15125	16471	.	-	0	Parent=Cnem163393-RA;ID=Cnem163393-RA:cds
ctg23234	maker	CDS	13650	13720	.	-	0	ID=Cnem163393-RA:cds_dup186;Parent=Cnem163393-RA
ctg23234	maker	CDS	9042	9549	.	-	1	ID=Cnem163393-RA:cds_dup187;Parent=Cnem163393-RA
ctg23234	maker	exon	13650	13720	.	-	.	ID=Cnem163393-RA:exon:377776;Parent=Cnem163393-RA
ctg23234	maker	exon	15125	16471	.	-	.	ID=Cnem163393-RA:exon:377777;Parent=Cnem163393-RA
ctg23234	maker	exon	9042	9549	.	-	.	Parent=Cnem163393-RA;ID=Cnem163393-RA:exon:377775
ctg3143	maker	gene	256251	257350	.	+	.	Alias=snap-ctg3143-processed-gene-0.80;ID=Cnem076960;Name=Cnem076960
ctg3143	maker	mRNA	256251	257350	.	+	.	_QI=0|0|0|0.33|1|1|3|0|335;ID=Cnem076960-RA;_AED=0.33;Alias=snap-ctg3143-processed-gene-0.80-mRNA-1;Parent=Cnem076960;Name=Cnem076960-RA;_eAED=0.20
ctg3143	maker	exon	256575	256859	.	+	.	ID=Cnem076960-RA:exon:486759;Parent=Cnem076960-RA
ctg3143	maker	exon	256919	257350	.	+	.	ID=Cnem076960-RA:exon:486760;Parent=Cnem076960-RA
ctg3143	maker	exon	256251	256541	.	+	.	ID=Cnem076960-RA:exon:486758;Parent=Cnem076960-RA
ctg3143	maker	CDS	256575	256859	.	+	0	ID=Cnem076960-RA:cds_dup192;Parent=Cnem076960-RA
ctg3143	maker	CDS	256919	257350	.	+	0	Parent=Cnem076960-RA;ID=Cnem076960-RA:cds_dup193
ctg3143	maker	CDS	256251	256541	.	+	0	ID=Cnem076960-RA:cds;Parent=Cnem076960-RA
ctg3143	maker	gene	49561	53105	.	-	.	Name=Cnem076951;ID=Cnem076951;Alias=maker-ctg3143-snap-gene-0.6
ctg3143	maker	mRNA	49561	53105	.	-	.	_AED=0.22;ID=Cnem076951-RA;Alias=maker-ctg3143-snap-gene-0.6-mRNA-1;_QI=0|0|0|1|0.5|0.33|3|0|1164;Name=Cnem076951-RA;_eAED=-0.02;Parent=Cnem076951
ctg3143	maker	CDS	49561	50383	.	-	1	Parent=Cnem076951-RA;ID=Cnem076951-RA:cds_dup198
ctg3143	maker	CDS	50394	51181	.	-	0	ID=Cnem076951-RA:cds_dup197;Parent=Cnem076951-RA
ctg3143	maker	CDS	51222	53105	.	-	0	Parent=Cnem076951-RA;ID=Cnem076951-RA:cds
ctg3143	maker	exon	50394	51181	.	-	.	Parent=Cnem076951-RA;ID=Cnem076951-RA:exon:486766
ctg3143	maker	exon	49561	50383	.	-	.	Parent=Cnem076951-RA;ID=Cnem076951-RA:exon:486765
ctg3143	maker	exon	51222	53105	.	-	.	Parent=Cnem076951-RA;ID=Cnem076951-RA:exon:486767
ctg3143	maker	gene	340742	342544	.	+	.	Name=Cnem076967;ID=Cnem076967;Alias=maker-ctg3143-snap-gene-0.3
ctg3143	maker	mRNA	340742	342544	.	+	.	_eAED=0.43;Name=Cnem076967-RA;Parent=Cnem076967;_AED=0.26;Alias=maker-ctg3143-snap-gene-0.3-mRNA-1;ID=Cnem076967-RA;_QI=0|0|0|1|0|0|3|0|422
ctg3143	maker	CDS	342207	342544	.	+	2	Parent=Cnem076967-RA;ID=Cnem076967-RA:cds_dup206
ctg3143	maker	CDS	340742	341314	.	+	0	ID=Cnem076967-RA:cds;Parent=Cnem076967-RA
ctg3143	maker	CDS	341396	341753	.	+	0	Parent=Cnem076967-RA;ID=Cnem076967-RA:cds_dup205
ctg3143	maker	exon	341396	341753	.	+	.	ID=Cnem076967-RA:exon:486788;Parent=Cnem076967-RA
ctg3143	maker	exon	342207	342544	.	+	.	Parent=Cnem076967-RA;ID=Cnem076967-RA:exon:486789
ctg3143	maker	exon	340742	341314	.	+	.	ID=Cnem076967-RA:exon:486787;Parent=Cnem076967-RA
ctg2257	maker	gene	200333	206157	.	+	.	Name=Cnem051765;ID=Cnem051765;Alias=maker-ctg2257-augustus-gene-0.255
ctg2257	maker	mRNA	200333	206157	.	+	.	_QI=0|0|0|0.5|1|1|4|0|1766;_AED=0.33;Alias=maker-ctg2257-augustus-gene-0.255-mRNA-1;ID=Cnem051765-RA;Parent=Cnem051765;Name=Cnem051765-RA;_eAED=0.12
ctg2257	maker	exon	200730	201668	.	+	.	ID=Cnem051765-RA:exon:667208;Parent=Cnem051765-RA
ctg2257	maker	exon	204113	206157	.	+	.	ID=Cnem051765-RA:exon:667210;Parent=Cnem051765-RA
ctg2257	maker	exon	200333	200372	.	+	.	Parent=Cnem051765-RA;ID=Cnem051765-RA:exon:667207
ctg2257	maker	exon	201737	204013	.	+	.	Parent=Cnem051765-RA;ID=Cnem051765-RA:exon:667209
ctg2257	maker	CDS	201737	204013	.	+	2	Parent=Cnem051765-RA;ID=Cnem051765-RA:cds_dup215
ctg2257	maker	CDS	200730	201668	.	+	2	Parent=Cnem051765-RA;ID=Cnem051765-RA:cds_dup214
ctg2257	maker	CDS	200333	200372	.	+	0	ID=Cnem051765-RA:cds;Parent=Cnem051765-RA
ctg2257	maker	CDS	204113	206157	.	+	2	ID=Cnem051765-RA:cds_dup216;Parent=Cnem051765-RA
ctg2257	maker	gene	256401	274501	.	+	.	Name=Cnem051769;ID=Cnem051769;Alias=maker-ctg2257-augustus-gene-0.256
ctg2257	maker	mRNA	256401	274501	.	+	.	Name=Cnem051769-RA;_eAED=0.13;Parent=Cnem051769;_AED=0.13;ID=Cnem051769-RA;Alias=maker-ctg2257-augustus-gene-0.256-mRNA-1;_QI=0|0.9|0.90|0.90|0.8|0.72|11|2586|510
ctg2257	maker	CDS	257979	258181	.	+	2	ID=Cnem051769-RA:cds_dup217;Parent=Cnem051769-RA
ctg2257	maker	CDS	259915	260078	.	+	0	Parent=Cnem051769-RA;ID=Cnem051769-RA:cds_dup219
ctg2257	maker	CDS	266734	266851	.	+	0	Parent=Cnem051769-RA;ID=Cnem051769-RA:cds_dup222
ctg2257	maker	CDS	271467	271691	.	+	0	Parent=Cnem051769-RA;ID=Cnem051769-RA:cds_dup224
ctg2257	maker	CDS	269098	269345	.	+	2	Parent=Cnem051769-RA;ID=Cnem051769-RA:cds_dup223
ctg2257	maker	CDS	259221	259388	.	+	0	ID=Cnem051769-RA:cds_dup218;Parent=Cnem051769-RA
ctg2257	maker	CDS	264949	265088	.	+	2	Parent=Cnem051769-RA;ID=Cnem051769-RA:cds_dup221
ctg2257	maker	CDS	256401	256542	.	+	0	ID=Cnem051769-RA:cds;Parent=Cnem051769-RA
ctg2257	maker	CDS	263488	263612	.	+	1	ID=Cnem051769-RA:cds_dup220;Parent=Cnem051769-RA
ctg2257	maker	exon	256401	256542	.	+	.	Parent=Cnem051769-RA;ID=Cnem051769-RA:exon:667211
ctg2257	maker	exon	257979	258181	.	+	.	Parent=Cnem051769-RA;ID=Cnem051769-RA:exon:667212
ctg2257	maker	exon	263488	263612	.	+	.	Parent=Cnem051769-RA;ID=Cnem051769-RA:exon:667215
ctg2257	maker	exon	259221	259388	.	+	.	Parent=Cnem051769-RA;ID=Cnem051769-RA:exon:667213
ctg2257	maker	exon	271467	272505	.	+	.	ID=Cnem051769-RA:exon:667219;Parent=Cnem051769-RA
ctg2257	maker	exon	272634	273323	.	+	.	Parent=Cnem051769-RA;ID=Cnem051769-RA:exon:667220
ctg2257	maker	exon	273420	274501	.	+	.	ID=Cnem051769-RA:exon:667221;Parent=Cnem051769-RA
ctg2257	maker	exon	269098	269345	.	+	.	ID=Cnem051769-RA:exon:667218;Parent=Cnem051769-RA
ctg2257	maker	exon	259915	260078	.	+	.	ID=Cnem051769-RA:exon:667214;Parent=Cnem051769-RA
ctg2257	maker	exon	266734	266851	.	+	.	Parent=Cnem051769-RA;ID=Cnem051769-RA:exon:667217
ctg2257	maker	exon	264949	265088	.	+	.	Parent=Cnem051769-RA;ID=Cnem051769-RA:exon:667216
ctg2257	maker	gene	115058	116349	.	+	.	Name=Cnem051756;Alias=snap-ctg2257-processed-gene-0.128;ID=Cnem051756
ctg2257	maker	mRNA	115058	116349	.	+	.	_eAED=0.44;Name=Cnem051756-RA;Parent=Cnem051756;_AED=0.44;ID=Cnem051756-RA;Alias=snap-ctg2257-processed-gene-0.128-mRNA-1;_QI=0|0|0|0.33|1|1|3|0|219
ctg2257	maker	exon	115058	115329	.	+	.	ID=Cnem051756-RA:exon:667244;Parent=Cnem051756-RA
ctg2257	maker	exon	116083	116349	.	+	.	Parent=Cnem051756-RA;ID=Cnem051756-RA:exon:667246
ctg2257	maker	exon	115812	115932	.	+	.	Parent=Cnem051756-RA;ID=Cnem051756-RA:exon:667245
ctg2257	maker	CDS	115058	115329	.	+	0	ID=Cnem051756-RA:cds;Parent=Cnem051756-RA
ctg2257	maker	CDS	115812	115932	.	+	1	Parent=Cnem051756-RA;ID=Cnem051756-RA:cds_dup233
ctg2257	maker	CDS	116083	116349	.	+	0	ID=Cnem051756-RA:cds_dup234;Parent=Cnem051756-RA
ctg2257	maker	gene	96644	119396	.	-	.	Name=Cnem051755;Alias=augustus-ctg2257-processed-gene-0.81;ID=Cnem051755
ctg2257	maker	mRNA	96644	119396	.	-	.	Parent=Cnem051755;Name=Cnem051755-RA;_eAED=0.01;_QI=136|0.6|0.83|1|0.4|0.33|6|478|587;ID=Cnem051755-RA;_AED=0.13;Alias=augustus-ctg2257-processed-gene-0.81-mRNA-1
ctg2257	maker	CDS	103628	104354	.	-	0	ID=Cnem051755-RA:cds_dup235;Parent=Cnem051755-RA
ctg2257	maker	CDS	97122	97522	.	-	2	Parent=Cnem051755-RA;ID=Cnem051755-RA:cds_dup237
ctg2257	maker	CDS	100104	100604	.	-	2	Parent=Cnem051755-RA;ID=Cnem051755-RA:cds_dup236
ctg2257	maker	CDS	108084	108218	.	-	0	ID=Cnem051755-RA:cds;Parent=Cnem051755-RA
ctg2257	maker	exon	114045	114112	.	-	.	Parent=Cnem051755-RA;ID=Cnem051755-RA:exon:667256
ctg2257	maker	exon	96644	97522	.	-	.	Parent=Cnem051755-RA;ID=Cnem051755-RA:exon:667260
ctg2257	maker	exon	100104	100604	.	-	.	Parent=Cnem051755-RA;ID=Cnem051755-RA:exon:667259
ctg2257	maker	exon	119338	119396	.	-	.	ID=Cnem051755-RA:exon:667255;Parent=Cnem051755-RA
ctg2257	maker	exon	103628	104354	.	-	.	ID=Cnem051755-RA:exon:667258;Parent=Cnem051755-RA
ctg2257	maker	exon	108084	108227	.	-	.	Parent=Cnem051755-RA;ID=Cnem051755-RA:exon:667257
ctg2257	maker	gene	170071	193596	.	-	.	Alias=maker-ctg2257-snap-gene-0.16;ID=Cnem051764;Name=Cnem051764
ctg2257	maker	mRNA	170071	193596	.	-	.	_AED=0.24;Alias=maker-ctg2257-snap-gene-0.16-mRNA-1;ID=Cnem051764-RA;_QI=102|0.88|0.8|0.9|0.55|0.7|10|0|427;Name=Cnem051764-RA;_eAED=0.24;Parent=Cnem051764
ctg2257	maker	exon	177213	177439	.	-	.	Parent=Cnem051764-RA;ID=Cnem051764-RA:exon:667273
ctg2257	maker	exon	184887	184985	.	-	.	Parent=Cnem051764-RA;ID=Cnem051764-RA:exon:667269
ctg2257	maker	exon	170071	170233	.	-	.	ID=Cnem051764-RA:exon:667276;Parent=Cnem051764-RA
ctg2257	maker	exon	177830	178006	.	-	.	ID=Cnem051764-RA:exon:667272;Parent=Cnem051764-RA
ctg2257	maker	exon	189639	189733	.	-	.	ID=Cnem051764-RA:exon:667268;Parent=Cnem051764-RA
ctg2257	maker	exon	182644	182787	.	-	.	Parent=Cnem051764-RA;ID=Cnem051764-RA:exon:667271
ctg2257	maker	exon	174890	175009	.	-	.	ID=Cnem051764-RA:exon:667275;Parent=Cnem051764-RA
ctg2257	maker	exon	193434	193596	.	-	.	ID=Cnem051764-RA:exon:667267;Parent=Cnem051764-RA
ctg2257	maker	exon	176235	176321	.	-	.	Parent=Cnem051764-RA;ID=Cnem051764-RA:exon:667274
ctg2257	maker	exon	183704	183814	.	-	.	Parent=Cnem051764-RA;ID=Cnem051764-RA:exon:667270
ctg2257	maker	CDS	174890	175009	.	-	1	ID=Cnem051764-RA:cds_dup247;Parent=Cnem051764-RA
ctg2257	maker	CDS	170071	170233	.	-	1	ID=Cnem051764-RA:cds_dup248;Parent=Cnem051764-RA
ctg2257	maker	CDS	177830	178006	.	-	0	Parent=Cnem051764-RA;ID=Cnem051764-RA:cds_dup244
ctg2257	maker	CDS	184887	184985	.	-	0	Parent=Cnem051764-RA;ID=Cnem051764-RA:cds_dup241
ctg2257	maker	CDS	193434	193494	.	-	0	ID=Cnem051764-RA:cds;Parent=Cnem051764-RA
ctg2257	maker	CDS	177213	177439	.	-	0	ID=Cnem051764-RA:cds_dup245;Parent=Cnem051764-RA
ctg2257	maker	CDS	176235	176321	.	-	1	ID=Cnem051764-RA:cds_dup246;Parent=Cnem051764-RA
ctg2257	maker	CDS	182644	182787	.	-	0	Parent=Cnem051764-RA;ID=Cnem051764-RA:cds_dup243
ctg2257	maker	CDS	189639	189733	.	-	2	ID=Cnem051764-RA:cds_dup240;Parent=Cnem051764-RA
ctg2257	maker	CDS	183704	183814	.	-	0	Parent=Cnem051764-RA;ID=Cnem051764-RA:cds_dup242
ctg2257	maker	gene	382133	383068	.	-	.	Name=Cnem051774;ID=Cnem051774;Alias=maker-ctg2257-snap-gene-0.21
ctg2257	maker	mRNA	382133	383068	.	-	.	Parent=Cnem051774;_eAED=-0.04;Name=Cnem051774-RA;_QI=0|0|0|1|0|0|2|0|249;ID=Cnem051774-RA;_AED=0.31;Alias=maker-ctg2257-snap-gene-0.21-mRNA-1
ctg2257	maker	exon	382676	383068	.	-	.	Parent=Cnem051774-RA;ID=Cnem051774-RA:exon:667315
ctg2257	maker	exon	382133	382489	.	-	.	Parent=Cnem051774-RA;ID=Cnem051774-RA:exon:667314
ctg2257	maker	CDS	382133	382489	.	-	0	ID=Cnem051774-RA:cds_dup257;Parent=Cnem051774-RA
ctg2257	maker	CDS	382676	383068	.	-	0	Parent=Cnem051774-RA;ID=Cnem051774-RA:cds
ctg14900	maker	gene	60771	61208	.	+	.	Name=Cnem139214;Alias=augustus-ctg14900-processed-gene-0.12;ID=Cnem139214
ctg14900	maker	mRNA	60771	61208	.	+	.	Parent=Cnem139214;Name=Cnem139214-RA;_eAED=0.06;_QI=0|-1|0|1|-1|1|1|0|145;_AED=0.06;ID=Cnem139214-RA;Alias=augustus-ctg14900-processed-gene-0.12-mRNA-1
ctg14900	maker	CDS	60771	61208	.	+	0	Parent=Cnem139214-RA;ID=Cnem139214-RA:cds
ctg14900	maker	exon	60771	61208	.	+	.	Parent=Cnem139214-RA;ID=Cnem139214-RA:exon:538628
ctg14900	maker	gene	6943	9674	.	-	.	Name=Cnem139209;ID=Cnem139209;Alias=augustus-ctg14900-processed-gene-0.19
ctg14900	maker	mRNA	6943	9674	.	-	.	Parent=Cnem139209;Name=Cnem139209-RA;_eAED=-0.64;_QI=0|0|0|0.33|1|1|3|0|797;_AED=0.45;Alias=augustus-ctg14900-processed-gene-0.19-mRNA-1;ID=Cnem139209-RA
ctg14900	maker	CDS	9005	9674	.	-	0	Parent=Cnem139209-RA;ID=Cnem139209-RA:cds
ctg14900	maker	CDS	6943	8018	.	-	2	ID=Cnem139209-RA:cds_dup264;Parent=Cnem139209-RA
ctg14900	maker	CDS	8089	8736	.	-	2	ID=Cnem139209-RA:cds_dup263;Parent=Cnem139209-RA
ctg14900	maker	exon	6943	8018	.	-	.	ID=Cnem139209-RA:exon:538637;Parent=Cnem139209-RA
ctg14900	maker	exon	9005	9674	.	-	.	Parent=Cnem139209-RA;ID=Cnem139209-RA:exon:538639
ctg14900	maker	exon	8089	8736	.	-	.	Parent=Cnem139209-RA;ID=Cnem139209-RA:exon:538638
ctg14900	maker	gene	18000	19575	.	-	.	Alias=maker-ctg14900-snap-gene-0.81;ID=Cnem139212;Name=Cnem139212
ctg14900	maker	mRNA	18000	19575	.	-	.	_AED=0.19;ID=Cnem139212-RA;Alias=maker-ctg14900-snap-gene-0.81-mRNA-1;_QI=0|0|0|0.66|0|0|3|0|257;Name=Cnem139212-RA;_eAED=0.11;Parent=Cnem139212
ctg14900	maker	exon	18358	18709	.	-	.	Parent=Cnem139212-RA;ID=Cnem139212-RA:exon:538642
ctg14900	maker	exon	19430	19575	.	-	.	Parent=Cnem139212-RA;ID=Cnem139212-RA:exon:538643
ctg14900	maker	exon	18000	18275	.	-	.	Parent=Cnem139212-RA;ID=Cnem139212-RA:exon:538641
ctg14900	maker	CDS	18358	18709	.	-	1	Parent=Cnem139212-RA;ID=Cnem139212-RA:cds_dup265
ctg14900	maker	CDS	18000	18275	.	-	0	ID=Cnem139212-RA:cds_dup266;Parent=Cnem139212-RA
ctg14900	maker	CDS	19430	19575	.	-	0	Parent=Cnem139212-RA;ID=Cnem139212-RA:cds
ctg3408	maker	gene	12743	49258	.	+	.	Name=Cnem096224;Alias=maker-ctg3408-snap-gene-0.1;ID=Cnem096224
ctg3408	maker	mRNA	12743	49258	.	+	.	_QI=0|0.69|0.5|0.85|0.53|0.57|14|0|804;Alias=maker-ctg3408-snap-gene-0.1-mRNA-1;_AED=0.33;ID=Cnem096224-RA;Parent=Cnem096224;_eAED=0.33;Name=Cnem096224-RA
ctg3408	maker	exon	17902	18059	.	+	.	ID=Cnem096224-RA:exon:612381;Parent=Cnem096224-RA
ctg3408	maker	exon	38663	38919	.	+	.	Parent=Cnem096224-RA;ID=Cnem096224-RA:exon:612387
ctg3408	maker	exon	48619	48814	.	+	.	Parent=Cnem096224-RA;ID=Cnem096224-RA:exon:612390
ctg3408	maker	exon	12743	12766	.	+	.	ID=Cnem096224-RA:exon:612378;Parent=Cnem096224-RA
ctg3408	maker	exon	47149	47456	.	+	.	ID=Cnem096224-RA:exon:612389;Parent=Cnem096224-RA
ctg3408	maker	exon	34244	34315	.	+	.	Parent=Cnem096224-RA;ID=Cnem096224-RA:exon:612385
ctg3408	maker	exon	36815	36842	.	+	.	ID=Cnem096224-RA:exon:612386;Parent=Cnem096224-RA
ctg3408	maker	exon	12871	12930	.	+	.	ID=Cnem096224-RA:exon:612379;Parent=Cnem096224-RA
ctg3408	maker	exon	15721	15821	.	+	.	ID=Cnem096224-RA:exon:612380;Parent=Cnem096224-RA
ctg3408	maker	exon	31793	31976	.	+	.	Parent=Cnem096224-RA;ID=Cnem096224-RA:exon:612384
ctg3408	maker	exon	49237	49258	.	+	.	ID=Cnem096224-RA:exon:612391;Parent=Cnem096224-RA
ctg3408	maker	exon	42874	42970	.	+	.	ID=Cnem096224-RA:exon:612388;Parent=Cnem096224-RA
ctg3408	maker	exon	21573	22360	.	+	.	ID=Cnem096224-RA:exon:612383;Parent=Cnem096224-RA
ctg3408	maker	exon	19216	19335	.	+	.	ID=Cnem096224-RA:exon:612382;Parent=Cnem096224-RA
ctg3408	maker	CDS	34244	34315	.	+	2	Parent=Cnem096224-RA;ID=Cnem096224-RA:cds_dup273
ctg3408	maker	CDS	12743	12766	.	+	0	ID=Cnem096224-RA:cds;Parent=Cnem096224-RA
ctg3408	maker	CDS	36815	36842	.	+	2	ID=Cnem096224-RA:cds_dup274;Parent=Cnem096224-RA
ctg3408	maker	CDS	38663	38919	.	+	1	ID=Cnem096224-RA:cds_dup275;Parent=Cnem096224-RA
ctg3408	maker	CDS	19216	19335	.	+	2	Parent=Cnem096224-RA;ID=Cnem096224-RA:cds_dup270
ctg3408	maker	CDS	12871	12930	.	+	0	Parent=Cnem096224-RA;ID=Cnem096224-RA:cds_dup267
ctg3408	maker	CDS	17902	18059	.	+	1	ID=Cnem096224-RA:cds_dup269;Parent=Cnem096224-RA
ctg3408	maker	CDS	21573	22360	.	+	2	ID=Cnem096224-RA:cds_dup271;Parent=Cnem096224-RA
ctg3408	maker	CDS	47149	47456	.	+	1	ID=Cnem096224-RA:cds_dup277;Parent=Cnem096224-RA
ctg3408	maker	CDS	49237	49258	.	+	1	Parent=Cnem096224-RA;ID=Cnem096224-RA:cds_dup279
ctg3408	maker	CDS	31793	31976	.	+	0	ID=Cnem096224-RA:cds_dup272;Parent=Cnem096224-RA
ctg3408	maker	CDS	48619	48814	.	+	2	ID=Cnem096224-RA:cds_dup278;Parent=Cnem096224-RA
ctg3408	maker	CDS	42874	42970	.	+	2	ID=Cnem096224-RA:cds_dup276;Parent=Cnem096224-RA
ctg3408	maker	CDS	15721	15821	.	+	0	ID=Cnem096224-RA:cds_dup268;Parent=Cnem096224-RA
ctg3408	maker	gene	58790	68601	.	-	.	Name=Cnem096226;ID=Cnem096226;Alias=maker-ctg3408-snap-gene-0.6
ctg3408	maker	mRNA	58790	68601	.	-	.	Alias=maker-ctg3408-snap-gene-0.6-mRNA-1;_AED=0.17;ID=Cnem096226-RA;_QI=0|1|0.75|1|0.14|0|8|0|408;Name=Cnem096226-RA;_eAED=0.17;Parent=Cnem096226
ctg3408	maker	exon	60992	61057	.	-	.	ID=Cnem096226-RA:exon:612407;Parent=Cnem096226-RA
ctg3408	maker	exon	68361	68601	.	-	.	ID=Cnem096226-RA:exon:612402;Parent=Cnem096226-RA
ctg3408	maker	exon	58790	58926	.	-	.	Parent=Cnem096226-RA;ID=Cnem096226-RA:exon:612409
ctg3408	maker	exon	62532	62635	.	-	.	Parent=Cnem096226-RA;ID=Cnem096226-RA:exon:612405
ctg3408	maker	exon	61515	61706	.	-	.	ID=Cnem096226-RA:exon:612406;Parent=Cnem096226-RA
ctg3408	maker	exon	66846	67070	.	-	.	Parent=Cnem096226-RA;ID=Cnem096226-RA:exon:612403
ctg3408	maker	exon	60188	60299	.	-	.	Parent=Cnem096226-RA;ID=Cnem096226-RA:exon:612408
ctg3408	maker	exon	64051	64197	.	-	.	ID=Cnem096226-RA:exon:612404;Parent=Cnem096226-RA
ctg3408	maker	CDS	60188	60299	.	-	0	ID=Cnem096226-RA:cds_dup290;Parent=Cnem096226-RA
ctg3408	maker	CDS	64051	64197	.	-	2	ID=Cnem096226-RA:cds_dup286;Parent=Cnem096226-RA
ctg3408	maker	CDS	66846	67070	.	-	2	ID=Cnem096226-RA:cds_dup285;Parent=Cnem096226-RA
ctg3408	maker	CDS	58790	58926	.	-	2	Parent=Cnem096226-RA;ID=Cnem096226-RA:cds_dup291
ctg3408	maker	CDS	68361	68601	.	-	0	ID=Cnem096226-RA:cds;Parent=Cnem096226-RA
ctg3408	maker	CDS	62532	62635	.	-	2	ID=Cnem096226-RA:cds_dup287;Parent=Cnem096226-RA
ctg3408	maker	CDS	61515	61706	.	-	0	ID=Cnem096226-RA:cds_dup288;Parent=Cnem096226-RA
ctg3408	maker	CDS	60992	61057	.	-	0	ID=Cnem096226-RA:cds_dup289;Parent=Cnem096226-RA
ctg3408	maker	gene	41385	49078	.	-	.	Alias=snap-ctg3408-processed-gene-0.51;ID=Cnem096225;Name=Cnem096225
ctg3408	maker	mRNA	41385	49078	.	-	.	Parent=Cnem096225;Name=Cnem096225-RA;_eAED=0.82;_QI=0|0|0|0.5|1|1|4|0|278;_AED=0.41;Alias=snap-ctg3408-processed-gene-0.51-mRNA-1;ID=Cnem096225-RA
ctg3408	maker	exon	48651	49078	.	-	.	ID=Cnem096225-RA:exon:612414;Parent=Cnem096225-RA
ctg3408	maker	exon	42456	42502	.	-	.	ID=Cnem096225-RA:exon:612412;Parent=Cnem096225-RA
ctg3408	maker	exon	41385	41524	.	-	.	Parent=Cnem096225-RA;ID=Cnem096225-RA:exon:612411
ctg3408	maker	exon	44644	44865	.	-	.	Parent=Cnem096225-RA;ID=Cnem096225-RA:exon:612413
ctg3408	maker	CDS	42456	42502	.	-	1	Parent=Cnem096225-RA;ID=Cnem096225-RA:cds_dup293
ctg3408	maker	CDS	48651	49078	.	-	0	Parent=Cnem096225-RA;ID=Cnem096225-RA:cds
ctg3408	maker	CDS	44644	44865	.	-	1	ID=Cnem096225-RA:cds_dup292;Parent=Cnem096225-RA
ctg3408	maker	CDS	41385	41524	.	-	2	ID=Cnem096225-RA:cds_dup294;Parent=Cnem096225-RA
tig02186482	maker	gene	219155	234017	.	+	.	Alias=maker-tig02186482-augustus-gene-0.85;ID=Cnem033246;Name=Cnem033246
tig02186482	maker	mRNA	219155	234017	.	+	.	ID=Cnem033246-RA;_AED=0.20;Alias=maker-tig02186482-augustus-gene-0.85-mRNA-1;_QI=0|1|0.6|1|0.5|0.8|5|0|286;Name=Cnem033246-RA;_eAED=0.23;Parent=Cnem033246
tig02186482	maker	CDS	220259	220378	.	+	2	Parent=Cnem033246-RA;ID=Cnem033246-RA:cds_dup302
tig02186482	maker	CDS	219155	219308	.	+	0	ID=Cnem033246-RA:cds;Parent=Cnem033246-RA
tig02186482	maker	CDS	231280	231409	.	+	2	Parent=Cnem033246-RA;ID=Cnem033246-RA:cds_dup304
tig02186482	maker	CDS	224313	224558	.	+	2	Parent=Cnem033246-RA;ID=Cnem033246-RA:cds_dup303
tig02186482	maker	CDS	233807	234017	.	+	1	Parent=Cnem033246-RA;ID=Cnem033246-RA:cds_dup305
tig02186482	maker	exon	233807	234017	.	+	.	Parent=Cnem033246-RA;ID=Cnem033246-RA:exon:500103
tig02186482	maker	exon	224313	224558	.	+	.	ID=Cnem033246-RA:exon:500101;Parent=Cnem033246-RA
tig02186482	maker	exon	231280	231409	.	+	.	ID=Cnem033246-RA:exon:500102;Parent=Cnem033246-RA
tig02186482	maker	exon	219155	219308	.	+	.	ID=Cnem033246-RA:exon:500099;Parent=Cnem033246-RA
tig02186482	maker	exon	220259	220378	.	+	.	ID=Cnem033246-RA:exon:500100;Parent=Cnem033246-RA
tig02186482	maker	gene	182145	202549	.	+	.	Name=Cnem033243;ID=Cnem033243;Alias=maker-tig02186482-snap-gene-0.89
tig02186482	maker	mRNA	182145	202549	.	+	.	_eAED=0.30;Name=Cnem033243-RA;Parent=Cnem033243;ID=Cnem033243-RA;_AED=0.30;Alias=maker-tig02186482-snap-gene-0.89-mRNA-1;_QI=0|0.66|0.5|0.9|0.44|0.6|10|0|480
tig02186482	maker	CDS	197341	197466	.	+	2	ID=Cnem033243-RA:cds_dup310;Parent=Cnem033243-RA
tig02186482	maker	CDS	182145	182312	.	+	0	ID=Cnem033243-RA:cds;Parent=Cnem033243-RA
tig02186482	maker	CDS	191692	191937	.	+	2	ID=Cnem033243-RA:cds_dup308;Parent=Cnem033243-RA
tig02186482	maker	CDS	199049	199162	.	+	2	Parent=Cnem033243-RA;ID=Cnem033243-RA:cds_dup311
tig02186482	maker	CDS	184218	184308	.	+	0	Parent=Cnem033243-RA;ID=Cnem033243-RA:cds_dup307
tig02186482	maker	CDS	201366	201553	.	+	2	Parent=Cnem033243-RA;ID=Cnem033243-RA:cds_dup313
tig02186482	maker	CDS	202427	202549	.	+	0	ID=Cnem033243-RA:cds_dup314;Parent=Cnem033243-RA
tig02186482	maker	CDS	182834	182956	.	+	0	ID=Cnem033243-RA:cds_dup306;Parent=Cnem033243-RA
tig02186482	maker	CDS	193257	193388	.	+	2	Parent=Cnem033243-RA;ID=Cnem033243-RA:cds_dup309
tig02186482	maker	CDS	200953	201084	.	+	2	Parent=Cnem033243-RA;ID=Cnem033243-RA:cds_dup312
tig02186482	maker	exon	200953	201084	.	+	.	ID=Cnem033243-RA:exon:500111;Parent=Cnem033243-RA
tig02186482	maker	exon	201366	201553	.	+	.	ID=Cnem033243-RA:exon:500112;Parent=Cnem033243-RA
tig02186482	maker	exon	202427	202549	.	+	.	Parent=Cnem033243-RA;ID=Cnem033243-RA:exon:500113
tig02186482	maker	exon	182834	182956	.	+	.	Parent=Cnem033243-RA;ID=Cnem033243-RA:exon:500105
tig02186482	maker	exon	197341	197466	.	+	.	Parent=Cnem033243-RA;ID=Cnem033243-RA:exon:500109
tig02186482	maker	exon	191692	191937	.	+	.	ID=Cnem033243-RA:exon:500107;Parent=Cnem033243-RA
tig02186482	maker	exon	193257	193388	.	+	.	ID=Cnem033243-RA:exon:500108;Parent=Cnem033243-RA
tig02186482	maker	exon	182145	182312	.	+	.	Parent=Cnem033243-RA;ID=Cnem033243-RA:exon:500104
tig02186482	maker	exon	184218	184308	.	+	.	ID=Cnem033243-RA:exon:500106;Parent=Cnem033243-RA
tig02186482	maker	exon	199049	199162	.	+	.	ID=Cnem033243-RA:exon:500110;Parent=Cnem033243-RA
tig02186482	maker	gene	116973	127821	.	-	.	Alias=snap-tig02186482-processed-gene-0.43;ID=Cnem033241;Name=Cnem033241
tig02186482	maker	mRNA	116973	127821	.	-	.	Parent=Cnem033241;_eAED=0.43;Name=Cnem033241-RA;_QI=0|0|0|0.25|1|1|4|0|159;_AED=0.43;ID=Cnem033241-RA;Alias=snap-tig02186482-processed-gene-0.43-mRNA-1
tig02186482	maker	CDS	116973	117113	.	-	0	ID=Cnem033241-RA:cds_dup322;Parent=Cnem033241-RA
tig02186482	maker	CDS	121493	121529	.	-	1	Parent=Cnem033241-RA;ID=Cnem033241-RA:cds_dup321
tig02186482	maker	CDS	123238	123371	.	-	0	Parent=Cnem033241-RA;ID=Cnem033241-RA:cds_dup320
tig02186482	maker	CDS	127654	127821	.	-	0	Parent=Cnem033241-RA;ID=Cnem033241-RA:cds
tig02186482	maker	exon	116973	117113	.	-	.	ID=Cnem033241-RA:exon:500133;Parent=Cnem033241-RA
tig02186482	maker	exon	127654	127821	.	-	.	Parent=Cnem033241-RA;ID=Cnem033241-RA:exon:500136
tig02186482	maker	exon	121493	121529	.	-	.	ID=Cnem033241-RA:exon:500134;Parent=Cnem033241-RA
tig02186482	maker	exon	123238	123371	.	-	.	Parent=Cnem033241-RA;ID=Cnem033241-RA:exon:500135
tig02186482	maker	gene	89962	90596	.	-	.	ID=Cnem033238;Alias=maker-tig02186482-snap-gene-0.91;Name=Cnem033238
tig02186482	maker	mRNA	89962	90596	.	-	.	Parent=Cnem033238;_eAED=0.30;Name=Cnem033238-RA;_QI=0|0|0|1|0|0|3|0|199;ID=Cnem033238-RA;_AED=0.39;Alias=maker-tig02186482-snap-gene-0.91-mRNA-1
tig02186482	maker	CDS	89962	90110	.	-	2	ID=Cnem033238-RA:cds_dup324;Parent=Cnem033238-RA
tig02186482	maker	CDS	90130	90358	.	-	0	Parent=Cnem033238-RA;ID=Cnem033238-RA:cds_dup323
tig02186482	maker	CDS	90375	90596	.	-	0	Parent=Cnem033238-RA;ID=Cnem033238-RA:cds
tig02186482	maker	exon	89962	90110	.	-	.	ID=Cnem033238-RA:exon:500145;Parent=Cnem033238-RA
tig02186482	maker	exon	90375	90596	.	-	.	ID=Cnem033238-RA:exon:500147;Parent=Cnem033238-RA
tig02186482	maker	exon	90130	90358	.	-	.	Parent=Cnem033238-RA;ID=Cnem033238-RA:exon:500146
tig02186482	maker	gene	395120	398581	.	+	.	ID=Cnem033258;Alias=maker-tig02186482-augustus-gene-1.166;Name=Cnem033258
tig02186482	maker	mRNA	395120	398581	.	+	.	_QI=0|0|0|0.75|0.66|0.75|4|0|497;Alias=maker-tig02186482-augustus-gene-1.166-mRNA-1;_AED=0.49;ID=Cnem033258-RA;Parent=Cnem033258;_eAED=0.13;Name=Cnem033258-RA
tig02186482	maker	CDS	398129	398581	.	+	0	Parent=Cnem033258-RA;ID=Cnem033258-RA:cds_dup331
tig02186482	maker	CDS	395414	395684	.	+	0	ID=Cnem033258-RA:cds_dup329;Parent=Cnem033258-RA
tig02186482	maker	CDS	396523	397178	.	+	2	Parent=Cnem033258-RA;ID=Cnem033258-RA:cds_dup330
tig02186482	maker	CDS	395120	395233	.	+	0	Parent=Cnem033258-RA;ID=Cnem033258-RA:cds
tig02186482	maker	exon	396523	397178	.	+	.	Parent=Cnem033258-RA;ID=Cnem033258-RA:exon:500157
tig02186482	maker	exon	395120	395233	.	+	.	Parent=Cnem033258-RA;ID=Cnem033258-RA:exon:500155
tig02186482	maker	exon	395414	395684	.	+	.	Parent=Cnem033258-RA;ID=Cnem033258-RA:exon:500156
tig02186482	maker	exon	398129	398581	.	+	.	Parent=Cnem033258-RA;ID=Cnem033258-RA:exon:500158
tig02186482	maker	gene	546035	568925	.	+	.	Name=Cnem033263;ID=Cnem033263;Alias=maker-tig02186482-augustus-gene-1.168
tig02186482	maker	mRNA	546035	568925	.	+	.	_QI=0|0.22|0.4|0.8|0.33|0.4|10|507|361;_AED=0.31;Alias=maker-tig02186482-augustus-gene-1.168-mRNA-1;ID=Cnem033263-RA;Parent=Cnem033263;_eAED=0.34;Name=Cnem033263-RA
tig02186482	maker	CDS	551003	551112	.	+	2	Parent=Cnem033263-RA;ID=Cnem033263-RA:cds_dup336
tig02186482	maker	CDS	557553	557681	.	+	2	ID=Cnem033263-RA:cds_dup338;Parent=Cnem033263-RA
tig02186482	maker	CDS	562377	562503	.	+	2	ID=Cnem033263-RA:cds_dup340;Parent=Cnem033263-RA
tig02186482	maker	CDS	568316	568418	.	+	1	ID=Cnem033263-RA:cds_dup342;Parent=Cnem033263-RA
tig02186482	maker	CDS	558600	558707	.	+	2	Parent=Cnem033263-RA;ID=Cnem033263-RA:cds_dup339
tig02186482	maker	CDS	565573	565719	.	+	1	Parent=Cnem033263-RA;ID=Cnem033263-RA:cds_dup341
tig02186482	maker	CDS	552071	552185	.	+	0	ID=Cnem033263-RA:cds_dup337;Parent=Cnem033263-RA
tig02186482	maker	CDS	546035	546086	.	+	0	ID=Cnem033263-RA:cds;Parent=Cnem033263-RA
tig02186482	maker	CDS	546685	546814	.	+	2	Parent=Cnem033263-RA;ID=Cnem033263-RA:cds_dup334
tig02186482	maker	CDS	550706	550770	.	+	1	ID=Cnem033263-RA:cds_dup335;Parent=Cnem033263-RA
tig02186482	maker	exon	558600	558707	.	+	.	ID=Cnem033263-RA:exon:500170;Parent=Cnem033263-RA
tig02186482	maker	exon	557553	557681	.	+	.	Parent=Cnem033263-RA;ID=Cnem033263-RA:exon:500169
tig02186482	maker	exon	565573	565719	.	+	.	Parent=Cnem033263-RA;ID=Cnem033263-RA:exon:500172
tig02186482	maker	exon	568316	568925	.	+	.	Parent=Cnem033263-RA;ID=Cnem033263-RA:exon:500173
tig02186482	maker	exon	562377	562503	.	+	.	Parent=Cnem033263-RA;ID=Cnem033263-RA:exon:500171
tig02186482	maker	exon	551003	551112	.	+	.	ID=Cnem033263-RA:exon:500167;Parent=Cnem033263-RA
tig02186482	maker	exon	546685	546814	.	+	.	ID=Cnem033263-RA:exon:500165;Parent=Cnem033263-RA
tig02186482	maker	exon	552071	552185	.	+	.	Parent=Cnem033263-RA;ID=Cnem033263-RA:exon:500168
tig02186482	maker	exon	550706	550770	.	+	.	ID=Cnem033263-RA:exon:500166;Parent=Cnem033263-RA
tig02186482	maker	exon	546035	546086	.	+	.	ID=Cnem033263-RA:exon:500164;Parent=Cnem033263-RA
tig02186482	maker	gene	575656	587896	.	+	.	Name=Cnem033264;Alias=augustus-tig02186482-processed-gene-1.121;ID=Cnem033264
tig02186482	maker	mRNA	575656	587896	.	+	.	Parent=Cnem033264;Name=Cnem033264-RA;_eAED=0.47;_QI=0|0|0|1|1|1|6|291|415;_AED=0.45;Alias=augustus-tig02186482-processed-gene-1.121-mRNA-1;ID=Cnem033264-RA
tig02186482	maker	CDS	581611	581852	.	+	2	Parent=Cnem033264-RA;ID=Cnem033264-RA:cds_dup346
tig02186482	maker	CDS	585931	586176	.	+	2	ID=Cnem033264-RA:cds_dup349;Parent=Cnem033264-RA
tig02186482	maker	CDS	585641	585766	.	+	2	Parent=Cnem033264-RA;ID=Cnem033264-RA:cds_dup348
tig02186482	maker	CDS	581935	582064	.	+	0	ID=Cnem033264-RA:cds_dup347;Parent=Cnem033264-RA
tig02186482	maker	CDS	587604	587605	.	+	2	ID=Cnem033264-RA:cds_dup350;Parent=Cnem033264-RA
tig02186482	maker	CDS	575656	576157	.	+	0	ID=Cnem033264-RA:cds;Parent=Cnem033264-RA
tig02186482	maker	exon	587604	587896	.	+	.	Parent=Cnem033264-RA;ID=Cnem033264-RA:exon:500186
tig02186482	maker	exon	585931	586176	.	+	.	ID=Cnem033264-RA:exon:500185;Parent=Cnem033264-RA
tig02186482	maker	exon	575656	576157	.	+	.	Parent=Cnem033264-RA;ID=Cnem033264-RA:exon:500181
tig02186482	maker	exon	585641	585766	.	+	.	ID=Cnem033264-RA:exon:500184;Parent=Cnem033264-RA
tig02186482	maker	exon	581935	582064	.	+	.	ID=Cnem033264-RA:exon:500183;Parent=Cnem033264-RA
tig02186482	maker	exon	581611	581852	.	+	.	Parent=Cnem033264-RA;ID=Cnem033264-RA:exon:500182
tig02186482	maker	gene	311576	312697	.	-	.	ID=Cnem033250;Alias=snap-tig02186482-processed-gene-1.52;Name=Cnem033250
tig02186482	maker	mRNA	311576	312697	.	-	.	_eAED=0.14;Name=Cnem033250-RA;Parent=Cnem033250;_AED=0.14;ID=Cnem033250-RA;Alias=snap-tig02186482-processed-gene-1.52-mRNA-1;_QI=0|-1|0|1|-1|1|1|0|373
tig02186482	maker	exon	311576	312697	.	-	.	ID=Cnem033250-RA:exon:500218;Parent=Cnem033250-RA
tig02186482	maker	CDS	311576	312697	.	-	0	ID=Cnem033250-RA:cds;Parent=Cnem033250-RA
tig02186482	maker	gene	541904	543649	.	-	.	ID=Cnem033261;Alias=maker-tig02186482-snap-gene-1.191;Name=Cnem033261
tig02186482	maker	mRNA	541904	543649	.	-	.	_eAED=0.84;Name=Cnem033261-RA;Parent=Cnem033261;_AED=0.48;ID=Cnem033261-RA;Alias=maker-tig02186482-snap-gene-1.191-mRNA-1;_QI=0|0|0|0.5|0.33|0.5|4|0|357
tig02186482	maker	exon	541904	542134	.	-	.	Parent=Cnem033261-RA;ID=Cnem033261-RA:exon:500225
tig02186482	maker	exon	543218	543649	.	-	.	Parent=Cnem033261-RA;ID=Cnem033261-RA:exon:500228
tig02186482	maker	exon	542434	542617	.	-	.	Parent=Cnem033261-RA;ID=Cnem033261-RA:exon:500226
tig02186482	maker	exon	542966	543192	.	-	.	Parent=Cnem033261-RA;ID=Cnem033261-RA:exon:500227
tig02186482	maker	CDS	542434	542617	.	-	1	Parent=Cnem033261-RA;ID=Cnem033261-RA:cds_dup356
tig02186482	maker	CDS	541904	542134	.	-	0	ID=Cnem033261-RA:cds_dup357;Parent=Cnem033261-RA
tig02186482	maker	CDS	542966	543192	.	-	0	Parent=Cnem033261-RA;ID=Cnem033261-RA:cds_dup355
tig02186482	maker	CDS	543218	543649	.	-	0	Parent=Cnem033261-RA;ID=Cnem033261-RA:cds
tig02186482	maker	gene	473125	478448	.	-	.	Alias=maker-tig02186482-snap-gene-1.190;ID=Cnem033260;Name=Cnem033260
tig02186482	maker	mRNA	473125	478448	.	-	.	_AED=0.14;ID=Cnem033260-RA;Alias=maker-tig02186482-snap-gene-1.190-mRNA-1;_QI=0|0|0|0.5|0|0|2|0|1664;Name=Cnem033260-RA;_eAED=-0.06;Parent=Cnem033260
tig02186482	maker	exon	473125	477353	.	-	.	ID=Cnem033260-RA:exon:500238;Parent=Cnem033260-RA
tig02186482	maker	exon	477683	478448	.	-	.	Parent=Cnem033260-RA;ID=Cnem033260-RA:exon:500239
tig02186482	maker	CDS	473125	477353	.	-	2	Parent=Cnem033260-RA;ID=Cnem033260-RA:cds_dup358
tig02186482	maker	CDS	477683	478448	.	-	0	ID=Cnem033260-RA:cds;Parent=Cnem033260-RA
ctg12201	maker	gene	4300	14936	.	-	.	Name=Cnem087026;Alias=maker-ctg12201-augustus-gene-0.127;ID=Cnem087026
ctg12201	maker	mRNA	4300	14936	.	-	.	_QI=0|0.75|0.4|0.8|0.5|0.8|5|0|215;_AED=0.12;Alias=maker-ctg12201-augustus-gene-0.127-mRNA-1;ID=Cnem087026-RA;Parent=Cnem087026;_eAED=0.12;Name=Cnem087026-RA
ctg12201	maker	CDS	7292	7389	.	-	0	Parent=Cnem087026-RA;ID=Cnem087026-RA:cds_dup366
ctg12201	maker	CDS	14880	14936	.	-	0	ID=Cnem087026-RA:cds;Parent=Cnem087026-RA
ctg12201	maker	CDS	13756	13893	.	-	0	ID=Cnem087026-RA:cds_dup364;Parent=Cnem087026-RA
ctg12201	maker	CDS	8970	9152	.	-	0	Parent=Cnem087026-RA;ID=Cnem087026-RA:cds_dup365
ctg12201	maker	CDS	4300	4468	.	-	1	ID=Cnem087026-RA:cds_dup367;Parent=Cnem087026-RA
ctg12201	maker	exon	8970	9152	.	-	.	Parent=Cnem087026-RA;ID=Cnem087026-RA:exon:623993
ctg12201	maker	exon	4300	4468	.	-	.	ID=Cnem087026-RA:exon:623991;Parent=Cnem087026-RA
ctg12201	maker	exon	14880	14936	.	-	.	ID=Cnem087026-RA:exon:623995;Parent=Cnem087026-RA
ctg12201	maker	exon	7292	7389	.	-	.	ID=Cnem087026-RA:exon:623992;Parent=Cnem087026-RA
ctg12201	maker	exon	13756	13893	.	-	.	ID=Cnem087026-RA:exon:623994;Parent=Cnem087026-RA
ctg12201	maker	gene	234114	235734	.	-	.	Alias=maker-ctg12201-snap-gene-0.148;ID=Cnem087039;Name=Cnem087039
ctg12201	maker	mRNA	234114	235734	.	-	.	Parent=Cnem087039;Name=Cnem087039-RA;_eAED=0.25;_QI=0|0|0|1|0.5|0.33|3|0|507;_AED=0.11;ID=Cnem087039-RA;Alias=maker-ctg12201-snap-gene-0.148-mRNA-1
ctg12201	maker	exon	235313	235734	.	-	.	ID=Cnem087039-RA:exon:624004;Parent=Cnem087039-RA
ctg12201	maker	exon	234114	234440	.	-	.	ID=Cnem087039-RA:exon:624002;Parent=Cnem087039-RA
ctg12201	maker	exon	234477	235248	.	-	.	ID=Cnem087039-RA:exon:624003;Parent=Cnem087039-RA
ctg12201	maker	CDS	234477	235248	.	-	1	ID=Cnem087039-RA:cds_dup372;Parent=Cnem087039-RA
ctg12201	maker	CDS	234114	234440	.	-	0	ID=Cnem087039-RA:cds_dup373;Parent=Cnem087039-RA
ctg12201	maker	CDS	235313	235734	.	-	0	Parent=Cnem087039-RA;ID=Cnem087039-RA:cds
ctg12201	maker	gene	319450	321604	.	-	.	ID=Cnem087042;Alias=maker-ctg12201-snap-gene-0.151;Name=Cnem087042
ctg12201	maker	mRNA	319450	321604	.	-	.	_QI=0|0|0|0.85|0|0.14|7|0|375;Alias=maker-ctg12201-snap-gene-0.151-mRNA-1;_AED=0.31;ID=Cnem087042-RA;Parent=Cnem087042;Name=Cnem087042-RA;_eAED=0.42
ctg12201	maker	CDS	320619	320689	.	-	0	ID=Cnem087042-RA:cds_dup376;Parent=Cnem087042-RA
ctg12201	maker	CDS	320744	321002	.	-	1	Parent=Cnem087042-RA;ID=Cnem087042-RA:cds_dup375
ctg12201	maker	CDS	321532	321604	.	-	0	Parent=Cnem087042-RA;ID=Cnem087042-RA:cds
ctg12201	maker	CDS	320320	320595	.	-	1	Parent=Cnem087042-RA;ID=Cnem087042-RA:cds_dup377
ctg12201	maker	CDS	319450	319650	.	-	0	Parent=Cnem087042-RA;ID=Cnem087042-RA:cds_dup379
ctg12201	maker	CDS	321015	321153	.	-	2	ID=Cnem087042-RA:cds_dup374;Parent=Cnem087042-RA
ctg12201	maker	CDS	319688	319796	.	-	1	Parent=Cnem087042-RA;ID=Cnem087042-RA:cds_dup378
ctg12201	maker	exon	319688	319796	.	-	.	Parent=Cnem087042-RA;ID=Cnem087042-RA:exon:624007
ctg12201	maker	exon	319450	319650	.	-	.	ID=Cnem087042-RA:exon:624006;Parent=Cnem087042-RA
ctg12201	maker	exon	320320	320595	.	-	.	Parent=Cnem087042-RA;ID=Cnem087042-RA:exon:624008
ctg12201	maker	exon	320619	320689	.	-	.	ID=Cnem087042-RA:exon:624009;Parent=Cnem087042-RA
ctg12201	maker	exon	321532	321604	.	-	.	ID=Cnem087042-RA:exon:624012;Parent=Cnem087042-RA
ctg12201	maker	exon	321015	321153	.	-	.	ID=Cnem087042-RA:exon:624011;Parent=Cnem087042-RA
ctg12201	maker	exon	320744	321002	.	-	.	Parent=Cnem087042-RA;ID=Cnem087042-RA:exon:624010
ctg12201	maker	gene	56319	57030	.	-	.	ID=Cnem087030;Alias=snap-ctg12201-processed-gene-0.40;Name=Cnem087030
ctg12201	maker	mRNA	56319	57030	.	-	.	_QI=0|0|0|0.33|1|1|3|0|158;_AED=0.49;ID=Cnem087030-RA;Alias=snap-ctg12201-processed-gene-0.40-mRNA-1;Parent=Cnem087030;_eAED=0.49;Name=Cnem087030-RA
ctg12201	maker	CDS	56319	56428	.	-	2	ID=Cnem087030-RA:cds_dup381;Parent=Cnem087030-RA
ctg12201	maker	CDS	56579	56694	.	-	1	Parent=Cnem087030-RA;ID=Cnem087030-RA:cds_dup380
ctg12201	maker	CDS	56780	57030	.	-	0	Parent=Cnem087030-RA;ID=Cnem087030-RA:cds
ctg12201	maker	exon	56579	56694	.	-	.	ID=Cnem087030-RA:exon:624016;Parent=Cnem087030-RA
ctg12201	maker	exon	56319	56428	.	-	.	ID=Cnem087030-RA:exon:624015;Parent=Cnem087030-RA
ctg12201	maker	exon	56780	57030	.	-	.	Parent=Cnem087030-RA;ID=Cnem087030-RA:exon:624017
ctg12201	maker	gene	59991	62721	.	+	.	Name=Cnem087031;ID=Cnem087031;Alias=maker-ctg12201-snap-gene-0.136
ctg12201	maker	mRNA	59991	62721	.	+	.	Name=Cnem087031-RA;_eAED=0.06;Parent=Cnem087031;Alias=maker-ctg12201-snap-gene-0.136-mRNA-1;_AED=0.13;ID=Cnem087031-RA;_QI=0|0|0|1|0|0|3|0|681
ctg12201	maker	exon	59991	60208	.	+	.	Parent=Cnem087031-RA;ID=Cnem087031-RA:exon:624031
ctg12201	maker	exon	61899	62721	.	+	.	Parent=Cnem087031-RA;ID=Cnem087031-RA:exon:624033
ctg12201	maker	exon	60277	61281	.	+	.	ID=Cnem087031-RA:exon:624032;Parent=Cnem087031-RA
ctg12201	maker	CDS	59991	60208	.	+	0	ID=Cnem087031-RA:cds;Parent=Cnem087031-RA
ctg12201	maker	CDS	61899	62721	.	+	1	ID=Cnem087031-RA:cds_dup387;Parent=Cnem087031-RA
ctg12201	maker	CDS	60277	61281	.	+	1	ID=Cnem087031-RA:cds_dup386;Parent=Cnem087031-RA
ctg12201	maker	gene	211356	212974	.	-	.	Name=Cnem087038;ID=Cnem087038;Alias=maker-ctg12201-snap-gene-0.147
ctg12201	maker	mRNA	211356	212974	.	-	.	Parent=Cnem087038;Name=Cnem087038-RA;_eAED=0.52;_QI=0|0|0|1|0|0|3|0|515;_AED=0.23;ID=Cnem087038-RA;Alias=maker-ctg12201-snap-gene-0.147-mRNA-1
ctg12201	maker	exon	211356	211813	.	-	.	Parent=Cnem087038-RA;ID=Cnem087038-RA:exon:624034
ctg12201	maker	exon	211822	212093	.	-	.	Parent=Cnem087038-RA;ID=Cnem087038-RA:exon:624035
ctg12201	maker	exon	212157	212974	.	-	.	Parent=Cnem087038-RA;ID=Cnem087038-RA:exon:624036
ctg12201	maker	CDS	212157	212974	.	-	0	ID=Cnem087038-RA:cds;Parent=Cnem087038-RA
ctg12201	maker	CDS	211356	211813	.	-	2	Parent=Cnem087038-RA;ID=Cnem087038-RA:cds_dup389
ctg12201	maker	CDS	211822	212093	.	-	1	Parent=Cnem087038-RA;ID=Cnem087038-RA:cds_dup388
ctg18121	maker	gene	45114	45671	.	-	.	Name=Cnem146940;Alias=maker-ctg18121-snap-gene-0.27;ID=Cnem146940
ctg18121	maker	mRNA	45114	45671	.	-	.	_QI=0|0|0|1|1|1|2|0|173;_AED=0.31;Alias=maker-ctg18121-snap-gene-0.27-mRNA-1;ID=Cnem146940-RA;Parent=Cnem146940;_eAED=0.31;Name=Cnem146940-RA
ctg18121	maker	CDS	45114	45263	.	-	0	Parent=Cnem146940-RA;ID=Cnem146940-RA:cds_dup391
ctg18121	maker	CDS	45300	45671	.	-	0	ID=Cnem146940-RA:cds;Parent=Cnem146940-RA
ctg18121	maker	exon	45114	45263	.	-	.	Parent=Cnem146940-RA;ID=Cnem146940-RA:exon:55925
ctg18121	maker	exon	45300	45671	.	-	.	Parent=Cnem146940-RA;ID=Cnem146940-RA:exon:55926
ctg18121	maker	gene	38137	43381	.	-	.	Alias=maker-ctg18121-snap-gene-0.26;ID=Cnem146939;Name=Cnem146939
ctg18121	maker	mRNA	38137	43381	.	-	.	_eAED=0.37;Name=Cnem146939-RA;Parent=Cnem146939;_AED=0.41;Alias=maker-ctg18121-snap-gene-0.26-mRNA-1;ID=Cnem146939-RA;_QI=0|0|0|0.66|0|0.33|3|0|226
ctg18121	maker	exon	43233	43381	.	-	.	ID=Cnem146939-RA:exon:55929;Parent=Cnem146939-RA
ctg18121	maker	exon	38317	38704	.	-	.	ID=Cnem146939-RA:exon:55928;Parent=Cnem146939-RA
ctg18121	maker	exon	38137	38280	.	-	.	ID=Cnem146939-RA:exon:55927;Parent=Cnem146939-RA
ctg18121	maker	CDS	43233	43381	.	-	0	Parent=Cnem146939-RA;ID=Cnem146939-RA:cds
ctg18121	maker	CDS	38137	38280	.	-	0	ID=Cnem146939-RA:cds_dup393;Parent=Cnem146939-RA
ctg18121	maker	CDS	38317	38704	.	-	1	ID=Cnem146939-RA:cds_dup392;Parent=Cnem146939-RA
ctg17679	maker	gene	34175	35037	.	-	.	Alias=maker-ctg17679-snap-gene-0.39;ID=Cnem145925;Name=Cnem145925
ctg17679	maker	mRNA	34175	35037	.	-	.	_eAED=0.16;Name=Cnem145925-RA;Parent=Cnem145925;_AED=0.35;Alias=maker-ctg17679-snap-gene-0.39-mRNA-1;ID=Cnem145925-RA;_QI=0|0|0|0.66|0.5|0.33|3|0|179
ctg17679	maker	exon	34849	34923	.	-	.	ID=Cnem145925-RA:exon:241273;Parent=Cnem145925-RA
ctg17679	maker	exon	34175	34581	.	-	.	ID=Cnem145925-RA:exon:241272;Parent=Cnem145925-RA
ctg17679	maker	exon	34980	35037	.	-	.	ID=Cnem145925-RA:exon:241274;Parent=Cnem145925-RA
ctg17679	maker	CDS	34980	35037	.	-	0	ID=Cnem145925-RA:cds;Parent=Cnem145925-RA
ctg17679	maker	CDS	34849	34923	.	-	2	ID=Cnem145925-RA:cds_dup395;Parent=Cnem145925-RA
ctg17679	maker	CDS	34175	34581	.	-	2	Parent=Cnem145925-RA;ID=Cnem145925-RA:cds_dup396
ctg17679	maker	gene	1251	8640	.	-	.	Name=Cnem145923;Alias=maker-ctg17679-snap-gene-0.38;ID=Cnem145923
ctg17679	maker	mRNA	1251	8640	.	-	.	_QI=0|0|0|0.66|0|0|3|0|235;ID=Cnem145923-RA;_AED=0.20;Alias=maker-ctg17679-snap-gene-0.38-mRNA-1;Parent=Cnem145923;Name=Cnem145923-RA;_eAED=0.04
ctg17679	maker	exon	1251	1532	.	-	.	Parent=Cnem145923-RA;ID=Cnem145923-RA:exon:241281
ctg17679	maker	exon	1567	1880	.	-	.	ID=Cnem145923-RA:exon:241282;Parent=Cnem145923-RA
ctg17679	maker	exon	8529	8640	.	-	.	ID=Cnem145923-RA:exon:241283;Parent=Cnem145923-RA
ctg17679	maker	CDS	1251	1532	.	-	0	Parent=Cnem145923-RA;ID=Cnem145923-RA:cds_dup398
ctg17679	maker	CDS	1567	1880	.	-	2	Parent=Cnem145923-RA;ID=Cnem145923-RA:cds_dup397
ctg17679	maker	CDS	8529	8640	.	-	0	ID=Cnem145923-RA:cds;Parent=Cnem145923-RA
ctg4346	maker	gene	80795	81472	.	+	.	Name=Cnem131832;ID=Cnem131832;Alias=maker-ctg4346-snap-gene-0.5
ctg4346	maker	mRNA	80795	81472	.	+	.	Parent=Cnem131832;_eAED=0.38;Name=Cnem131832-RA;_QI=0|0|0|1|0|0.5|2|0|221;_AED=0.38;ID=Cnem131832-RA;Alias=maker-ctg4346-snap-gene-0.5-mRNA-1
ctg4346	maker	exon	81218	81472	.	+	.	Parent=Cnem131832-RA;ID=Cnem131832-RA:exon:386212
ctg4346	maker	exon	80795	81205	.	+	.	ID=Cnem131832-RA:exon:386211;Parent=Cnem131832-RA
ctg4346	maker	CDS	80795	81205	.	+	0	Parent=Cnem131832-RA;ID=Cnem131832-RA:cds
ctg4346	maker	CDS	81218	81472	.	+	0	ID=Cnem131832-RA:cds_dup404;Parent=Cnem131832-RA
ctg4346	maker	gene	14516	21401	.	-	.	ID=Cnem131824;Alias=maker-ctg4346-snap-gene-0.7;Name=Cnem131824
ctg4346	maker	mRNA	14516	21401	.	-	.	Parent=Cnem131824;Name=Cnem131824-RA;_eAED=0.24;_QI=0|0|0|0.75|0|0.25|4|0|905;_AED=0.30;Alias=maker-ctg4346-snap-gene-0.7-mRNA-1;ID=Cnem131824-RA
ctg4346	maker	exon	18032	18164	.	-	.	ID=Cnem131824-RA:exon:386226;Parent=Cnem131824-RA
ctg4346	maker	exon	20372	21401	.	-	.	ID=Cnem131824-RA:exon:386227;Parent=Cnem131824-RA
ctg4346	maker	exon	14516	15429	.	-	.	ID=Cnem131824-RA:exon:386224;Parent=Cnem131824-RA
ctg4346	maker	exon	16704	17344	.	-	.	Parent=Cnem131824-RA;ID=Cnem131824-RA:exon:386225
ctg4346	maker	CDS	18032	18164	.	-	2	ID=Cnem131824-RA:cds_dup407;Parent=Cnem131824-RA
ctg4346	maker	CDS	14516	15429	.	-	2	ID=Cnem131824-RA:cds_dup409;Parent=Cnem131824-RA
ctg4346	maker	CDS	16704	17344	.	-	1	ID=Cnem131824-RA:cds_dup408;Parent=Cnem131824-RA
ctg4346	maker	CDS	20372	21401	.	-	0	Parent=Cnem131824-RA;ID=Cnem131824-RA:cds
ctg4346	maker	gene	74002	74791	.	+	.	ID=Cnem131830;Alias=maker-ctg4346-snap-gene-0.4;Name=Cnem131830
ctg4346	maker	mRNA	74002	74791	.	+	.	Alias=maker-ctg4346-snap-gene-0.4-mRNA-1;_AED=0.49;ID=Cnem131830-RA;_QI=0|0|0|0.5|0|0|2|0|253;Name=Cnem131830-RA;_eAED=0.49;Parent=Cnem131830
ctg4346	maker	exon	74002	74149	.	+	.	ID=Cnem131830-RA:exon:386236;Parent=Cnem131830-RA
ctg4346	maker	exon	74178	74791	.	+	.	ID=Cnem131830-RA:exon:386237;Parent=Cnem131830-RA
ctg4346	maker	CDS	74002	74149	.	+	0	Parent=Cnem131830-RA;ID=Cnem131830-RA:cds
ctg4346	maker	CDS	74178	74791	.	+	2	ID=Cnem131830-RA:cds_dup411;Parent=Cnem131830-RA
ctg13582	maker	gene	755	14914	.	+	.	Name=Cnem153766;ID=Cnem153766;Alias=maker-ctg13582-snap-gene-0.0
ctg13582	maker	mRNA	755	14914	.	+	.	Parent=Cnem153766;Name=Cnem153766-RA;_eAED=0.28;_QI=0|0|0|0.25|1|1|4|0|278;_AED=0.45;Alias=maker-ctg13582-snap-gene-0.0-mRNA-1;ID=Cnem153766-RA
ctg13582	maker	exon	755	842	.	+	.	ID=Cnem153766-RA:exon:421421;Parent=Cnem153766-RA
ctg13582	maker	exon	8021	8214	.	+	.	ID=Cnem153766-RA:exon:421423;Parent=Cnem153766-RA
ctg13582	maker	exon	14482	14914	.	+	.	Parent=Cnem153766-RA;ID=Cnem153766-RA:exon:421424
ctg13582	maker	exon	5538	5659	.	+	.	ID=Cnem153766-RA:exon:421422;Parent=Cnem153766-RA
ctg13582	maker	CDS	5538	5659	.	+	2	ID=Cnem153766-RA:cds_dup412;Parent=Cnem153766-RA
ctg13582	maker	CDS	8021	8214	.	+	0	ID=Cnem153766-RA:cds_dup413;Parent=Cnem153766-RA
ctg13582	maker	CDS	14482	14914	.	+	1	Parent=Cnem153766-RA;ID=Cnem153766-RA:cds_dup414
ctg13582	maker	CDS	755	842	.	+	0	Parent=Cnem153766-RA;ID=Cnem153766-RA:cds
ctg4526	maker	gene	53344	100129	.	+	.	Alias=maker-ctg4526-snap-gene-0.55;ID=Cnem127975;Name=Cnem127975
ctg4526	maker	mRNA	53344	100129	.	+	.	Parent=Cnem127975;Name=Cnem127975-RA;_eAED=0.27;_QI=105|0.92|0.85|1|0.46|0.5|14|15|739;_AED=0.27;ID=Cnem127975-RA;Alias=maker-ctg4526-snap-gene-0.55-mRNA-1
ctg4526	maker	CDS	73919	74008	.	+	2	Parent=Cnem127975-RA;ID=Cnem127975-RA:cds_dup419
ctg4526	maker	CDS	76458	76512	.	+	2	Parent=Cnem127975-RA;ID=Cnem127975-RA:cds_dup420
ctg4526	maker	CDS	62229	62372	.	+	0	Parent=Cnem127975-RA;ID=Cnem127975-RA:cds_dup417
ctg4526	maker	CDS	93162	93410	.	+	0	Parent=Cnem127975-RA;ID=Cnem127975-RA:cds_dup426
ctg4526	maker	CDS	53449	53577	.	+	0	Parent=Cnem127975-RA;ID=Cnem127975-RA:cds
ctg4526	maker	CDS	99956	100114	.	+	0	ID=Cnem127975-RA:cds_dup429;Parent=Cnem127975-RA
ctg4526	maker	CDS	83696	83828	.	+	1	Parent=Cnem127975-RA;ID=Cnem127975-RA:cds_dup422
ctg4526	maker	CDS	64765	64990	.	+	0	ID=Cnem127975-RA:cds_dup418;Parent=Cnem127975-RA
ctg4526	maker	CDS	90163	90378	.	+	0	Parent=Cnem127975-RA;ID=Cnem127975-RA:cds_dup425
ctg4526	maker	CDS	78148	78258	.	+	1	Parent=Cnem127975-RA;ID=Cnem127975-RA:cds_dup421
ctg4526	maker	CDS	83845	83872	.	+	0	Parent=Cnem127975-RA;ID=Cnem127975-RA:cds_dup423
ctg4526	maker	CDS	86540	86634	.	+	2	ID=Cnem127975-RA:cds_dup424;Parent=Cnem127975-RA
ctg4526	maker	CDS	95038	95299	.	+	0	ID=Cnem127975-RA:cds_dup427;Parent=Cnem127975-RA
ctg4526	maker	CDS	98818	99140	.	+	2	ID=Cnem127975-RA:cds_dup428;Parent=Cnem127975-RA
ctg4526	maker	exon	99956	100129	.	+	.	ID=Cnem127975-RA:exon:121183;Parent=Cnem127975-RA
ctg4526	maker	exon	53344	53577	.	+	.	Parent=Cnem127975-RA;ID=Cnem127975-RA:exon:121170
ctg4526	maker	exon	86540	86634	.	+	.	ID=Cnem127975-RA:exon:121178;Parent=Cnem127975-RA
ctg4526	maker	exon	83845	83872	.	+	.	ID=Cnem127975-RA:exon:121177;Parent=Cnem127975-RA
ctg4526	maker	exon	78148	78258	.	+	.	ID=Cnem127975-RA:exon:121175;Parent=Cnem127975-RA
ctg4526	maker	exon	62229	62372	.	+	.	ID=Cnem127975-RA:exon:121171;Parent=Cnem127975-RA
ctg4526	maker	exon	95038	95299	.	+	.	ID=Cnem127975-RA:exon:121181;Parent=Cnem127975-RA
ctg4526	maker	exon	76458	76512	.	+	.	ID=Cnem127975-RA:exon:121174;Parent=Cnem127975-RA
ctg4526	maker	exon	93162	93410	.	+	.	ID=Cnem127975-RA:exon:121180;Parent=Cnem127975-RA
ctg4526	maker	exon	73919	74008	.	+	.	Parent=Cnem127975-RA;ID=Cnem127975-RA:exon:121173
ctg4526	maker	exon	98818	99140	.	+	.	Parent=Cnem127975-RA;ID=Cnem127975-RA:exon:121182
ctg4526	maker	exon	64765	64990	.	+	.	Parent=Cnem127975-RA;ID=Cnem127975-RA:exon:121172
ctg4526	maker	exon	90163	90378	.	+	.	Parent=Cnem127975-RA;ID=Cnem127975-RA:exon:121179
ctg4526	maker	exon	83696	83828	.	+	.	Parent=Cnem127975-RA;ID=Cnem127975-RA:exon:121176
ctg4526	maker	gene	108875	117535	.	-	.	Alias=snap-ctg4526-processed-gene-0.22;ID=Cnem127977;Name=Cnem127977
ctg4526	maker	mRNA	108875	117535	.	-	.	Name=Cnem127977-RA;_eAED=-0.17;Parent=Cnem127977;ID=Cnem127977-RA;_AED=0.34;Alias=snap-ctg4526-processed-gene-0.22-mRNA-1;_QI=0|0|0|0.2|1|1|5|0|272
ctg4526	maker	CDS	117408	117535	.	-	0	Parent=Cnem127977-RA;ID=Cnem127977-RA:cds
ctg4526	maker	CDS	116498	116611	.	-	0	Parent=Cnem127977-RA;ID=Cnem127977-RA:cds_dup431
ctg4526	maker	CDS	117267	117324	.	-	1	Parent=Cnem127977-RA;ID=Cnem127977-RA:cds_dup430
ctg4526	maker	CDS	108875	109350	.	-	2	Parent=Cnem127977-RA;ID=Cnem127977-RA:cds_dup433
ctg4526	maker	CDS	112785	112827	.	-	0	ID=Cnem127977-RA:cds_dup432;Parent=Cnem127977-RA
ctg4526	maker	exon	117408	117535	.	-	.	Parent=Cnem127977-RA;ID=Cnem127977-RA:exon:121189
ctg4526	maker	exon	112785	112827	.	-	.	ID=Cnem127977-RA:exon:121186;Parent=Cnem127977-RA
ctg4526	maker	exon	116498	116611	.	-	.	Parent=Cnem127977-RA;ID=Cnem127977-RA:exon:121187
ctg4526	maker	exon	108875	109350	.	-	.	Parent=Cnem127977-RA;ID=Cnem127977-RA:exon:121185
ctg4526	maker	exon	117267	117324	.	-	.	Parent=Cnem127977-RA;ID=Cnem127977-RA:exon:121188
ctg4526	maker	gene	132312	133049	.	-	.	Name=Cnem127978;ID=Cnem127978;Alias=maker-ctg4526-snap-gene-0.60
ctg4526	maker	mRNA	132312	133049	.	-	.	Parent=Cnem127978;Name=Cnem127978-RA;_eAED=0.49;_QI=0|0|0|1|0|0|3|0|189;ID=Cnem127978-RA;_AED=0.11;Alias=maker-ctg4526-snap-gene-0.60-mRNA-1
ctg4526	maker	CDS	132679	132801	.	-	0	Parent=Cnem127978-RA;ID=Cnem127978-RA:cds_dup434
ctg4526	maker	CDS	132852	133049	.	-	0	Parent=Cnem127978-RA;ID=Cnem127978-RA:cds
ctg4526	maker	CDS	132312	132560	.	-	0	ID=Cnem127978-RA:cds_dup435;Parent=Cnem127978-RA
ctg4526	maker	exon	132852	133049	.	-	.	Parent=Cnem127978-RA;ID=Cnem127978-RA:exon:121193
ctg4526	maker	exon	132679	132801	.	-	.	ID=Cnem127978-RA:exon:121192;Parent=Cnem127978-RA
ctg4526	maker	exon	132312	132560	.	-	.	Parent=Cnem127978-RA;ID=Cnem127978-RA:exon:121191
ctg21291	maker	gene	12096	31159	.	-	.	Name=Cnem162008;ID=Cnem162008;Alias=maker-ctg21291-augustus-gene-0.24
ctg21291	maker	mRNA	12096	31159	.	-	.	_QI=0|0|0|0.77|0.5|0.55|9|0|1035;_AED=0.46;Alias=maker-ctg21291-augustus-gene-0.24-mRNA-1;ID=Cnem162008-RA;Parent=Cnem162008;Name=Cnem162008-RA;_eAED=0.51
ctg21291	maker	CDS	13434	13772	.	-	1	ID=Cnem162008-RA:cds_dup453;Parent=Cnem162008-RA
ctg21291	maker	CDS	30240	31159	.	-	0	ID=Cnem162008-RA:cds;Parent=Cnem162008-RA
ctg21291	maker	CDS	26433	26554	.	-	0	Parent=Cnem162008-RA;ID=Cnem162008-RA:cds_dup449
ctg21291	maker	CDS	14987	15072	.	-	0	ID=Cnem162008-RA:cds_dup452;Parent=Cnem162008-RA
ctg21291	maker	CDS	12096	12737	.	-	0	ID=Cnem162008-RA:cds_dup455;Parent=Cnem162008-RA
ctg21291	maker	CDS	25130	25346	.	-	1	Parent=Cnem162008-RA;ID=Cnem162008-RA:cds_dup450
ctg21291	maker	CDS	21697	22053	.	-	0	Parent=Cnem162008-RA;ID=Cnem162008-RA:cds_dup451
ctg21291	maker	CDS	28795	28954	.	-	1	ID=Cnem162008-RA:cds_dup448;Parent=Cnem162008-RA
ctg21291	maker	CDS	12997	13261	.	-	1	Parent=Cnem162008-RA;ID=Cnem162008-RA:cds_dup454
ctg21291	maker	exon	14987	15072	.	-	.	Parent=Cnem162008-RA;ID=Cnem162008-RA:exon:149215
ctg21291	maker	exon	21697	22053	.	-	.	Parent=Cnem162008-RA;ID=Cnem162008-RA:exon:149216
ctg21291	maker	exon	12997	13261	.	-	.	Parent=Cnem162008-RA;ID=Cnem162008-RA:exon:149213
ctg21291	maker	exon	25130	25346	.	-	.	ID=Cnem162008-RA:exon:149217;Parent=Cnem162008-RA
ctg21291	maker	exon	12096	12737	.	-	.	ID=Cnem162008-RA:exon:149212;Parent=Cnem162008-RA
ctg21291	maker	exon	13434	13772	.	-	.	Parent=Cnem162008-RA;ID=Cnem162008-RA:exon:149214
ctg21291	maker	exon	26433	26554	.	-	.	ID=Cnem162008-RA:exon:149218;Parent=Cnem162008-RA
ctg21291	maker	exon	28795	28954	.	-	.	ID=Cnem162008-RA:exon:149219;Parent=Cnem162008-RA
ctg21291	maker	exon	30240	31159	.	-	.	ID=Cnem162008-RA:exon:149220;Parent=Cnem162008-RA
ctg20604	maker	gene	7490	24678	.	-	.	ID=Cnem161485;Alias=snap-ctg20604-processed-gene-0.7;Name=Cnem161485
ctg20604	maker	mRNA	7490	24678	.	-	.	Parent=Cnem161485;Name=Cnem161485-RA;_eAED=0.59;_QI=0|0|0|0.28|1|1|7|0|801;_AED=0.45;Alias=snap-ctg20604-processed-gene-0.7-mRNA-1;ID=Cnem161485-RA
ctg20604	maker	exon	21680	21861	.	-	.	ID=Cnem161485-RA:exon:125642;Parent=Cnem161485-RA
ctg20604	maker	exon	7490	7850	.	-	.	Parent=Cnem161485-RA;ID=Cnem161485-RA:exon:125639
ctg20604	maker	exon	24495	24678	.	-	.	Parent=Cnem161485-RA;ID=Cnem161485-RA:exon:125645
ctg20604	maker	exon	15543	15612	.	-	.	ID=Cnem161485-RA:exon:125641;Parent=Cnem161485-RA
ctg20604	maker	exon	23467	23596	.	-	.	Parent=Cnem161485-RA;ID=Cnem161485-RA:exon:125643
ctg20604	maker	exon	13434	14799	.	-	.	Parent=Cnem161485-RA;ID=Cnem161485-RA:exon:125640
ctg20604	maker	exon	23928	24040	.	-	.	ID=Cnem161485-RA:exon:125644;Parent=Cnem161485-RA
ctg20604	maker	CDS	24495	24678	.	-	0	Parent=Cnem161485-RA;ID=Cnem161485-RA:cds
ctg20604	maker	CDS	7490	7850	.	-	1	Parent=Cnem161485-RA;ID=Cnem161485-RA:cds_dup468
ctg20604	maker	CDS	23928	24040	.	-	2	ID=Cnem161485-RA:cds_dup463;Parent=Cnem161485-RA
ctg20604	maker	CDS	15543	15612	.	-	0	Parent=Cnem161485-RA;ID=Cnem161485-RA:cds_dup466
ctg20604	maker	CDS	23467	23596	.	-	0	ID=Cnem161485-RA:cds_dup464;Parent=Cnem161485-RA
ctg20604	maker	CDS	21680	21861	.	-	2	Parent=Cnem161485-RA;ID=Cnem161485-RA:cds_dup465
ctg20604	maker	CDS	13434	14799	.	-	2	Parent=Cnem161485-RA;ID=Cnem161485-RA:cds_dup467
ctg38070	maker	gene	13634	14963	.	-	.	Name=Cnem170449;Alias=snap-ctg38070-processed-gene-0.2;ID=Cnem170449
ctg38070	maker	mRNA	13634	14963	.	-	.	_QI=16|-1|0|1|-1|1|1|0|438;_AED=0.05;Alias=snap-ctg38070-processed-gene-0.2-mRNA-1;ID=Cnem170449-RA;Parent=Cnem170449;_eAED=-0.04;Name=Cnem170449-RA
ctg38070	maker	exon	13634	14963	.	-	.	Parent=Cnem170449-RA;ID=Cnem170449-RA:exon:477221
ctg38070	maker	CDS	13634	14947	.	-	0	ID=Cnem170449-RA:cds;Parent=Cnem170449-RA
ctg37191	maker	gene	14338	15180	.	-	.	Alias=maker-ctg37191-snap-gene-0.10;ID=Cnem170179;Name=Cnem170179
ctg37191	maker	mRNA	14338	15180	.	-	.	_eAED=-0.10;Name=Cnem170179-RA;Parent=Cnem170179;_AED=0.39;ID=Cnem170179-RA;Alias=maker-ctg37191-snap-gene-0.10-mRNA-1;_QI=0|0|0|1|1|1|2|0|227
ctg37191	maker	CDS	14338	14625	.	-	0	ID=Cnem170179-RA:cds_dup472;Parent=Cnem170179-RA
ctg37191	maker	CDS	14785	15180	.	-	0	Parent=Cnem170179-RA;ID=Cnem170179-RA:cds
ctg37191	maker	exon	14338	14625	.	-	.	ID=Cnem170179-RA:exon:82572;Parent=Cnem170179-RA
ctg37191	maker	exon	14785	15180	.	-	.	ID=Cnem170179-RA:exon:82573;Parent=Cnem170179-RA
ctg25638	maker	gene	18480	24474	.	-	.	Alias=snap-ctg25638-processed-gene-0.3;ID=Cnem165328;Name=Cnem165328
ctg25638	maker	mRNA	18480	24474	.	-	.	Parent=Cnem165328;Name=Cnem165328-RA;_eAED=0.18;_QI=0|0|0|0.33|1|1|3|0|274;ID=Cnem165328-RA;_AED=0.44;Alias=snap-ctg25638-processed-gene-0.3-mRNA-1
ctg25638	maker	CDS	18480	18701	.	-	0	ID=Cnem165328-RA:cds_dup486;Parent=Cnem165328-RA
ctg25638	maker	CDS	22384	22721	.	-	2	ID=Cnem165328-RA:cds_dup485;Parent=Cnem165328-RA
ctg25638	maker	CDS	24210	24474	.	-	0	ID=Cnem165328-RA:cds;Parent=Cnem165328-RA
ctg25638	maker	exon	18480	18701	.	-	.	Parent=Cnem165328-RA;ID=Cnem165328-RA:exon:37928
ctg25638	maker	exon	22384	22721	.	-	.	Parent=Cnem165328-RA;ID=Cnem165328-RA:exon:37929
ctg25638	maker	exon	24210	24474	.	-	.	Parent=Cnem165328-RA;ID=Cnem165328-RA:exon:37930
ctg12423	maker	gene	155887	158175	.	-	.	ID=Cnem123503;Alias=augustus-ctg12423-processed-gene-0.29;Name=Cnem123503
ctg12423	maker	mRNA	155887	158175	.	-	.	ID=Cnem123503-RA;_AED=0.36;Alias=augustus-ctg12423-processed-gene-0.29-mRNA-1;_QI=0|-1|0|1|-1|1|1|0|762;Name=Cnem123503-RA;_eAED=0.63;Parent=Cnem123503
ctg12423	maker	CDS	155887	158175	.	-	0	Parent=Cnem123503-RA;ID=Cnem123503-RA:cds
ctg12423	maker	exon	155887	158175	.	-	.	Parent=Cnem123503-RA;ID=Cnem123503-RA:exon:198883
ctg1821	maker	gene	134727	144801	.	+	.	Name=Cnem120854;Alias=maker-ctg1821-snap-gene-0.4;ID=Cnem120854
ctg1821	maker	mRNA	134727	144801	.	+	.	Alias=maker-ctg1821-snap-gene-0.4-mRNA-1;_AED=0.12;ID=Cnem120854-RA;_QI=0|0.75|0.4|0.8|0.5|0.6|5|0|175;Name=Cnem120854-RA;_eAED=0.12;Parent=Cnem120854
ctg1821	maker	CDS	144695	144801	.	+	2	Parent=Cnem120854-RA;ID=Cnem120854-RA:cds_dup498
ctg1821	maker	CDS	134789	134934	.	+	0	Parent=Cnem120854-RA;ID=Cnem120854-RA:cds_dup495
ctg1821	maker	CDS	139074	139204	.	+	1	Parent=Cnem120854-RA;ID=Cnem120854-RA:cds_dup496
ctg1821	maker	CDS	134727	134741	.	+	0	Parent=Cnem120854-RA;ID=Cnem120854-RA:cds
ctg1821	maker	CDS	142221	142349	.	+	2	ID=Cnem120854-RA:cds_dup497;Parent=Cnem120854-RA
ctg1821	maker	exon	139074	139204	.	+	.	Parent=Cnem120854-RA;ID=Cnem120854-RA:exon:379347
ctg1821	maker	exon	142221	142349	.	+	.	Parent=Cnem120854-RA;ID=Cnem120854-RA:exon:379348
ctg1821	maker	exon	134789	134934	.	+	.	Parent=Cnem120854-RA;ID=Cnem120854-RA:exon:379346
ctg1821	maker	exon	134727	134741	.	+	.	ID=Cnem120854-RA:exon:379345;Parent=Cnem120854-RA
ctg1821	maker	exon	144695	144801	.	+	.	ID=Cnem120854-RA:exon:379349;Parent=Cnem120854-RA
ctg1821	maker	gene	176448	178681	.	+	.	Name=Cnem120855;ID=Cnem120855;Alias=augustus-ctg1821-processed-gene-0.11
ctg1821	maker	mRNA	176448	178681	.	+	.	Name=Cnem120855-RA;_eAED=0.47;Parent=Cnem120855;Alias=augustus-ctg1821-processed-gene-0.11-mRNA-1;_AED=0.47;ID=Cnem120855-RA;_QI=0|0|0|0.5|1|1|2|0|136
ctg1821	maker	CDS	178287	178681	.	+	2	Parent=Cnem120855-RA;ID=Cnem120855-RA:cds_dup502
ctg1821	maker	CDS	176448	176463	.	+	0	ID=Cnem120855-RA:cds;Parent=Cnem120855-RA
ctg1821	maker	exon	178287	178681	.	+	.	ID=Cnem120855-RA:exon:379356;Parent=Cnem120855-RA
ctg1821	maker	exon	176448	176463	.	+	.	ID=Cnem120855-RA:exon:379355;Parent=Cnem120855-RA
ctg20113	maker	gene	40297	42490	.	-	.	Name=Cnem149864;Alias=maker-ctg20113-snap-gene-0.2;ID=Cnem149864
ctg20113	maker	mRNA	40297	42490	.	-	.	Parent=Cnem149864;_eAED=0.27;Name=Cnem149864-RA;_QI=0|0|0|0.75|0|0|4|0|167;_AED=0.27;Alias=maker-ctg20113-snap-gene-0.2-mRNA-1;ID=Cnem149864-RA
ctg20113	maker	CDS	41372	41515	.	-	0	ID=Cnem149864-RA:cds_dup507;Parent=Cnem149864-RA
ctg20113	maker	CDS	40804	40883	.	-	0	Parent=Cnem149864-RA;ID=Cnem149864-RA:cds_dup508
ctg20113	maker	CDS	42356	42490	.	-	0	Parent=Cnem149864-RA;ID=Cnem149864-RA:cds
ctg20113	maker	CDS	40297	40441	.	-	1	ID=Cnem149864-RA:cds_dup509;Parent=Cnem149864-RA
ctg20113	maker	exon	42356	42490	.	-	.	Parent=Cnem149864-RA;ID=Cnem149864-RA:exon:163533
ctg20113	maker	exon	41372	41515	.	-	.	Parent=Cnem149864-RA;ID=Cnem149864-RA:exon:163532
ctg20113	maker	exon	40804	40883	.	-	.	ID=Cnem149864-RA:exon:163531;Parent=Cnem149864-RA
ctg20113	maker	exon	40297	40441	.	-	.	ID=Cnem149864-RA:exon:163530;Parent=Cnem149864-RA
ctg48277	maker	gene	2130	3273	.	-	.	ID=Cnem172813;Alias=maker-ctg48277-snap-gene-0.6;Name=Cnem172813
ctg48277	maker	mRNA	2130	3273	.	-	.	Name=Cnem172813-RA;_eAED=0.80;Parent=Cnem172813;ID=Cnem172813-RA;_AED=0.32;Alias=maker-ctg48277-snap-gene-0.6-mRNA-1;_QI=82|0|0|1|0|0|2|0|323
ctg48277	maker	CDS	2130	2926	.	-	2	Parent=Cnem172813-RA;ID=Cnem172813-RA:cds_dup510
ctg48277	maker	CDS	3020	3191	.	-	0	ID=Cnem172813-RA:cds;Parent=Cnem172813-RA
ctg48277	maker	exon	3020	3273	.	-	.	Parent=Cnem172813-RA;ID=Cnem172813-RA:exon:528813
ctg48277	maker	exon	2130	2926	.	-	.	ID=Cnem172813-RA:exon:528812;Parent=Cnem172813-RA
tig00035054	maker	gene	573340	577998	.	+	.	Alias=maker-tig00035054-snap-gene-0.255;ID=Cnem042434;Name=Cnem042434
tig00035054	maker	mRNA	573340	577998	.	+	.	Parent=Cnem042434;Name=Cnem042434-RA;_eAED=0.31;_QI=100|0.5|0.66|0.66|0|0|3|0|257;Alias=maker-tig00035054-snap-gene-0.255-mRNA-1;_AED=0.31;ID=Cnem042434-RA
tig00035054	maker	exon	573340	573528	.	+	.	Parent=Cnem042434-RA;ID=Cnem042434-RA:exon:488468
tig00035054	maker	exon	576027	576168	.	+	.	ID=Cnem042434-RA:exon:488469;Parent=Cnem042434-RA
tig00035054	maker	exon	577456	577998	.	+	.	Parent=Cnem042434-RA;ID=Cnem042434-RA:exon:488470
tig00035054	maker	CDS	577456	577998	.	+	0	Parent=Cnem042434-RA;ID=Cnem042434-RA:cds_dup514
tig00035054	maker	CDS	573440	573528	.	+	0	Parent=Cnem042434-RA;ID=Cnem042434-RA:cds
tig00035054	maker	CDS	576027	576168	.	+	1	Parent=Cnem042434-RA;ID=Cnem042434-RA:cds_dup513
tig00035054	maker	gene	443003	453913	.	+	.	Alias=maker-tig00035054-augustus-gene-0.232;ID=Cnem042417;Name=Cnem042417
tig00035054	maker	mRNA	443003	453913	.	+	.	_AED=0.33;Alias=maker-tig00035054-augustus-gene-0.232-mRNA-1;ID=Cnem042417-RA;_QI=0|0|0|0.37|0.71|0.62|8|0|831;_eAED=0.33;Name=Cnem042417-RA;Parent=Cnem042417
tig00035054	maker	exon	450738	450943	.	+	.	ID=Cnem042417-RA:exon:488476;Parent=Cnem042417-RA
tig00035054	maker	exon	443003	443107	.	+	.	Parent=Cnem042417-RA;ID=Cnem042417-RA:exon:488472
tig00035054	maker	exon	453737	453913	.	+	.	ID=Cnem042417-RA:exon:488479;Parent=Cnem042417-RA
tig00035054	maker	exon	452090	453167	.	+	.	ID=Cnem042417-RA:exon:488477;Parent=Cnem042417-RA
tig00035054	maker	exon	447995	448103	.	+	.	ID=Cnem042417-RA:exon:488474;Parent=Cnem042417-RA
tig00035054	maker	exon	449563	449983	.	+	.	ID=Cnem042417-RA:exon:488475;Parent=Cnem042417-RA
tig00035054	maker	exon	453428	453654	.	+	.	Parent=Cnem042417-RA;ID=Cnem042417-RA:exon:488478
tig00035054	maker	exon	446793	446965	.	+	.	ID=Cnem042417-RA:exon:488473;Parent=Cnem042417-RA
tig00035054	maker	CDS	450738	450943	.	+	2	ID=Cnem042417-RA:cds_dup518;Parent=Cnem042417-RA
tig00035054	maker	CDS	452090	453167	.	+	0	ID=Cnem042417-RA:cds_dup519;Parent=Cnem042417-RA
tig00035054	maker	CDS	446793	446965	.	+	0	Parent=Cnem042417-RA;ID=Cnem042417-RA:cds_dup515
tig00035054	maker	CDS	453428	453654	.	+	2	Parent=Cnem042417-RA;ID=Cnem042417-RA:cds_dup520
tig00035054	maker	CDS	447995	448103	.	+	1	ID=Cnem042417-RA:cds_dup516;Parent=Cnem042417-RA
tig00035054	maker	CDS	453737	453913	.	+	0	Parent=Cnem042417-RA;ID=Cnem042417-RA:cds_dup521
tig00035054	maker	CDS	449563	449983	.	+	0	ID=Cnem042417-RA:cds_dup517;Parent=Cnem042417-RA
tig00035054	maker	CDS	443003	443107	.	+	0	Parent=Cnem042417-RA;ID=Cnem042417-RA:cds
tig00035054	maker	gene	249458	259840	.	+	.	Alias=maker-tig00035054-snap-gene-0.245;ID=Cnem042404;Name=Cnem042404
tig00035054	maker	mRNA	249458	259840	.	+	.	Parent=Cnem042404;_eAED=0.38;Name=Cnem042404-RA;_QI=0|0|0|0.62|0.14|0.25|8|0|980;_AED=0.12;ID=Cnem042404-RA;Alias=maker-tig00035054-snap-gene-0.245-mRNA-1
tig00035054	maker	CDS	256904	257265	.	+	2	ID=Cnem042404-RA:cds_dup525;Parent=Cnem042404-RA
tig00035054	maker	CDS	259529	259692	.	+	1	Parent=Cnem042404-RA;ID=Cnem042404-RA:cds_dup528
tig00035054	maker	CDS	258782	259315	.	+	1	Parent=Cnem042404-RA;ID=Cnem042404-RA:cds_dup527
tig00035054	maker	CDS	249971	250119	.	+	1	ID=Cnem042404-RA:cds_dup523;Parent=Cnem042404-RA
tig00035054	maker	CDS	250315	250473	.	+	2	ID=Cnem042404-RA:cds_dup524;Parent=Cnem042404-RA
tig00035054	maker	CDS	249458	249531	.	+	0	Parent=Cnem042404-RA;ID=Cnem042404-RA:cds
tig00035054	maker	CDS	259719	259840	.	+	2	Parent=Cnem042404-RA;ID=Cnem042404-RA:cds_dup529
tig00035054	maker	CDS	257270	258648	.	+	0	ID=Cnem042404-RA:cds_dup526;Parent=Cnem042404-RA
tig00035054	maker	exon	258782	259315	.	+	.	ID=Cnem042404-RA:exon:488487;Parent=Cnem042404-RA
tig00035054	maker	exon	259529	259692	.	+	.	ID=Cnem042404-RA:exon:488488;Parent=Cnem042404-RA
tig00035054	maker	exon	249458	249531	.	+	.	Parent=Cnem042404-RA;ID=Cnem042404-RA:exon:488482
tig00035054	maker	exon	249971	250119	.	+	.	ID=Cnem042404-RA:exon:488483;Parent=Cnem042404-RA
tig00035054	maker	exon	259719	259840	.	+	.	Parent=Cnem042404-RA;ID=Cnem042404-RA:exon:488489
tig00035054	maker	exon	256904	257265	.	+	.	ID=Cnem042404-RA:exon:488485;Parent=Cnem042404-RA
tig00035054	maker	exon	257270	258648	.	+	.	Parent=Cnem042404-RA;ID=Cnem042404-RA:exon:488486
tig00035054	maker	exon	250315	250473	.	+	.	ID=Cnem042404-RA:exon:488484;Parent=Cnem042404-RA
tig00035054	maker	gene	176292	179031	.	-	.	Name=Cnem042400;Alias=maker-tig00035054-snap-gene-0.258;ID=Cnem042400
tig00035054	maker	mRNA	176292	179031	.	-	.	_eAED=0.09;Name=Cnem042400-RA;Parent=Cnem042400;Alias=maker-tig00035054-snap-gene-0.258-mRNA-1;_AED=0.45;ID=Cnem042400-RA;_QI=0|0|0|0.66|0|0.33|3|0|637
tig00035054	maker	exon	177262	177632	.	-	.	Parent=Cnem042400-RA;ID=Cnem042400-RA:exon:488502
tig00035054	maker	exon	176292	176443	.	-	.	ID=Cnem042400-RA:exon:488501;Parent=Cnem042400-RA
tig00035054	maker	exon	177641	179031	.	-	.	Parent=Cnem042400-RA;ID=Cnem042400-RA:exon:488503
tig00035054	maker	CDS	176292	176443	.	-	2	ID=Cnem042400-RA:cds_dup534;Parent=Cnem042400-RA
tig00035054	maker	CDS	177641	179031	.	-	0	ID=Cnem042400-RA:cds;Parent=Cnem042400-RA
tig00035054	maker	CDS	177262	177632	.	-	1	Parent=Cnem042400-RA;ID=Cnem042400-RA:cds_dup533
tig00035054	maker	gene	561053	562254	.	-	.	Alias=maker-tig00035054-snap-gene-0.278;ID=Cnem042432;Name=Cnem042432
tig00035054	maker	mRNA	561053	562254	.	-	.	_QI=0|0|0|1|1|1|2|0|394;_AED=0.30;ID=Cnem042432-RA;Alias=maker-tig00035054-snap-gene-0.278-mRNA-1;Parent=Cnem042432;Name=Cnem042432-RA;_eAED=0.32
tig00035054	maker	CDS	561498	562254	.	-	0	Parent=Cnem042432-RA;ID=Cnem042432-RA:cds
tig00035054	maker	CDS	561053	561480	.	-	2	ID=Cnem042432-RA:cds_dup541;Parent=Cnem042432-RA
tig00035054	maker	exon	561053	561480	.	-	.	ID=Cnem042432-RA:exon:488524;Parent=Cnem042432-RA
tig00035054	maker	exon	561498	562254	.	-	.	ID=Cnem042432-RA:exon:488525;Parent=Cnem042432-RA
ctg2119	maker	gene	55608	61309	.	+	.	Alias=maker-ctg2119-snap-gene-0.0;ID=Cnem121827;Name=Cnem121827
ctg2119	maker	mRNA	55608	61309	.	+	.	Name=Cnem121827-RA;_eAED=0.14;Parent=Cnem121827;_AED=0.14;Alias=maker-ctg2119-snap-gene-0.0-mRNA-1;ID=Cnem121827-RA;_QI=0|1|0.66|1|0.5|0|3|0|181
ctg2119	maker	exon	55608	55832	.	+	.	ID=Cnem121827-RA:exon:622433;Parent=Cnem121827-RA
ctg2119	maker	exon	57546	57816	.	+	.	ID=Cnem121827-RA:exon:622434;Parent=Cnem121827-RA
ctg2119	maker	exon	61263	61309	.	+	.	Parent=Cnem121827-RA;ID=Cnem121827-RA:exon:622435
ctg2119	maker	CDS	61263	61309	.	+	2	Parent=Cnem121827-RA;ID=Cnem121827-RA:cds_dup564
ctg2119	maker	CDS	55608	55832	.	+	0	ID=Cnem121827-RA:cds;Parent=Cnem121827-RA
ctg2119	maker	CDS	57546	57816	.	+	0	Parent=Cnem121827-RA;ID=Cnem121827-RA:cds_dup563
ctg2119	maker	gene	87752	95280	.	+	.	ID=Cnem121829;Alias=snap-ctg2119-processed-gene-0.30;Name=Cnem121829
ctg2119	maker	mRNA	87752	95280	.	+	.	Parent=Cnem121829;_eAED=0.18;Name=Cnem121829-RA;_QI=0|0|0|0.75|1|1|4|0|680;ID=Cnem121829-RA;_AED=0.18;Alias=snap-ctg2119-processed-gene-0.30-mRNA-1
ctg2119	maker	exon	87752	89218	.	+	.	Parent=Cnem121829-RA;ID=Cnem121829-RA:exon:622436
ctg2119	maker	exon	91152	91364	.	+	.	ID=Cnem121829-RA:exon:622437;Parent=Cnem121829-RA
ctg2119	maker	exon	94887	95071	.	+	.	ID=Cnem121829-RA:exon:622438;Parent=Cnem121829-RA
ctg2119	maker	exon	95103	95280	.	+	.	ID=Cnem121829-RA:exon:622439;Parent=Cnem121829-RA
ctg2119	maker	CDS	91152	91364	.	+	0	Parent=Cnem121829-RA;ID=Cnem121829-RA:cds_dup565
ctg2119	maker	CDS	87752	89218	.	+	0	Parent=Cnem121829-RA;ID=Cnem121829-RA:cds
ctg2119	maker	CDS	95103	95280	.	+	1	ID=Cnem121829-RA:cds_dup567;Parent=Cnem121829-RA
ctg2119	maker	CDS	94887	95071	.	+	0	Parent=Cnem121829-RA;ID=Cnem121829-RA:cds_dup566
ctg2119	maker	gene	111452	143539	.	+	.	ID=Cnem121832;Alias=maker-ctg2119-snap-gene-0.2;Name=Cnem121832
ctg2119	maker	mRNA	111452	143539	.	+	.	_QI=0|0|0|0.22|1|1|9|0|1814;_AED=0.15;ID=Cnem121832-RA;Alias=maker-ctg2119-snap-gene-0.2-mRNA-1;Parent=Cnem121832;Name=Cnem121832-RA;_eAED=0.23
ctg2119	maker	exon	139222	139776	.	+	.	ID=Cnem121832-RA:exon:622447;Parent=Cnem121832-RA
ctg2119	maker	exon	127958	127994	.	+	.	Parent=Cnem121832-RA;ID=Cnem121832-RA:exon:622444
ctg2119	maker	exon	134648	134816	.	+	.	ID=Cnem121832-RA:exon:622445;Parent=Cnem121832-RA
ctg2119	maker	exon	111452	111460	.	+	.	Parent=Cnem121832-RA;ID=Cnem121832-RA:exon:622440
ctg2119	maker	exon	118305	118522	.	+	.	Parent=Cnem121832-RA;ID=Cnem121832-RA:exon:622443
ctg2119	maker	exon	139782	143539	.	+	.	Parent=Cnem121832-RA;ID=Cnem121832-RA:exon:622448
ctg2119	maker	exon	112685	113137	.	+	.	Parent=Cnem121832-RA;ID=Cnem121832-RA:exon:622441
ctg2119	maker	exon	135576	135685	.	+	.	ID=Cnem121832-RA:exon:622446;Parent=Cnem121832-RA
ctg2119	maker	exon	113149	113284	.	+	.	Parent=Cnem121832-RA;ID=Cnem121832-RA:exon:622442
ctg2119	maker	CDS	139782	143539	.	+	2	Parent=Cnem121832-RA;ID=Cnem121832-RA:cds_dup575
ctg2119	maker	CDS	111452	111460	.	+	0	Parent=Cnem121832-RA;ID=Cnem121832-RA:cds
ctg2119	maker	CDS	134648	134816	.	+	2	Parent=Cnem121832-RA;ID=Cnem121832-RA:cds_dup572
ctg2119	maker	CDS	139222	139776	.	+	2	Parent=Cnem121832-RA;ID=Cnem121832-RA:cds_dup574
ctg2119	maker	CDS	113149	113284	.	+	0	Parent=Cnem121832-RA;ID=Cnem121832-RA:cds_dup569
ctg2119	maker	CDS	127958	127994	.	+	0	ID=Cnem121832-RA:cds_dup571;Parent=Cnem121832-RA
ctg2119	maker	CDS	118305	118522	.	+	2	Parent=Cnem121832-RA;ID=Cnem121832-RA:cds_dup570
ctg2119	maker	CDS	112685	113137	.	+	0	ID=Cnem121832-RA:cds_dup568;Parent=Cnem121832-RA
ctg2119	maker	CDS	135576	135685	.	+	1	Parent=Cnem121832-RA;ID=Cnem121832-RA:cds_dup573
ctg2119	maker	gene	139778	170124	.	-	.	Name=Cnem121833;ID=Cnem121833;Alias=maker-ctg2119-augustus-gene-0.53
ctg2119	maker	mRNA	139778	170124	.	-	.	ID=Cnem121833-RA;_AED=0.28;Alias=maker-ctg2119-augustus-gene-0.53-mRNA-1;_QI=0|0.42|0.4|0.86|0.71|0.8|15|0|1570;_eAED=0.39;Name=Cnem121833-RA;Parent=Cnem121833
ctg2119	maker	CDS	161129	161221	.	-	0	ID=Cnem121833-RA:cds_dup583;Parent=Cnem121833-RA
ctg2119	maker	CDS	167743	167883	.	-	0	Parent=Cnem121833-RA;ID=Cnem121833-RA:cds_dup580
ctg2119	maker	CDS	170073	170124	.	-	0	ID=Cnem121833-RA:cds;Parent=Cnem121833-RA
ctg2119	maker	CDS	167053	167166	.	-	0	Parent=Cnem121833-RA;ID=Cnem121833-RA:cds_dup581
ctg2119	maker	CDS	141604	143533	.	-	0	ID=Cnem121833-RA:cds_dup589;Parent=Cnem121833-RA
ctg2119	maker	CDS	148776	148968	.	-	2	Parent=Cnem121833-RA;ID=Cnem121833-RA:cds_dup586
ctg2119	maker	CDS	169803	169894	.	-	2	Parent=Cnem121833-RA;ID=Cnem121833-RA:cds_dup579
ctg2119	maker	CDS	158148	158229	.	-	0	Parent=Cnem121833-RA;ID=Cnem121833-RA:cds_dup584
ctg2119	maker	CDS	141036	141530	.	-	2	ID=Cnem121833-RA:cds_dup590;Parent=Cnem121833-RA
ctg2119	maker	CDS	140396	140962	.	-	2	Parent=Cnem121833-RA;ID=Cnem121833-RA:cds_dup591
ctg2119	maker	CDS	139778	140322	.	-	2	ID=Cnem121833-RA:cds_dup592;Parent=Cnem121833-RA
ctg2119	maker	CDS	143938	143968	.	-	1	ID=Cnem121833-RA:cds_dup588;Parent=Cnem121833-RA
ctg2119	maker	CDS	144114	144188	.	-	1	ID=Cnem121833-RA:cds_dup587;Parent=Cnem121833-RA
ctg2119	maker	CDS	152941	153111	.	-	2	ID=Cnem121833-RA:cds_dup585;Parent=Cnem121833-RA
ctg2119	maker	CDS	165047	165178	.	-	0	ID=Cnem121833-RA:cds_dup582;Parent=Cnem121833-RA
ctg2119	maker	exon	139778	140322	.	-	.	Parent=Cnem121833-RA;ID=Cnem121833-RA:exon:622466
ctg2119	maker	exon	167053	167166	.	-	.	ID=Cnem121833-RA:exon:622477;Parent=Cnem121833-RA
ctg2119	maker	exon	143938	143968	.	-	.	Parent=Cnem121833-RA;ID=Cnem121833-RA:exon:622470
ctg2119	maker	exon	152941	153111	.	-	.	ID=Cnem121833-RA:exon:622473;Parent=Cnem121833-RA
ctg2119	maker	exon	141036	141530	.	-	.	Parent=Cnem121833-RA;ID=Cnem121833-RA:exon:622468
ctg2119	maker	exon	158148	158229	.	-	.	ID=Cnem121833-RA:exon:622474;Parent=Cnem121833-RA
ctg2119	maker	exon	165047	165178	.	-	.	Parent=Cnem121833-RA;ID=Cnem121833-RA:exon:622476
ctg2119	maker	exon	148776	148968	.	-	.	Parent=Cnem121833-RA;ID=Cnem121833-RA:exon:622472
ctg2119	maker	exon	141604	143533	.	-	.	Parent=Cnem121833-RA;ID=Cnem121833-RA:exon:622469
ctg2119	maker	exon	140396	140962	.	-	.	ID=Cnem121833-RA:exon:622467;Parent=Cnem121833-RA
ctg2119	maker	exon	167743	167883	.	-	.	ID=Cnem121833-RA:exon:622478;Parent=Cnem121833-RA
ctg2119	maker	exon	170073	170124	.	-	.	ID=Cnem121833-RA:exon:622480;Parent=Cnem121833-RA
ctg2119	maker	exon	169803	169894	.	-	.	ID=Cnem121833-RA:exon:622479;Parent=Cnem121833-RA
ctg2119	maker	exon	161129	161221	.	-	.	Parent=Cnem121833-RA;ID=Cnem121833-RA:exon:622475
ctg2119	maker	exon	144114	144188	.	-	.	ID=Cnem121833-RA:exon:622471;Parent=Cnem121833-RA
ctg17621	maker	gene	28091	34012	.	-	.	Alias=augustus-ctg17621-processed-gene-0.14;ID=Cnem143025;Name=Cnem143025
ctg17621	maker	mRNA	28091	34012	.	-	.	Parent=Cnem143025;Name=Cnem143025-RA;_eAED=0.14;_QI=0|0|0|0.66|1|1|3|0|1275;Alias=augustus-ctg17621-processed-gene-0.14-mRNA-1;_AED=0.37;ID=Cnem143025-RA
ctg17621	maker	exon	28091	30185	.	-	.	Parent=Cnem143025-RA;ID=Cnem143025-RA:exon:174944
ctg17621	maker	exon	31075	31099	.	-	.	Parent=Cnem143025-RA;ID=Cnem143025-RA:exon:174945
ctg17621	maker	exon	32305	34012	.	-	.	Parent=Cnem143025-RA;ID=Cnem143025-RA:exon:174946
ctg17621	maker	CDS	32305	34012	.	-	0	ID=Cnem143025-RA:cds;Parent=Cnem143025-RA
ctg17621	maker	CDS	28091	30185	.	-	1	ID=Cnem143025-RA:cds_dup600;Parent=Cnem143025-RA
ctg17621	maker	CDS	31075	31099	.	-	2	Parent=Cnem143025-RA;ID=Cnem143025-RA:cds_dup599
ctg17621	maker	gene	7384	8409	.	+	.	ID=Cnem143023;Alias=maker-ctg17621-snap-gene-0.50;Name=Cnem143023
ctg17621	maker	mRNA	7384	8409	.	+	.	_QI=0|0|0|1|0|0|3|0|295;_AED=0.06;Alias=maker-ctg17621-snap-gene-0.50-mRNA-1;ID=Cnem143023-RA;Parent=Cnem143023;Name=Cnem143023-RA;_eAED=0.34
ctg17621	maker	CDS	7620	7938	.	+	0	ID=Cnem143023-RA:cds_dup603;Parent=Cnem143023-RA
ctg17621	maker	CDS	8063	8409	.	+	2	ID=Cnem143023-RA:cds_dup604;Parent=Cnem143023-RA
ctg17621	maker	CDS	7384	7605	.	+	0	Parent=Cnem143023-RA;ID=Cnem143023-RA:cds
ctg17621	maker	exon	8063	8409	.	+	.	ID=Cnem143023-RA:exon:174954;Parent=Cnem143023-RA
ctg17621	maker	exon	7384	7605	.	+	.	ID=Cnem143023-RA:exon:174952;Parent=Cnem143023-RA
ctg17621	maker	exon	7620	7938	.	+	.	ID=Cnem143023-RA:exon:174953;Parent=Cnem143023-RA
ctg13674	maker	gene	20895	24348	.	+	.	Alias=maker-ctg13674-augustus-gene-0.0;ID=Cnem102820;Name=Cnem102820
ctg13674	maker	mRNA	20895	24348	.	+	.	_eAED=0.00;Name=Cnem102820-RA;Parent=Cnem102820;_AED=0.00;ID=Cnem102820-RA;Alias=maker-ctg13674-augustus-gene-0.0-mRNA-1;_QI=0|1|0.5|1|0|0.5|2|993|111
ctg13674	maker	CDS	20895	21201	.	+	0	Parent=Cnem102820-RA;ID=Cnem102820-RA:cds
ctg13674	maker	CDS	23327	23355	.	+	2	ID=Cnem102820-RA:cds_dup608;Parent=Cnem102820-RA
ctg13674	maker	exon	20895	21201	.	+	.	Parent=Cnem102820-RA;ID=Cnem102820-RA:exon:660028
ctg13674	maker	exon	23327	24348	.	+	.	ID=Cnem102820-RA:exon:660029;Parent=Cnem102820-RA
ctg13674	maker	gene	264885	265957	.	-	.	Name=Cnem102826;ID=Cnem102826;Alias=snap-ctg13674-processed-gene-0.101
ctg13674	maker	mRNA	264885	265957	.	-	.	_eAED=0.49;Name=Cnem102826-RA;Parent=Cnem102826;_AED=0.42;Alias=snap-ctg13674-processed-gene-0.101-mRNA-1;ID=Cnem102826-RA;_QI=0|0|0|0.66|1|1|3|0|258
ctg13674	maker	CDS	264885	265256	.	-	0	Parent=Cnem102826-RA;ID=Cnem102826-RA:cds_dup611
ctg13674	maker	CDS	265786	265957	.	-	0	ID=Cnem102826-RA:cds;Parent=Cnem102826-RA
ctg13674	maker	CDS	265396	265628	.	-	2	Parent=Cnem102826-RA;ID=Cnem102826-RA:cds_dup610
ctg13674	maker	exon	264885	265256	.	-	.	Parent=Cnem102826-RA;ID=Cnem102826-RA:exon:660033
ctg13674	maker	exon	265396	265628	.	-	.	ID=Cnem102826-RA:exon:660034;Parent=Cnem102826-RA
ctg13674	maker	exon	265786	265957	.	-	.	ID=Cnem102826-RA:exon:660035;Parent=Cnem102826-RA
tig00034804	maker	gene	48418	61638	.	+	.	ID=Cnem076797;Alias=maker-tig00034804-augustus-gene-0.2;Name=Cnem076797
tig00034804	maker	mRNA	48418	61638	.	+	.	_QI=0|0|0|1|1|1|8|0|339;_AED=0.43;Alias=maker-tig00034804-augustus-gene-0.2-mRNA-1;ID=Cnem076797-RA;Parent=Cnem076797;_eAED=0.72;Name=Cnem076797-RA
tig00034804	maker	exon	61004	61147	.	+	.	Parent=Cnem076797-RA;ID=Cnem076797-RA:exon:95744
tig00034804	maker	exon	48418	48537	.	+	.	ID=Cnem076797-RA:exon:95738;Parent=Cnem076797-RA
tig00034804	maker	exon	53644	53720	.	+	.	Parent=Cnem076797-RA;ID=Cnem076797-RA:exon:95740
tig00034804	maker	exon	52198	52354	.	+	.	Parent=Cnem076797-RA;ID=Cnem076797-RA:exon:95739
tig00034804	maker	exon	61451	61638	.	+	.	Parent=Cnem076797-RA;ID=Cnem076797-RA:exon:95745
tig00034804	maker	exon	54349	54453	.	+	.	ID=Cnem076797-RA:exon:95741;Parent=Cnem076797-RA
tig00034804	maker	exon	57382	57538	.	+	.	Parent=Cnem076797-RA;ID=Cnem076797-RA:exon:95743
tig00034804	maker	exon	55389	55460	.	+	.	ID=Cnem076797-RA:exon:95742;Parent=Cnem076797-RA
tig00034804	maker	CDS	54349	54453	.	+	0	ID=Cnem076797-RA:cds_dup619;Parent=Cnem076797-RA
tig00034804	maker	CDS	53644	53720	.	+	2	ID=Cnem076797-RA:cds_dup618;Parent=Cnem076797-RA
tig00034804	maker	CDS	52198	52354	.	+	0	ID=Cnem076797-RA:cds_dup617;Parent=Cnem076797-RA
tig00034804	maker	CDS	48418	48537	.	+	0	ID=Cnem076797-RA:cds;Parent=Cnem076797-RA
tig00034804	maker	CDS	61004	61147	.	+	2	Parent=Cnem076797-RA;ID=Cnem076797-RA:cds_dup622
tig00034804	maker	CDS	55389	55460	.	+	0	Parent=Cnem076797-RA;ID=Cnem076797-RA:cds_dup620
tig00034804	maker	CDS	57382	57538	.	+	0	Parent=Cnem076797-RA;ID=Cnem076797-RA:cds_dup621
tig00034804	maker	CDS	61451	61638	.	+	2	ID=Cnem076797-RA:cds_dup623;Parent=Cnem076797-RA
tig00034804	maker	gene	27819	32804	.	+	.	Alias=maker-tig00034804-snap-gene-0.132;ID=Cnem076795;Name=Cnem076795
tig00034804	maker	mRNA	27819	32804	.	+	.	_QI=0|0|0|1|0|0.25|4|0|191;_AED=0.45;Alias=maker-tig00034804-snap-gene-0.132-mRNA-1;ID=Cnem076795-RA;Parent=Cnem076795;Name=Cnem076795-RA;_eAED=1.00
tig00034804	maker	CDS	27819	27951	.	+	0	Parent=Cnem076795-RA;ID=Cnem076795-RA:cds
tig00034804	maker	CDS	30096	30308	.	+	2	Parent=Cnem076795-RA;ID=Cnem076795-RA:cds_dup624
tig00034804	maker	CDS	32122	32228	.	+	2	ID=Cnem076795-RA:cds_dup625;Parent=Cnem076795-RA
tig00034804	maker	CDS	32682	32804	.	+	0	ID=Cnem076795-RA:cds_dup626;Parent=Cnem076795-RA
tig00034804	maker	exon	32122	32228	.	+	.	ID=Cnem076795-RA:exon:95759;Parent=Cnem076795-RA
tig00034804	maker	exon	30096	30308	.	+	.	ID=Cnem076795-RA:exon:95758;Parent=Cnem076795-RA
tig00034804	maker	exon	27819	27951	.	+	.	Parent=Cnem076795-RA;ID=Cnem076795-RA:exon:95757
tig00034804	maker	exon	32682	32804	.	+	.	ID=Cnem076795-RA:exon:95760;Parent=Cnem076795-RA
tig00034804	maker	gene	292053	293497	.	+	.	Alias=maker-tig00034804-snap-gene-0.137;ID=Cnem076805;Name=Cnem076805
tig00034804	maker	mRNA	292053	293497	.	+	.	_AED=0.18;ID=Cnem076805-RA;Alias=maker-tig00034804-snap-gene-0.137-mRNA-1;_QI=76|0|0|0.8|0|0|5|0|228;_eAED=0.52;Name=Cnem076805-RA;Parent=Cnem076805
tig00034804	maker	exon	293093	293344	.	+	.	Parent=Cnem076805-RA;ID=Cnem076805-RA:exon:95781
tig00034804	maker	exon	293385	293497	.	+	.	Parent=Cnem076805-RA;ID=Cnem076805-RA:exon:95782
tig00034804	maker	exon	292187	292360	.	+	.	Parent=Cnem076805-RA;ID=Cnem076805-RA:exon:95779
tig00034804	maker	exon	292396	292528	.	+	.	Parent=Cnem076805-RA;ID=Cnem076805-RA:exon:95780
tig00034804	maker	exon	292053	292140	.	+	.	ID=Cnem076805-RA:exon:95778;Parent=Cnem076805-RA
tig00034804	maker	CDS	292129	292140	.	+	0	ID=Cnem076805-RA:cds;Parent=Cnem076805-RA
tig00034804	maker	CDS	292396	292528	.	+	0	Parent=Cnem076805-RA;ID=Cnem076805-RA:cds_dup630
tig00034804	maker	CDS	293093	293344	.	+	2	ID=Cnem076805-RA:cds_dup631;Parent=Cnem076805-RA
tig00034804	maker	CDS	293385	293497	.	+	2	ID=Cnem076805-RA:cds_dup632;Parent=Cnem076805-RA
tig00034804	maker	CDS	292187	292360	.	+	0	ID=Cnem076805-RA:cds_dup629;Parent=Cnem076805-RA
ctg7984	maker	gene	5398	19402	.	+	.	Name=Cnem143907;ID=Cnem143907;Alias=maker-ctg7984-snap-gene-0.33
ctg7984	maker	mRNA	5398	19402	.	+	.	_AED=0.14;ID=Cnem143907-RA;Alias=maker-ctg7984-snap-gene-0.33-mRNA-1;_QI=0|0|0|0.77|0.87|0.88|9|0|871;Name=Cnem143907-RA;_eAED=0.31;Parent=Cnem143907
ctg7984	maker	CDS	8275	8384	.	+	2	Parent=Cnem143907-RA;ID=Cnem143907-RA:cds_dup641
ctg7984	maker	CDS	17171	17280	.	+	1	ID=Cnem143907-RA:cds_dup645;Parent=Cnem143907-RA
ctg7984	maker	CDS	11407	11554	.	+	2	ID=Cnem143907-RA:cds_dup644;Parent=Cnem143907-RA
ctg7984	maker	CDS	9281	9531	.	+	0	Parent=Cnem143907-RA;ID=Cnem143907-RA:cds_dup642
ctg7984	maker	CDS	6974	7060	.	+	2	Parent=Cnem143907-RA;ID=Cnem143907-RA:cds_dup640
ctg7984	maker	CDS	5398	5482	.	+	0	Parent=Cnem143907-RA;ID=Cnem143907-RA:cds
ctg7984	maker	CDS	17681	17911	.	+	2	ID=Cnem143907-RA:cds_dup646;Parent=Cnem143907-RA
ctg7984	maker	CDS	10315	10421	.	+	1	Parent=Cnem143907-RA;ID=Cnem143907-RA:cds_dup643
ctg7984	maker	CDS	17916	19402	.	+	2	Parent=Cnem143907-RA;ID=Cnem143907-RA:cds_dup647
ctg7984	maker	exon	8275	8384	.	+	.	Parent=Cnem143907-RA;ID=Cnem143907-RA:exon:394220
ctg7984	maker	exon	6974	7060	.	+	.	ID=Cnem143907-RA:exon:394219;Parent=Cnem143907-RA
ctg7984	maker	exon	5398	5482	.	+	.	ID=Cnem143907-RA:exon:394218;Parent=Cnem143907-RA
ctg7984	maker	exon	10315	10421	.	+	.	ID=Cnem143907-RA:exon:394222;Parent=Cnem143907-RA
ctg7984	maker	exon	17171	17280	.	+	.	ID=Cnem143907-RA:exon:394224;Parent=Cnem143907-RA
ctg7984	maker	exon	11407	11554	.	+	.	Parent=Cnem143907-RA;ID=Cnem143907-RA:exon:394223
ctg7984	maker	exon	17916	19402	.	+	.	ID=Cnem143907-RA:exon:394226;Parent=Cnem143907-RA
ctg7984	maker	exon	9281	9531	.	+	.	Parent=Cnem143907-RA;ID=Cnem143907-RA:exon:394221
ctg7984	maker	exon	17681	17911	.	+	.	ID=Cnem143907-RA:exon:394225;Parent=Cnem143907-RA
ctg50365	maker	gene	2675	5360	.	+	.	ID=Cnem173242;Alias=maker-ctg50365-snap-gene-0.0;Name=Cnem173242
ctg50365	maker	mRNA	2675	5360	.	+	.	_eAED=1.00;Name=Cnem173242-RA;Parent=Cnem173242;Alias=maker-ctg50365-snap-gene-0.0-mRNA-1;_AED=0.41;ID=Cnem173242-RA;_QI=0|0|0|1|0.25|0|5|0|273
ctg50365	maker	exon	5179	5360	.	+	.	ID=Cnem173242-RA:exon:261411;Parent=Cnem173242-RA
ctg50365	maker	exon	3735	3916	.	+	.	ID=Cnem173242-RA:exon:261408;Parent=Cnem173242-RA
ctg50365	maker	exon	3993	4199	.	+	.	Parent=Cnem173242-RA;ID=Cnem173242-RA:exon:261409
ctg50365	maker	exon	2675	2717	.	+	.	ID=Cnem173242-RA:exon:261407;Parent=Cnem173242-RA
ctg50365	maker	exon	4917	5124	.	+	.	Parent=Cnem173242-RA;ID=Cnem173242-RA:exon:261410
ctg50365	maker	CDS	3993	4199	.	+	0	ID=Cnem173242-RA:cds_dup649;Parent=Cnem173242-RA
ctg50365	maker	CDS	2675	2717	.	+	0	ID=Cnem173242-RA:cds;Parent=Cnem173242-RA
ctg50365	maker	CDS	5179	5360	.	+	2	Parent=Cnem173242-RA;ID=Cnem173242-RA:cds_dup651
ctg50365	maker	CDS	3735	3916	.	+	2	Parent=Cnem173242-RA;ID=Cnem173242-RA:cds_dup648
ctg50365	maker	CDS	4917	5124	.	+	0	ID=Cnem173242-RA:cds_dup650;Parent=Cnem173242-RA
scaffold_36687	maker	gene	46212	67491	.	-	.	Alias=maker-scaffold_36687-augustus-gene-0.105;ID=Cnem001812;Name=Cnem001812
scaffold_36687	maker	mRNA	46212	67491	.	-	.	_AED=0.22;ID=Cnem001812-RA;Alias=maker-scaffold_36687-augustus-gene-0.105-mRNA-1;_QI=0|0.76|0.78|0.92|0.84|0.78|14|1146|1906;Name=Cnem001812-RA;_eAED=-0.05;Parent=Cnem001812
scaffold_36687	maker	exon	62496	62620	.	-	.	Parent=Cnem001812-RA;ID=Cnem001812-RA:exon:54914
scaffold_36687	maker	exon	50442	50641	.	-	.	ID=Cnem001812-RA:exon:54922;Parent=Cnem001812-RA
scaffold_36687	maker	exon	58146	58518	.	-	.	Parent=Cnem001812-RA;ID=Cnem001812-RA:exon:54916
scaffold_36687	maker	exon	53961	54037	.	-	.	ID=Cnem001812-RA:exon:54919;Parent=Cnem001812-RA
scaffold_36687	maker	exon	49070	49108	.	-	.	ID=Cnem001812-RA:exon:54924;Parent=Cnem001812-RA
scaffold_36687	maker	exon	59469	59567	.	-	.	Parent=Cnem001812-RA;ID=Cnem001812-RA:exon:54915
scaffold_36687	maker	exon	52556	52644	.	-	.	Parent=Cnem001812-RA;ID=Cnem001812-RA:exon:54921
scaffold_36687	maker	exon	52949	53081	.	-	.	Parent=Cnem001812-RA;ID=Cnem001812-RA:exon:54920
scaffold_36687	maker	exon	56433	56818	.	-	.	ID=Cnem001812-RA:exon:54917;Parent=Cnem001812-RA
scaffold_36687	maker	exon	54747	54978	.	-	.	Parent=Cnem001812-RA;ID=Cnem001812-RA:exon:54918
scaffold_36687	maker	exon	48537	48695	.	-	.	Parent=Cnem001812-RA;ID=Cnem001812-RA:exon:54925
scaffold_36687	maker	exon	63819	67491	.	-	.	Parent=Cnem001812-RA;ID=Cnem001812-RA:exon:54913
scaffold_36687	maker	exon	46212	47408	.	-	.	ID=Cnem001812-RA:exon:54926;Parent=Cnem001812-RA
scaffold_36687	maker	exon	49412	49496	.	-	.	Parent=Cnem001812-RA;ID=Cnem001812-RA:exon:54923
scaffold_36687	maker	CDS	49412	49496	.	-	1	ID=Cnem001812-RA:cds_dup662;Parent=Cnem001812-RA
scaffold_36687	maker	CDS	59469	59567	.	-	0	ID=Cnem001812-RA:cds_dup654;Parent=Cnem001812-RA
scaffold_36687	maker	CDS	54747	54978	.	-	0	Parent=Cnem001812-RA;ID=Cnem001812-RA:cds_dup657
scaffold_36687	maker	CDS	53961	54037	.	-	2	ID=Cnem001812-RA:cds_dup658;Parent=Cnem001812-RA
scaffold_36687	maker	CDS	48537	48695	.	-	0	ID=Cnem001812-RA:cds_dup664;Parent=Cnem001812-RA
scaffold_36687	maker	CDS	49070	49108	.	-	0	ID=Cnem001812-RA:cds_dup663;Parent=Cnem001812-RA
scaffold_36687	maker	CDS	52556	52644	.	-	2	ID=Cnem001812-RA:cds_dup660;Parent=Cnem001812-RA
scaffold_36687	maker	CDS	62496	62620	.	-	2	ID=Cnem001812-RA:cds_dup653;Parent=Cnem001812-RA
scaffold_36687	maker	CDS	50442	50641	.	-	0	Parent=Cnem001812-RA;ID=Cnem001812-RA:cds_dup661
scaffold_36687	maker	CDS	58146	58518	.	-	0	ID=Cnem001812-RA:cds_dup655;Parent=Cnem001812-RA
scaffold_36687	maker	CDS	47358	47408	.	-	0	ID=Cnem001812-RA:cds_dup665;Parent=Cnem001812-RA
scaffold_36687	maker	CDS	56433	56818	.	-	2	ID=Cnem001812-RA:cds_dup656;Parent=Cnem001812-RA
scaffold_36687	maker	CDS	63819	67491	.	-	0	Parent=Cnem001812-RA;ID=Cnem001812-RA:cds
scaffold_36687	maker	CDS	52949	53081	.	-	0	ID=Cnem001812-RA:cds_dup659;Parent=Cnem001812-RA
scaffold_36687	maker	gene	4753	6570	.	-	.	Name=Cnem001807;Alias=snap-scaffold_36687-processed-gene-0.81;ID=Cnem001807
scaffold_36687	maker	mRNA	4753	6570	.	-	.	Name=Cnem001807-RA;_eAED=0.44;Parent=Cnem001807;Alias=snap-scaffold_36687-processed-gene-0.81-mRNA-1;_AED=0.44;ID=Cnem001807-RA;_QI=0|0|0|0.33|1|1|3|0|213
scaffold_36687	maker	exon	5309	5466	.	-	.	Parent=Cnem001807-RA;ID=Cnem001807-RA:exon:54931
scaffold_36687	maker	exon	6288	6570	.	-	.	Parent=Cnem001807-RA;ID=Cnem001807-RA:exon:54932
scaffold_36687	maker	exon	4753	4950	.	-	.	Parent=Cnem001807-RA;ID=Cnem001807-RA:exon:54930
scaffold_36687	maker	CDS	4753	4950	.	-	0	Parent=Cnem001807-RA;ID=Cnem001807-RA:cds_dup669
scaffold_36687	maker	CDS	6288	6570	.	-	0	Parent=Cnem001807-RA;ID=Cnem001807-RA:cds
scaffold_36687	maker	CDS	5309	5466	.	-	2	ID=Cnem001807-RA:cds_dup668;Parent=Cnem001807-RA
scaffold_36687	maker	gene	162914	190554	.	-	.	ID=Cnem001816;Alias=maker-scaffold_36687-snap-gene-0.8;Name=Cnem001816
scaffold_36687	maker	mRNA	162914	190554	.	-	.	_eAED=0.62;Name=Cnem001816-RA;Parent=Cnem001816;_AED=0.35;ID=Cnem001816-RA;Alias=maker-scaffold_36687-snap-gene-0.8-mRNA-1;_QI=0|0|0|0.25|0.63|0.66|12|0|563
scaffold_36687	maker	CDS	172828	172845	.	-	0	Parent=Cnem001816-RA;ID=Cnem001816-RA:cds_dup675
scaffold_36687	maker	CDS	171561	171663	.	-	1	Parent=Cnem001816-RA;ID=Cnem001816-RA:cds_dup677
scaffold_36687	maker	CDS	172721	172779	.	-	0	Parent=Cnem001816-RA;ID=Cnem001816-RA:cds_dup676
scaffold_36687	maker	CDS	177635	178022	.	-	1	Parent=Cnem001816-RA;ID=Cnem001816-RA:cds_dup672
scaffold_36687	maker	CDS	162914	163048	.	-	0	ID=Cnem001816-RA:cds_dup680;Parent=Cnem001816-RA
scaffold_36687	maker	CDS	181535	181566	.	-	0	ID=Cnem001816-RA:cds_dup671;Parent=Cnem001816-RA
scaffold_36687	maker	CDS	177165	177307	.	-	2	ID=Cnem001816-RA:cds_dup674;Parent=Cnem001816-RA
scaffold_36687	maker	CDS	190316	190554	.	-	0	ID=Cnem001816-RA:cds;Parent=Cnem001816-RA
scaffold_36687	maker	CDS	165842	165852	.	-	2	ID=Cnem001816-RA:cds_dup679;Parent=Cnem001816-RA
scaffold_36687	maker	CDS	169510	169576	.	-	0	ID=Cnem001816-RA:cds_dup678;Parent=Cnem001816-RA
scaffold_36687	maker	CDS	177325	177550	.	-	0	Parent=Cnem001816-RA;ID=Cnem001816-RA:cds_dup673
scaffold_36687	maker	CDS	189259	189529	.	-	1	Parent=Cnem001816-RA;ID=Cnem001816-RA:cds_dup670
scaffold_36687	maker	exon	177635	178022	.	-	.	Parent=Cnem001816-RA;ID=Cnem001816-RA:exon:54941
scaffold_36687	maker	exon	190316	190554	.	-	.	Parent=Cnem001816-RA;ID=Cnem001816-RA:exon:54944
scaffold_36687	maker	exon	177165	177307	.	-	.	Parent=Cnem001816-RA;ID=Cnem001816-RA:exon:54939
scaffold_36687	maker	exon	181535	181566	.	-	.	Parent=Cnem001816-RA;ID=Cnem001816-RA:exon:54942
scaffold_36687	maker	exon	172828	172845	.	-	.	Parent=Cnem001816-RA;ID=Cnem001816-RA:exon:54938
scaffold_36687	maker	exon	165842	165852	.	-	.	Parent=Cnem001816-RA;ID=Cnem001816-RA:exon:54934
scaffold_36687	maker	exon	169510	169576	.	-	.	ID=Cnem001816-RA:exon:54935;Parent=Cnem001816-RA
scaffold_36687	maker	exon	171561	171663	.	-	.	Parent=Cnem001816-RA;ID=Cnem001816-RA:exon:54936
scaffold_36687	maker	exon	172721	172779	.	-	.	ID=Cnem001816-RA:exon:54937;Parent=Cnem001816-RA
scaffold_36687	maker	exon	189259	189529	.	-	.	Parent=Cnem001816-RA;ID=Cnem001816-RA:exon:54943
scaffold_36687	maker	exon	162914	163048	.	-	.	ID=Cnem001816-RA:exon:54933;Parent=Cnem001816-RA
scaffold_36687	maker	exon	177325	177550	.	-	.	Parent=Cnem001816-RA;ID=Cnem001816-RA:exon:54940
scaffold_36687	maker	gene	445090	448088	.	+	.	Alias=maker-scaffold_36687-snap-gene-1.78;ID=Cnem001823;Name=Cnem001823
scaffold_36687	maker	mRNA	445090	448088	.	+	.	_QI=0|0|0|0.66|1|1|3|0|987;_AED=0.32;ID=Cnem001823-RA;Alias=maker-scaffold_36687-snap-gene-1.78-mRNA-1;Parent=Cnem001823;_eAED=-0.01;Name=Cnem001823-RA
scaffold_36687	maker	CDS	446960	448088	.	+	1	ID=Cnem001823-RA:cds_dup685;Parent=Cnem001823-RA
scaffold_36687	maker	CDS	445090	445542	.	+	0	Parent=Cnem001823-RA;ID=Cnem001823-RA:cds
scaffold_36687	maker	CDS	445560	446941	.	+	0	Parent=Cnem001823-RA;ID=Cnem001823-RA:cds_dup684
scaffold_36687	maker	exon	446960	448088	.	+	.	Parent=Cnem001823-RA;ID=Cnem001823-RA:exon:54953
scaffold_36687	maker	exon	445560	446941	.	+	.	ID=Cnem001823-RA:exon:54952;Parent=Cnem001823-RA
scaffold_36687	maker	exon	445090	445542	.	+	.	ID=Cnem001823-RA:exon:54951;Parent=Cnem001823-RA
scaffold_36687	maker	gene	469069	487115	.	+	.	Alias=maker-scaffold_36687-snap-gene-1.80;ID=Cnem001825;Name=Cnem001825
scaffold_36687	maker	mRNA	469069	487115	.	+	.	Alias=maker-scaffold_36687-snap-gene-1.80-mRNA-1;_AED=0.19;ID=Cnem001825-RA;_QI=68|1|1|1|0|0.4|5|181|320;_eAED=0.19;Name=Cnem001825-RA;Parent=Cnem001825
scaffold_36687	maker	exon	469069	469280	.	+	.	ID=Cnem001825-RA:exon:54955;Parent=Cnem001825-RA
scaffold_36687	maker	exon	472180	472335	.	+	.	Parent=Cnem001825-RA;ID=Cnem001825-RA:exon:54956
scaffold_36687	maker	exon	486671	487115	.	+	.	Parent=Cnem001825-RA;ID=Cnem001825-RA:exon:54959
scaffold_36687	maker	exon	481579	481774	.	+	.	Parent=Cnem001825-RA;ID=Cnem001825-RA:exon:54958
scaffold_36687	maker	exon	473732	473934	.	+	.	Parent=Cnem001825-RA;ID=Cnem001825-RA:exon:54957
scaffold_36687	maker	CDS	472180	472335	.	+	0	ID=Cnem001825-RA:cds_dup686;Parent=Cnem001825-RA
scaffold_36687	maker	CDS	481579	481774	.	+	1	Parent=Cnem001825-RA;ID=Cnem001825-RA:cds_dup688
scaffold_36687	maker	CDS	469137	469280	.	+	0	ID=Cnem001825-RA:cds;Parent=Cnem001825-RA
scaffold_36687	maker	CDS	486671	486934	.	+	0	ID=Cnem001825-RA:cds_dup689;Parent=Cnem001825-RA
scaffold_36687	maker	CDS	473732	473934	.	+	0	ID=Cnem001825-RA:cds_dup687;Parent=Cnem001825-RA
scaffold_36687	maker	gene	365596	382381	.	+	.	Name=Cnem001819;Alias=snap-scaffold_36687-processed-gene-1.34;ID=Cnem001819
scaffold_36687	maker	mRNA	365596	382381	.	+	.	Parent=Cnem001819;Name=Cnem001819-RA;_eAED=0.30;_QI=0|0|0|0.33|1|1|6|0|400;_AED=0.35;Alias=snap-scaffold_36687-processed-gene-1.34-mRNA-1;ID=Cnem001819-RA
scaffold_36687	maker	CDS	375877	376266	.	+	0	ID=Cnem001819-RA:cds_dup690;Parent=Cnem001819-RA
scaffold_36687	maker	CDS	365596	365604	.	+	0	Parent=Cnem001819-RA;ID=Cnem001819-RA:cds
scaffold_36687	maker	CDS	381590	381763	.	+	0	ID=Cnem001819-RA:cds_dup693;Parent=Cnem001819-RA
scaffold_36687	maker	CDS	382229	382381	.	+	0	Parent=Cnem001819-RA;ID=Cnem001819-RA:cds_dup694
scaffold_36687	maker	CDS	378615	378646	.	+	0	ID=Cnem001819-RA:cds_dup691;Parent=Cnem001819-RA
scaffold_36687	maker	CDS	380091	380535	.	+	1	ID=Cnem001819-RA:cds_dup692;Parent=Cnem001819-RA
scaffold_36687	maker	exon	378615	378646	.	+	.	ID=Cnem001819-RA:exon:54962;Parent=Cnem001819-RA
scaffold_36687	maker	exon	380091	380535	.	+	.	Parent=Cnem001819-RA;ID=Cnem001819-RA:exon:54963
scaffold_36687	maker	exon	375877	376266	.	+	.	Parent=Cnem001819-RA;ID=Cnem001819-RA:exon:54961
scaffold_36687	maker	exon	382229	382381	.	+	.	Parent=Cnem001819-RA;ID=Cnem001819-RA:exon:54965
scaffold_36687	maker	exon	365596	365604	.	+	.	Parent=Cnem001819-RA;ID=Cnem001819-RA:exon:54960
scaffold_36687	maker	exon	381590	381763	.	+	.	ID=Cnem001819-RA:exon:54964;Parent=Cnem001819-RA
scaffold_36687	maker	gene	341327	360947	.	-	.	Name=Cnem001818;Alias=augustus-scaffold_36687-processed-gene-1.11;ID=Cnem001818
scaffold_36687	maker	mRNA	341327	360947	.	-	.	_QI=0|0|0|0.33|1|1|6|0|720;_AED=0.37;ID=Cnem001818-RA;Alias=augustus-scaffold_36687-processed-gene-1.11-mRNA-1;Parent=Cnem001818;_eAED=-0.05;Name=Cnem001818-RA
scaffold_36687	maker	exon	348686	348912	.	-	.	ID=Cnem001818-RA:exon:54976;Parent=Cnem001818-RA
scaffold_36687	maker	exon	341327	342081	.	-	.	ID=Cnem001818-RA:exon:54974;Parent=Cnem001818-RA
scaffold_36687	maker	exon	360772	360947	.	-	.	Parent=Cnem001818-RA;ID=Cnem001818-RA:exon:54979
scaffold_36687	maker	exon	353510	353543	.	-	.	ID=Cnem001818-RA:exon:54977;Parent=Cnem001818-RA
scaffold_36687	maker	exon	356454	356920	.	-	.	Parent=Cnem001818-RA;ID=Cnem001818-RA:exon:54978
scaffold_36687	maker	exon	342151	342654	.	-	.	Parent=Cnem001818-RA;ID=Cnem001818-RA:exon:54975
scaffold_36687	maker	CDS	356454	356920	.	-	1	Parent=Cnem001818-RA;ID=Cnem001818-RA:cds_dup697
scaffold_36687	maker	CDS	341327	342081	.	-	2	ID=Cnem001818-RA:cds_dup701;Parent=Cnem001818-RA
scaffold_36687	maker	CDS	348686	348912	.	-	1	ID=Cnem001818-RA:cds_dup699;Parent=Cnem001818-RA
scaffold_36687	maker	CDS	342151	342654	.	-	2	ID=Cnem001818-RA:cds_dup700;Parent=Cnem001818-RA
scaffold_36687	maker	CDS	353510	353543	.	-	2	ID=Cnem001818-RA:cds_dup698;Parent=Cnem001818-RA
scaffold_36687	maker	CDS	360772	360947	.	-	0	Parent=Cnem001818-RA;ID=Cnem001818-RA:cds
scaffold_36687	maker	gene	492012	541594	.	-	.	Name=Cnem001827;Alias=maker-scaffold_36687-augustus-gene-1.72;ID=Cnem001827
scaffold_36687	maker	mRNA	492012	541594	.	-	.	Parent=Cnem001827;_eAED=0.20;Name=Cnem001827-RA;_QI=0|0.66|0.73|0.89|0.61|0.73|19|245|1046;Alias=maker-scaffold_36687-augustus-gene-1.72-mRNA-1;_AED=0.24;ID=Cnem001827-RA
scaffold_36687	maker	CDS	537299	537604	.	-	2	ID=Cnem001827-RA:cds_dup702;Parent=Cnem001827-RA
scaffold_36687	maker	CDS	527348	527428	.	-	0	Parent=Cnem001827-RA;ID=Cnem001827-RA:cds_dup706
scaffold_36687	maker	CDS	496125	496204	.	-	0	Parent=Cnem001827-RA;ID=Cnem001827-RA:cds_dup718
scaffold_36687	maker	CDS	534419	534512	.	-	2	ID=Cnem001827-RA:cds_dup703;Parent=Cnem001827-RA
scaffold_36687	maker	CDS	514349	514585	.	-	2	ID=Cnem001827-RA:cds_dup711;Parent=Cnem001827-RA
scaffold_36687	maker	CDS	541582	541594	.	-	0	ID=Cnem001827-RA:cds;Parent=Cnem001827-RA
scaffold_36687	maker	CDS	522091	522198	.	-	1	Parent=Cnem001827-RA;ID=Cnem001827-RA:cds_dup709
scaffold_36687	maker	CDS	499331	499413	.	-	0	ID=Cnem001827-RA:cds_dup716;Parent=Cnem001827-RA
scaffold_36687	maker	CDS	532370	532536	.	-	1	Parent=Cnem001827-RA;ID=Cnem001827-RA:cds_dup704
scaffold_36687	maker	CDS	498669	498897	.	-	1	Parent=Cnem001827-RA;ID=Cnem001827-RA:cds_dup717
scaffold_36687	maker	CDS	492257	492461	.	-	1	ID=Cnem001827-RA:cds_dup719;Parent=Cnem001827-RA
scaffold_36687	maker	CDS	518410	518474	.	-	1	ID=Cnem001827-RA:cds_dup710;Parent=Cnem001827-RA
scaffold_36687	maker	CDS	528526	528677	.	-	2	Parent=Cnem001827-RA;ID=Cnem001827-RA:cds_dup705
scaffold_36687	maker	CDS	500505	501151	.	-	2	Parent=Cnem001827-RA;ID=Cnem001827-RA:cds_dup715
scaffold_36687	maker	CDS	502934	503019	.	-	0	Parent=Cnem001827-RA;ID=Cnem001827-RA:cds_dup713
scaffold_36687	maker	CDS	526719	526869	.	-	0	ID=Cnem001827-RA:cds_dup707;Parent=Cnem001827-RA
scaffold_36687	maker	CDS	525615	525732	.	-	2	Parent=Cnem001827-RA;ID=Cnem001827-RA:cds_dup708
scaffold_36687	maker	CDS	502093	502250	.	-	1	Parent=Cnem001827-RA;ID=Cnem001827-RA:cds_dup714
scaffold_36687	maker	CDS	504345	504505	.	-	2	Parent=Cnem001827-RA;ID=Cnem001827-RA:cds_dup712
scaffold_36687	maker	exon	492012	492461	.	-	.	Parent=Cnem001827-RA;ID=Cnem001827-RA:exon:54998
scaffold_36687	maker	exon	541582	541594	.	-	.	Parent=Cnem001827-RA;ID=Cnem001827-RA:exon:54980
scaffold_36687	maker	exon	528526	528677	.	-	.	Parent=Cnem001827-RA;ID=Cnem001827-RA:exon:54984
scaffold_36687	maker	exon	537299	537604	.	-	.	ID=Cnem001827-RA:exon:54981;Parent=Cnem001827-RA
scaffold_36687	maker	exon	496125	496204	.	-	.	Parent=Cnem001827-RA;ID=Cnem001827-RA:exon:54997
scaffold_36687	maker	exon	500505	501151	.	-	.	Parent=Cnem001827-RA;ID=Cnem001827-RA:exon:54994
scaffold_36687	maker	exon	499331	499413	.	-	.	Parent=Cnem001827-RA;ID=Cnem001827-RA:exon:54995
scaffold_36687	maker	exon	525615	525732	.	-	.	ID=Cnem001827-RA:exon:54987;Parent=Cnem001827-RA
scaffold_36687	maker	exon	502093	502250	.	-	.	ID=Cnem001827-RA:exon:54993;Parent=Cnem001827-RA
scaffold_36687	maker	exon	527348	527428	.	-	.	Parent=Cnem001827-RA;ID=Cnem001827-RA:exon:54985
scaffold_36687	maker	exon	518410	518474	.	-	.	Parent=Cnem001827-RA;ID=Cnem001827-RA:exon:54989
scaffold_36687	maker	exon	514349	514585	.	-	.	ID=Cnem001827-RA:exon:54990;Parent=Cnem001827-RA
scaffold_36687	maker	exon	502934	503019	.	-	.	ID=Cnem001827-RA:exon:54992;Parent=Cnem001827-RA
scaffold_36687	maker	exon	534419	534512	.	-	.	ID=Cnem001827-RA:exon:54982;Parent=Cnem001827-RA
scaffold_36687	maker	exon	526719	526869	.	-	.	Parent=Cnem001827-RA;ID=Cnem001827-RA:exon:54986
scaffold_36687	maker	exon	522091	522198	.	-	.	ID=Cnem001827-RA:exon:54988;Parent=Cnem001827-RA
scaffold_36687	maker	exon	504345	504505	.	-	.	ID=Cnem001827-RA:exon:54991;Parent=Cnem001827-RA
scaffold_36687	maker	exon	498669	498897	.	-	.	Parent=Cnem001827-RA;ID=Cnem001827-RA:exon:54996
scaffold_36687	maker	exon	532370	532536	.	-	.	ID=Cnem001827-RA:exon:54983;Parent=Cnem001827-RA
scaffold_36687	maker	gene	701627	705218	.	+	.	Name=Cnem001837;ID=Cnem001837;Alias=maker-scaffold_36687-augustus-gene-2.19
scaffold_36687	maker	mRNA	701627	705218	.	+	.	Parent=Cnem001837;_eAED=-0.11;Name=Cnem001837-RA;_QI=0|0|0|1|1|1|2|0|1144;_AED=0.22;Alias=maker-scaffold_36687-augustus-gene-2.19-mRNA-1;ID=Cnem001837-RA
scaffold_36687	maker	CDS	701627	703456	.	+	0	Parent=Cnem001837-RA;ID=Cnem001837-RA:cds
scaffold_36687	maker	CDS	703614	705218	.	+	0	Parent=Cnem001837-RA;ID=Cnem001837-RA:cds_dup721
scaffold_36687	maker	exon	701627	703456	.	+	.	ID=Cnem001837-RA:exon:55004;Parent=Cnem001837-RA
scaffold_36687	maker	exon	703614	705218	.	+	.	ID=Cnem001837-RA:exon:55005;Parent=Cnem001837-RA
scaffold_36687	maker	gene	853527	859715	.	+	.	ID=Cnem001843;Alias=maker-scaffold_36687-augustus-gene-2.21;Name=Cnem001843
scaffold_36687	maker	mRNA	853527	859715	.	+	.	Name=Cnem001843-RA;_eAED=0.00;Parent=Cnem001843;_AED=0.00;ID=Cnem001843-RA;Alias=maker-scaffold_36687-augustus-gene-2.21-mRNA-1;_QI=57|1|1|1|0.5|0.66|3|1745|103
scaffold_36687	maker	CDS	857933	857970	.	+	2	ID=Cnem001843-RA:cds_dup723;Parent=Cnem001843-RA
scaffold_36687	maker	CDS	853584	853770	.	+	0	Parent=Cnem001843-RA;ID=Cnem001843-RA:cds
scaffold_36687	maker	CDS	855989	856075	.	+	2	Parent=Cnem001843-RA;ID=Cnem001843-RA:cds_dup722
scaffold_36687	maker	exon	855989	856075	.	+	.	ID=Cnem001843-RA:exon:55007;Parent=Cnem001843-RA
scaffold_36687	maker	exon	853527	853770	.	+	.	ID=Cnem001843-RA:exon:55006;Parent=Cnem001843-RA
scaffold_36687	maker	exon	857933	859715	.	+	.	ID=Cnem001843-RA:exon:55008;Parent=Cnem001843-RA
scaffold_36687	maker	gene	599979	635368	.	-	.	Name=Cnem001830;ID=Cnem001830;Alias=maker-scaffold_36687-snap-gene-2.10
scaffold_36687	maker	mRNA	599979	635368	.	-	.	Parent=Cnem001830;Name=Cnem001830-RA;_eAED=0.17;_QI=203|0.83|1|1|0|0.28|7|993|281;Alias=maker-scaffold_36687-snap-gene-2.10-mRNA-1;_AED=0.17;ID=Cnem001830-RA
scaffold_36687	maker	exon	599979	601027	.	-	.	Parent=Cnem001830-RA;ID=Cnem001830-RA:exon:55035
scaffold_36687	maker	exon	628809	629045	.	-	.	Parent=Cnem001830-RA;ID=Cnem001830-RA:exon:55031
scaffold_36687	maker	exon	604439	604519	.	-	.	Parent=Cnem001830-RA;ID=Cnem001830-RA:exon:55034
scaffold_36687	maker	exon	613397	613531	.	-	.	ID=Cnem001830-RA:exon:55033;Parent=Cnem001830-RA
scaffold_36687	maker	exon	629446	629646	.	-	.	Parent=Cnem001830-RA;ID=Cnem001830-RA:exon:55030
scaffold_36687	maker	exon	625264	625413	.	-	.	ID=Cnem001830-RA:exon:55032;Parent=Cnem001830-RA
scaffold_36687	maker	exon	635180	635368	.	-	.	ID=Cnem001830-RA:exon:55029;Parent=Cnem001830-RA
scaffold_36687	maker	CDS	613397	613531	.	-	2	Parent=Cnem001830-RA;ID=Cnem001830-RA:cds_dup729
scaffold_36687	maker	CDS	600972	601027	.	-	2	Parent=Cnem001830-RA;ID=Cnem001830-RA:cds_dup731
scaffold_36687	maker	CDS	629446	629632	.	-	0	ID=Cnem001830-RA:cds;Parent=Cnem001830-RA
scaffold_36687	maker	CDS	625264	625413	.	-	2	Parent=Cnem001830-RA;ID=Cnem001830-RA:cds_dup728
scaffold_36687	maker	CDS	628809	629045	.	-	2	ID=Cnem001830-RA:cds_dup727;Parent=Cnem001830-RA
scaffold_36687	maker	CDS	604439	604519	.	-	2	Parent=Cnem001830-RA;ID=Cnem001830-RA:cds_dup730
scaffold_36687	maker	gene	796487	808842	.	-	.	Name=Cnem001840;Alias=maker-scaffold_36687-snap-gene-2.11;ID=Cnem001840
scaffold_36687	maker	mRNA	796487	808842	.	-	.	Parent=Cnem001840;_eAED=0.71;Name=Cnem001840-RA;_QI=0|0|0|0.42|0.66|0.85|7|0|495;_AED=0.43;ID=Cnem001840-RA;Alias=maker-scaffold_36687-snap-gene-2.11-mRNA-1
scaffold_36687	maker	CDS	801293	801490	.	-	2	Parent=Cnem001840-RA;ID=Cnem001840-RA:cds_dup733
scaffold_36687	maker	CDS	806971	807076	.	-	0	ID=Cnem001840-RA:cds_dup732;Parent=Cnem001840-RA
scaffold_36687	maker	CDS	799492	799653	.	-	0	Parent=Cnem001840-RA;ID=Cnem001840-RA:cds_dup736
scaffold_36687	maker	CDS	800032	800306	.	-	2	Parent=Cnem001840-RA;ID=Cnem001840-RA:cds_dup735
scaffold_36687	maker	CDS	796487	796756	.	-	0	ID=Cnem001840-RA:cds_dup737;Parent=Cnem001840-RA
scaffold_36687	maker	CDS	808603	808842	.	-	0	Parent=Cnem001840-RA;ID=Cnem001840-RA:cds
scaffold_36687	maker	CDS	800697	800933	.	-	2	ID=Cnem001840-RA:cds_dup734;Parent=Cnem001840-RA
scaffold_36687	maker	exon	806971	807076	.	-	.	ID=Cnem001840-RA:exon:55042;Parent=Cnem001840-RA
scaffold_36687	maker	exon	799492	799653	.	-	.	ID=Cnem001840-RA:exon:55038;Parent=Cnem001840-RA
scaffold_36687	maker	exon	796487	796756	.	-	.	ID=Cnem001840-RA:exon:55037;Parent=Cnem001840-RA
scaffold_36687	maker	exon	801293	801490	.	-	.	ID=Cnem001840-RA:exon:55041;Parent=Cnem001840-RA
scaffold_36687	maker	exon	800032	800306	.	-	.	ID=Cnem001840-RA:exon:55039;Parent=Cnem001840-RA
scaffold_36687	maker	exon	808603	808842	.	-	.	ID=Cnem001840-RA:exon:55043;Parent=Cnem001840-RA
scaffold_36687	maker	exon	800697	800933	.	-	.	Parent=Cnem001840-RA;ID=Cnem001840-RA:exon:55040
scaffold_36687	maker	gene	846608	847990	.	-	.	Alias=maker-scaffold_36687-snap-gene-2.17;ID=Cnem001842;Name=Cnem001842
scaffold_36687	maker	mRNA	846608	847990	.	-	.	Name=Cnem001842-RA;_eAED=1.00;Parent=Cnem001842;_AED=0.40;Alias=maker-scaffold_36687-snap-gene-2.17-mRNA-1;ID=Cnem001842-RA;_QI=0|0|0|0.66|0|0|3|0|366
scaffold_36687	maker	exon	846608	847021	.	-	.	ID=Cnem001842-RA:exon:55049;Parent=Cnem001842-RA
scaffold_36687	maker	exon	847109	847309	.	-	.	ID=Cnem001842-RA:exon:55050;Parent=Cnem001842-RA
scaffold_36687	maker	exon	847505	847990	.	-	.	ID=Cnem001842-RA:exon:55051;Parent=Cnem001842-RA
scaffold_36687	maker	CDS	847505	847990	.	-	0	Parent=Cnem001842-RA;ID=Cnem001842-RA:cds
scaffold_36687	maker	CDS	846608	847021	.	-	0	Parent=Cnem001842-RA;ID=Cnem001842-RA:cds_dup740
scaffold_36687	maker	CDS	847109	847309	.	-	0	Parent=Cnem001842-RA;ID=Cnem001842-RA:cds_dup739
scaffold_36687	maker	gene	939989	988366	.	+	.	Alias=maker-scaffold_36687-snap-gene-3.0;ID=Cnem001847;Name=Cnem001847
scaffold_36687	maker	mRNA	939989	988366	.	+	.	Name=Cnem001847-RA;_eAED=0.17;Parent=Cnem001847;_AED=0.17;ID=Cnem001847-RA;Alias=maker-scaffold_36687-snap-gene-3.0-mRNA-1;_QI=133|0.9|0.90|1|0.55|0.66|21|702|771
scaffold_36687	maker	exon	979724	979832	.	+	.	ID=Cnem001847-RA:exon:55074;Parent=Cnem001847-RA
scaffold_36687	maker	exon	960730	960920	.	+	.	Parent=Cnem001847-RA;ID=Cnem001847-RA:exon:55064
scaffold_36687	maker	exon	960432	960587	.	+	.	Parent=Cnem001847-RA;ID=Cnem001847-RA:exon:55063
scaffold_36687	maker	exon	953820	954277	.	+	.	ID=Cnem001847-RA:exon:55061;Parent=Cnem001847-RA
scaffold_36687	maker	exon	984270	984384	.	+	.	ID=Cnem001847-RA:exon:55076;Parent=Cnem001847-RA
scaffold_36687	maker	exon	987447	988250	.	+	.	ID=Cnem001847-RA:exon:55077;Parent=Cnem001847-RA
scaffold_36687	maker	exon	961435	961483	.	+	.	Parent=Cnem001847-RA;ID=Cnem001847-RA:exon:55065
scaffold_36687	maker	exon	974355	974437	.	+	.	Parent=Cnem001847-RA;ID=Cnem001847-RA:exon:55070
scaffold_36687	maker	exon	963739	963785	.	+	.	ID=Cnem001847-RA:exon:55066;Parent=Cnem001847-RA
scaffold_36687	maker	exon	978059	978176	.	+	.	ID=Cnem001847-RA:exon:55073;Parent=Cnem001847-RA
scaffold_36687	maker	exon	939989	940146	.	+	.	ID=Cnem001847-RA:exon:55058;Parent=Cnem001847-RA
scaffold_36687	maker	exon	972013	972136	.	+	.	ID=Cnem001847-RA:exon:55068;Parent=Cnem001847-RA
scaffold_36687	maker	exon	976681	976758	.	+	.	Parent=Cnem001847-RA;ID=Cnem001847-RA:exon:55072
scaffold_36687	maker	exon	969057	969087	.	+	.	ID=Cnem001847-RA:exon:55067;Parent=Cnem001847-RA
scaffold_36687	maker	exon	948469	948608	.	+	.	Parent=Cnem001847-RA;ID=Cnem001847-RA:exon:55060
scaffold_36687	maker	exon	975403	975454	.	+	.	Parent=Cnem001847-RA;ID=Cnem001847-RA:exon:55071
scaffold_36687	maker	exon	946394	946449	.	+	.	Parent=Cnem001847-RA;ID=Cnem001847-RA:exon:55059
scaffold_36687	maker	exon	958508	958654	.	+	.	ID=Cnem001847-RA:exon:55062;Parent=Cnem001847-RA
scaffold_36687	maker	exon	972886	973033	.	+	.	Parent=Cnem001847-RA;ID=Cnem001847-RA:exon:55069
scaffold_36687	maker	exon	988343	988366	.	+	.	Parent=Cnem001847-RA;ID=Cnem001847-RA:exon:55078
scaffold_36687	maker	exon	982022	982084	.	+	.	Parent=Cnem001847-RA;ID=Cnem001847-RA:exon:55075
scaffold_36687	maker	CDS	940122	940146	.	+	0	Parent=Cnem001847-RA;ID=Cnem001847-RA:cds
scaffold_36687	maker	CDS	963739	963785	.	+	2	Parent=Cnem001847-RA;ID=Cnem001847-RA:cds_dup749
scaffold_36687	maker	CDS	953820	954277	.	+	1	ID=Cnem001847-RA:cds_dup744;Parent=Cnem001847-RA
scaffold_36687	maker	CDS	975403	975454	.	+	1	ID=Cnem001847-RA:cds_dup754;Parent=Cnem001847-RA
scaffold_36687	maker	CDS	984270	984384	.	+	1	Parent=Cnem001847-RA;ID=Cnem001847-RA:cds_dup759
scaffold_36687	maker	CDS	969057	969087	.	+	0	Parent=Cnem001847-RA;ID=Cnem001847-RA:cds_dup750
scaffold_36687	maker	CDS	960432	960587	.	+	2	ID=Cnem001847-RA:cds_dup746;Parent=Cnem001847-RA
scaffold_36687	maker	CDS	982022	982084	.	+	1	ID=Cnem001847-RA:cds_dup758;Parent=Cnem001847-RA
scaffold_36687	maker	CDS	961435	961483	.	+	0	ID=Cnem001847-RA:cds_dup748;Parent=Cnem001847-RA
scaffold_36687	maker	CDS	979724	979832	.	+	2	ID=Cnem001847-RA:cds_dup757;Parent=Cnem001847-RA
scaffold_36687	maker	CDS	978059	978176	.	+	0	Parent=Cnem001847-RA;ID=Cnem001847-RA:cds_dup756
scaffold_36687	maker	CDS	974355	974437	.	+	0	ID=Cnem001847-RA:cds_dup753;Parent=Cnem001847-RA
scaffold_36687	maker	CDS	960730	960920	.	+	2	ID=Cnem001847-RA:cds_dup747;Parent=Cnem001847-RA
scaffold_36687	maker	CDS	987447	987572	.	+	0	ID=Cnem001847-RA:cds_dup760;Parent=Cnem001847-RA
scaffold_36687	maker	CDS	972886	973033	.	+	1	ID=Cnem001847-RA:cds_dup752;Parent=Cnem001847-RA
scaffold_36687	maker	CDS	976681	976758	.	+	0	ID=Cnem001847-RA:cds_dup755;Parent=Cnem001847-RA
scaffold_36687	maker	CDS	972013	972136	.	+	2	ID=Cnem001847-RA:cds_dup751;Parent=Cnem001847-RA
scaffold_36687	maker	CDS	948469	948608	.	+	0	Parent=Cnem001847-RA;ID=Cnem001847-RA:cds_dup743
scaffold_36687	maker	CDS	946394	946449	.	+	2	Parent=Cnem001847-RA;ID=Cnem001847-RA:cds_dup742
scaffold_36687	maker	CDS	958508	958654	.	+	2	Parent=Cnem001847-RA;ID=Cnem001847-RA:cds_dup745
scaffold_36687	maker	gene	1081853	1121732	.	+	.	Name=Cnem001851;Alias=maker-scaffold_36687-snap-gene-3.1;ID=Cnem001851
scaffold_36687	maker	mRNA	1081853	1121732	.	+	.	Alias=maker-scaffold_36687-snap-gene-3.1-mRNA-1;_AED=0.39;ID=Cnem001851-RA;_QI=93|1|0.90|1|0.7|0.81|11|0|289;Name=Cnem001851-RA;_eAED=0.39;Parent=Cnem001851
scaffold_36687	maker	CDS	1112204	1112316	.	+	0	Parent=Cnem001851-RA;ID=Cnem001851-RA:cds_dup770
scaffold_36687	maker	CDS	1081946	1081977	.	+	0	ID=Cnem001851-RA:cds;Parent=Cnem001851-RA
scaffold_36687	maker	CDS	1095161	1095212	.	+	0	ID=Cnem001851-RA:cds_dup765;Parent=Cnem001851-RA
scaffold_36687	maker	CDS	1106620	1106687	.	+	1	ID=Cnem001851-RA:cds_dup768;Parent=Cnem001851-RA
scaffold_36687	maker	CDS	1092540	1092609	.	+	1	ID=Cnem001851-RA:cds_dup764;Parent=Cnem001851-RA
scaffold_36687	maker	CDS	1100934	1101025	.	+	2	ID=Cnem001851-RA:cds_dup766;Parent=Cnem001851-RA
scaffold_36687	maker	CDS	1121657	1121732	.	+	1	ID=Cnem001851-RA:cds_dup771;Parent=Cnem001851-RA
scaffold_36687	maker	CDS	1086222	1086328	.	+	1	ID=Cnem001851-RA:cds_dup762;Parent=Cnem001851-RA
scaffold_36687	maker	CDS	1089447	1089531	.	+	2	Parent=Cnem001851-RA;ID=Cnem001851-RA:cds_dup763
scaffold_36687	maker	CDS	1109426	1109505	.	+	2	ID=Cnem001851-RA:cds_dup769;Parent=Cnem001851-RA
scaffold_36687	maker	CDS	1105640	1105731	.	+	0	Parent=Cnem001851-RA;ID=Cnem001851-RA:cds_dup767
scaffold_36687	maker	exon	1109426	1109505	.	+	.	ID=Cnem001851-RA:exon:55089;Parent=Cnem001851-RA
scaffold_36687	maker	exon	1092540	1092609	.	+	.	ID=Cnem001851-RA:exon:55084;Parent=Cnem001851-RA
scaffold_36687	maker	exon	1100934	1101025	.	+	.	Parent=Cnem001851-RA;ID=Cnem001851-RA:exon:55086
scaffold_36687	maker	exon	1105640	1105731	.	+	.	Parent=Cnem001851-RA;ID=Cnem001851-RA:exon:55087
scaffold_36687	maker	exon	1086222	1086328	.	+	.	ID=Cnem001851-RA:exon:55082;Parent=Cnem001851-RA
scaffold_36687	maker	exon	1081853	1081977	.	+	.	Parent=Cnem001851-RA;ID=Cnem001851-RA:exon:55081
scaffold_36687	maker	exon	1121657	1121732	.	+	.	ID=Cnem001851-RA:exon:55091;Parent=Cnem001851-RA
scaffold_36687	maker	exon	1089447	1089531	.	+	.	ID=Cnem001851-RA:exon:55083;Parent=Cnem001851-RA
scaffold_36687	maker	exon	1095161	1095212	.	+	.	ID=Cnem001851-RA:exon:55085;Parent=Cnem001851-RA
scaffold_36687	maker	exon	1106620	1106687	.	+	.	ID=Cnem001851-RA:exon:55088;Parent=Cnem001851-RA
scaffold_36687	maker	exon	1112204	1112316	.	+	.	Parent=Cnem001851-RA;ID=Cnem001851-RA:exon:55090
scaffold_36687	maker	gene	1004597	1054728	.	-	.	Alias=maker-scaffold_36687-snap-gene-3.5;ID=Cnem001849;Name=Cnem001849
scaffold_36687	maker	mRNA	1004597	1054728	.	-	.	Parent=Cnem001849;_eAED=0.24;Name=Cnem001849-RA;_QI=2920|0.94|0.94|1|0.47|0.66|18|134|92;_AED=0.24;Alias=maker-scaffold_36687-snap-gene-3.5-mRNA-1;ID=Cnem001849-RA
scaffold_36687	maker	CDS	1005494	1005648	.	-	0	Parent=Cnem001849-RA;ID=Cnem001849-RA:cds
scaffold_36687	maker	CDS	1004731	1004854	.	-	1	ID=Cnem001849-RA:cds_dup773;Parent=Cnem001849-RA
scaffold_36687	maker	exon	1044236	1044346	.	-	.	Parent=Cnem001849-RA;ID=Cnem001849-RA:exon:55101
scaffold_36687	maker	exon	1045358	1045455	.	-	.	Parent=Cnem001849-RA;ID=Cnem001849-RA:exon:55100
scaffold_36687	maker	exon	1019642	1019720	.	-	.	Parent=Cnem001849-RA;ID=Cnem001849-RA:exon:55109
scaffold_36687	maker	exon	1005494	1006904	.	-	.	ID=Cnem001849-RA:exon:55112;Parent=Cnem001849-RA
scaffold_36687	maker	exon	1034973	1035099	.	-	.	ID=Cnem001849-RA:exon:55104;Parent=Cnem001849-RA
scaffold_36687	maker	exon	1054539	1054728	.	-	.	Parent=Cnem001849-RA;ID=Cnem001849-RA:exon:55096
scaffold_36687	maker	exon	1014520	1014662	.	-	.	ID=Cnem001849-RA:exon:55111;Parent=Cnem001849-RA
scaffold_36687	maker	exon	1028869	1028959	.	-	.	ID=Cnem001849-RA:exon:55106;Parent=Cnem001849-RA
scaffold_36687	maker	exon	1031926	1032010	.	-	.	ID=Cnem001849-RA:exon:55105;Parent=Cnem001849-RA
scaffold_36687	maker	exon	1020875	1021040	.	-	.	Parent=Cnem001849-RA;ID=Cnem001849-RA:exon:55108
scaffold_36687	maker	exon	1045581	1045644	.	-	.	ID=Cnem001849-RA:exon:55099;Parent=Cnem001849-RA
scaffold_36687	maker	exon	1004597	1004854	.	-	.	Parent=Cnem001849-RA;ID=Cnem001849-RA:exon:55113
scaffold_36687	maker	exon	1047075	1047109	.	-	.	Parent=Cnem001849-RA;ID=Cnem001849-RA:exon:55098
scaffold_36687	maker	exon	1036756	1036861	.	-	.	Parent=Cnem001849-RA;ID=Cnem001849-RA:exon:55103
scaffold_36687	maker	exon	1016041	1016132	.	-	.	Parent=Cnem001849-RA;ID=Cnem001849-RA:exon:55110
scaffold_36687	maker	exon	1027204	1027261	.	-	.	ID=Cnem001849-RA:exon:55107;Parent=Cnem001849-RA
scaffold_36687	maker	exon	1052707	1052827	.	-	.	ID=Cnem001849-RA:exon:55097;Parent=Cnem001849-RA
scaffold_36687	maker	exon	1040501	1040598	.	-	.	ID=Cnem001849-RA:exon:55102;Parent=Cnem001849-RA
scaffold_36687	maker	gene	1673715	1675810	.	+	.	Name=Cnem001878;ID=Cnem001878;Alias=maker-scaffold_36687-snap-gene-4.21
scaffold_36687	maker	mRNA	1673715	1675810	.	+	.	Parent=Cnem001878;Name=Cnem001878-RA;_eAED=0.11;_QI=0|0|0|1|0|0.25|4|0|671;_AED=0.16;Alias=maker-scaffold_36687-snap-gene-4.21-mRNA-1;ID=Cnem001878-RA
scaffold_36687	maker	exon	1674955	1675124	.	+	.	Parent=Cnem001878-RA;ID=Cnem001878-RA:exon:55139
scaffold_36687	maker	exon	1675393	1675810	.	+	.	ID=Cnem001878-RA:exon:55141;Parent=Cnem001878-RA
scaffold_36687	maker	exon	1673715	1674926	.	+	.	Parent=Cnem001878-RA;ID=Cnem001878-RA:exon:55138
scaffold_36687	maker	exon	1675130	1675345	.	+	.	ID=Cnem001878-RA:exon:55140;Parent=Cnem001878-RA
scaffold_36687	maker	CDS	1675130	1675345	.	+	1	Parent=Cnem001878-RA;ID=Cnem001878-RA:cds_dup779
scaffold_36687	maker	CDS	1674955	1675124	.	+	0	ID=Cnem001878-RA:cds_dup778;Parent=Cnem001878-RA
scaffold_36687	maker	CDS	1675393	1675810	.	+	1	ID=Cnem001878-RA:cds_dup780;Parent=Cnem001878-RA
scaffold_36687	maker	CDS	1673715	1674926	.	+	0	Parent=Cnem001878-RA;ID=Cnem001878-RA:cds
scaffold_36687	maker	gene	1370367	1371605	.	+	.	Name=Cnem001862;ID=Cnem001862;Alias=snap-scaffold_36687-processed-gene-4.158
scaffold_36687	maker	mRNA	1370367	1371605	.	+	.	_QI=0|-1|0|1|-1|1|1|0|412;Alias=snap-scaffold_36687-processed-gene-4.158-mRNA-1;_AED=0.31;ID=Cnem001862-RA;Parent=Cnem001862;_eAED=0.31;Name=Cnem001862-RA
scaffold_36687	maker	exon	1370367	1371605	.	+	.	Parent=Cnem001862-RA;ID=Cnem001862-RA:exon:55144
scaffold_36687	maker	CDS	1370367	1371605	.	+	0	ID=Cnem001862-RA:cds;Parent=Cnem001862-RA
scaffold_36687	maker	gene	1367654	1369359	.	+	.	ID=Cnem001861;Alias=maker-scaffold_36687-augustus-gene-4.296;Name=Cnem001861
scaffold_36687	maker	mRNA	1367654	1369359	.	+	.	_QI=0|1|0.5|1|1|1|2|1178|51;Alias=maker-scaffold_36687-augustus-gene-4.296-mRNA-1;_AED=0.34;ID=Cnem001861-RA;Parent=Cnem001861;_eAED=0.34;Name=Cnem001861-RA
scaffold_36687	maker	exon	1367654	1367758	.	+	.	Parent=Cnem001861-RA;ID=Cnem001861-RA:exon:55145
scaffold_36687	maker	exon	1368131	1369359	.	+	.	Parent=Cnem001861-RA;ID=Cnem001861-RA:exon:55146
scaffold_36687	maker	CDS	1367654	1367758	.	+	0	Parent=Cnem001861-RA;ID=Cnem001861-RA:cds
scaffold_36687	maker	CDS	1368131	1368181	.	+	0	Parent=Cnem001861-RA;ID=Cnem001861-RA:cds_dup781
scaffold_36687	maker	gene	1615000	1616053	.	-	.	Alias=maker-scaffold_36687-snap-gene-4.47;ID=Cnem001876;Name=Cnem001876
scaffold_36687	maker	mRNA	1615000	1616053	.	-	.	Alias=maker-scaffold_36687-snap-gene-4.47-mRNA-1;_AED=0.25;ID=Cnem001876-RA;_QI=0|0|0.5|0.5|0|0|2|330|164;Name=Cnem001876-RA;_eAED=-0.25;Parent=Cnem001876
scaffold_36687	maker	exon	1615000	1615498	.	-	.	Parent=Cnem001876-RA;ID=Cnem001876-RA:exon:55167
scaffold_36687	maker	exon	1615728	1616053	.	-	.	Parent=Cnem001876-RA;ID=Cnem001876-RA:exon:55166
scaffold_36687	maker	CDS	1615330	1615498	.	-	1	ID=Cnem001876-RA:cds_dup783;Parent=Cnem001876-RA
scaffold_36687	maker	CDS	1615728	1616053	.	-	0	Parent=Cnem001876-RA;ID=Cnem001876-RA:cds
scaffold_36687	maker	gene	1705524	1707135	.	-	.	Name=Cnem001880;ID=Cnem001880;Alias=maker-scaffold_36687-augustus-gene-4.309
scaffold_36687	maker	mRNA	1705524	1707135	.	-	.	Name=Cnem001880-RA;_eAED=0.03;Parent=Cnem001880;ID=Cnem001880-RA;_AED=0.16;Alias=maker-scaffold_36687-augustus-gene-4.309-mRNA-1;_QI=0|0|0|0.66|0|0.33|3|0|195
scaffold_36687	maker	CDS	1705524	1705877	.	-	0	Parent=Cnem001880-RA;ID=Cnem001880-RA:cds_dup785
scaffold_36687	maker	CDS	1707024	1707135	.	-	0	Parent=Cnem001880-RA;ID=Cnem001880-RA:cds
scaffold_36687	maker	CDS	1706055	1706176	.	-	2	ID=Cnem001880-RA:cds_dup784;Parent=Cnem001880-RA
scaffold_36687	maker	exon	1705524	1705877	.	-	.	Parent=Cnem001880-RA;ID=Cnem001880-RA:exon:55170
scaffold_36687	maker	exon	1707024	1707135	.	-	.	Parent=Cnem001880-RA;ID=Cnem001880-RA:exon:55172
scaffold_36687	maker	exon	1706055	1706176	.	-	.	ID=Cnem001880-RA:exon:55171;Parent=Cnem001880-RA
scaffold_36687	maker	gene	1551612	1570450	.	-	.	Name=Cnem001874;Alias=maker-scaffold_36687-augustus-gene-4.308;ID=Cnem001874
scaffold_36687	maker	mRNA	1551612	1570450	.	-	.	_eAED=0.09;Name=Cnem001874-RA;Parent=Cnem001874;_AED=0.02;Alias=maker-scaffold_36687-augustus-gene-4.308-mRNA-1;ID=Cnem001874-RA;_QI=0|0.62|0.55|0.88|0.87|0.66|9|638|400
scaffold_36687	maker	CDS	1570394	1570450	.	-	0	ID=Cnem001874-RA:cds;Parent=Cnem001874-RA
scaffold_36687	maker	CDS	1561075	1561218	.	-	0	Parent=Cnem001874-RA;ID=Cnem001874-RA:cds_dup789
scaffold_36687	maker	CDS	1552491	1552635	.	-	1	Parent=Cnem001874-RA;ID=Cnem001874-RA:cds_dup792
scaffold_36687	maker	CDS	1562508	1562783	.	-	0	Parent=Cnem001874-RA;ID=Cnem001874-RA:cds_dup788
scaffold_36687	maker	CDS	1555061	1555230	.	-	0	ID=Cnem001874-RA:cds_dup791;Parent=Cnem001874-RA
scaffold_36687	maker	CDS	1559318	1559455	.	-	0	Parent=Cnem001874-RA;ID=Cnem001874-RA:cds_dup790
scaffold_36687	maker	CDS	1567652	1567784	.	-	0	ID=Cnem001874-RA:cds_dup786;Parent=Cnem001874-RA
scaffold_36687	maker	CDS	1565594	1565733	.	-	2	ID=Cnem001874-RA:cds_dup787;Parent=Cnem001874-RA
scaffold_36687	maker	exon	1561075	1561218	.	-	.	Parent=Cnem001874-RA;ID=Cnem001874-RA:exon:55178
scaffold_36687	maker	exon	1567652	1567784	.	-	.	ID=Cnem001874-RA:exon:55175;Parent=Cnem001874-RA
scaffold_36687	maker	exon	1551990	1552635	.	-	.	Parent=Cnem001874-RA;ID=Cnem001874-RA:exon:55181
scaffold_36687	maker	exon	1570394	1570450	.	-	.	Parent=Cnem001874-RA;ID=Cnem001874-RA:exon:55174
scaffold_36687	maker	exon	1562508	1562783	.	-	.	ID=Cnem001874-RA:exon:55177;Parent=Cnem001874-RA
scaffold_36687	maker	exon	1551612	1551748	.	-	.	ID=Cnem001874-RA:exon:55182;Parent=Cnem001874-RA
scaffold_36687	maker	exon	1559318	1559455	.	-	.	Parent=Cnem001874-RA;ID=Cnem001874-RA:exon:55179
scaffold_36687	maker	exon	1555061	1555230	.	-	.	Parent=Cnem001874-RA;ID=Cnem001874-RA:exon:55180
scaffold_36687	maker	exon	1565594	1565733	.	-	.	ID=Cnem001874-RA:exon:55176;Parent=Cnem001874-RA
scaffold_36687	maker	gene	1374506	1377216	.	-	.	Alias=maker-scaffold_36687-snap-gene-4.35;ID=Cnem001863;Name=Cnem001863
scaffold_36687	maker	mRNA	1374506	1377216	.	-	.	Name=Cnem001863-RA;_eAED=0.23;Parent=Cnem001863;ID=Cnem001863-RA;_AED=0.30;Alias=maker-scaffold_36687-snap-gene-4.35-mRNA-1;_QI=0|0|0|0.5|0|0.25|4|0|597
scaffold_36687	maker	CDS	1376265	1376618	.	-	2	Parent=Cnem001863-RA;ID=Cnem001863-RA:cds_dup794
scaffold_36687	maker	CDS	1374506	1374769	.	-	0	Parent=Cnem001863-RA;ID=Cnem001863-RA:cds_dup796
scaffold_36687	maker	CDS	1374876	1375672	.	-	2	ID=Cnem001863-RA:cds_dup795;Parent=Cnem001863-RA
scaffold_36687	maker	CDS	1376838	1377216	.	-	0	Parent=Cnem001863-RA;ID=Cnem001863-RA:cds
scaffold_36687	maker	exon	1376265	1376618	.	-	.	ID=Cnem001863-RA:exon:55189;Parent=Cnem001863-RA
scaffold_36687	maker	exon	1374876	1375672	.	-	.	ID=Cnem001863-RA:exon:55188;Parent=Cnem001863-RA
scaffold_36687	maker	exon	1374506	1374769	.	-	.	Parent=Cnem001863-RA;ID=Cnem001863-RA:exon:55187
scaffold_36687	maker	exon	1376838	1377216	.	-	.	ID=Cnem001863-RA:exon:55190;Parent=Cnem001863-RA
scaffold_36687	maker	gene	1391285	1393448	.	-	.	ID=Cnem001864;Alias=maker-scaffold_36687-snap-gene-4.38;Name=Cnem001864
scaffold_36687	maker	mRNA	1391285	1393448	.	-	.	ID=Cnem001864-RA;_AED=0.13;Alias=maker-scaffold_36687-snap-gene-4.38-mRNA-1;_QI=0|0|0|0.83|0.6|0.33|6|0|643;_eAED=0.50;Name=Cnem001864-RA;Parent=Cnem001864
scaffold_36687	maker	CDS	1393063	1393237	.	-	1	Parent=Cnem001864-RA;ID=Cnem001864-RA:cds_dup799
scaffold_36687	maker	CDS	1392480	1392996	.	-	0	Parent=Cnem001864-RA;ID=Cnem001864-RA:cds_dup800
scaffold_36687	maker	CDS	1392164	1392445	.	-	2	Parent=Cnem001864-RA;ID=Cnem001864-RA:cds_dup801
scaffold_36687	maker	CDS	1393276	1393448	.	-	0	Parent=Cnem001864-RA;ID=Cnem001864-RA:cds
scaffold_36687	maker	CDS	1391285	1391863	.	-	0	ID=Cnem001864-RA:cds_dup803;Parent=Cnem001864-RA
scaffold_36687	maker	CDS	1391874	1392079	.	-	2	ID=Cnem001864-RA:cds_dup802;Parent=Cnem001864-RA
scaffold_36687	maker	exon	1391874	1392079	.	-	.	Parent=Cnem001864-RA;ID=Cnem001864-RA:exon:55200
scaffold_36687	maker	exon	1392164	1392445	.	-	.	Parent=Cnem001864-RA;ID=Cnem001864-RA:exon:55201
scaffold_36687	maker	exon	1392480	1392996	.	-	.	Parent=Cnem001864-RA;ID=Cnem001864-RA:exon:55202
scaffold_36687	maker	exon	1393276	1393448	.	-	.	ID=Cnem001864-RA:exon:55204;Parent=Cnem001864-RA
scaffold_36687	maker	exon	1393063	1393237	.	-	.	Parent=Cnem001864-RA;ID=Cnem001864-RA:exon:55203
scaffold_36687	maker	exon	1391285	1391863	.	-	.	Parent=Cnem001864-RA;ID=Cnem001864-RA:exon:55199
ctg32668	maker	gene	8346	11597	.	-	.	Name=Cnem168474;ID=Cnem168474;Alias=snap-ctg32668-processed-gene-0.2
ctg32668	maker	mRNA	8346	11597	.	-	.	_AED=0.11;ID=Cnem168474-RA;Alias=snap-ctg32668-processed-gene-0.2-mRNA-1;_QI=0|0|0|0.33|1|1|3|0|112;_eAED=0.11;Name=Cnem168474-RA;Parent=Cnem168474
ctg32668	maker	exon	11195	11246	.	-	.	ID=Cnem168474-RA:exon:159574;Parent=Cnem168474-RA
ctg32668	maker	exon	8346	8611	.	-	.	ID=Cnem168474-RA:exon:159573;Parent=Cnem168474-RA
ctg32668	maker	exon	11577	11597	.	-	.	ID=Cnem168474-RA:exon:159575;Parent=Cnem168474-RA
ctg32668	maker	CDS	11577	11597	.	-	0	ID=Cnem168474-RA:cds;Parent=Cnem168474-RA
ctg32668	maker	CDS	8346	8611	.	-	2	ID=Cnem168474-RA:cds_dup813;Parent=Cnem168474-RA
ctg32668	maker	CDS	11195	11246	.	-	0	Parent=Cnem168474-RA;ID=Cnem168474-RA:cds_dup812
ctg2269	maker	gene	249520	262956	.	+	.	Name=Cnem102852;ID=Cnem102852;Alias=maker-ctg2269-augustus-gene-0.12
ctg2269	maker	mRNA	249520	262956	.	+	.	_eAED=0.09;Name=Cnem102852-RA;Parent=Cnem102852;_AED=0.09;Alias=maker-ctg2269-augustus-gene-0.12-mRNA-1;ID=Cnem102852-RA;_QI=296|1|1|1|0|0.4|5|539|97
ctg2269	maker	exon	249520	249802	.	+	.	Parent=Cnem102852-RA;ID=Cnem102852-RA:exon:315977
ctg2269	maker	exon	258327	258384	.	+	.	Parent=Cnem102852-RA;ID=Cnem102852-RA:exon:315980
ctg2269	maker	exon	262334	262956	.	+	.	Parent=Cnem102852-RA;ID=Cnem102852-RA:exon:315981
ctg2269	maker	exon	255445	255533	.	+	.	Parent=Cnem102852-RA;ID=Cnem102852-RA:exon:315979
ctg2269	maker	exon	253075	253150	.	+	.	ID=Cnem102852-RA:exon:315978;Parent=Cnem102852-RA
ctg2269	maker	CDS	253088	253150	.	+	0	Parent=Cnem102852-RA;ID=Cnem102852-RA:cds
ctg2269	maker	CDS	255445	255533	.	+	0	ID=Cnem102852-RA:cds_dup814;Parent=Cnem102852-RA
ctg2269	maker	CDS	258327	258384	.	+	1	ID=Cnem102852-RA:cds_dup815;Parent=Cnem102852-RA
ctg2269	maker	CDS	262334	262417	.	+	0	ID=Cnem102852-RA:cds_dup816;Parent=Cnem102852-RA
ctg2269	maker	gene	191058	223476	.	+	.	Name=Cnem102850;Alias=snap-ctg2269-processed-gene-0.44;ID=Cnem102850
ctg2269	maker	mRNA	191058	223476	.	+	.	_QI=0|0|0|0.84|1|1|13|0|825;_AED=0.12;ID=Cnem102850-RA;Alias=snap-ctg2269-processed-gene-0.44-mRNA-1;Parent=Cnem102850;_eAED=0.25;Name=Cnem102850-RA
ctg2269	maker	exon	213728	213835	.	+	.	ID=Cnem102850-RA:exon:315992;Parent=Cnem102850-RA
ctg2269	maker	exon	198161	198235	.	+	.	ID=Cnem102850-RA:exon:315986;Parent=Cnem102850-RA
ctg2269	maker	exon	191058	192062	.	+	.	ID=Cnem102850-RA:exon:315983;Parent=Cnem102850-RA
ctg2269	maker	exon	195020	195166	.	+	.	Parent=Cnem102850-RA;ID=Cnem102850-RA:exon:315985
ctg2269	maker	exon	205998	206093	.	+	.	ID=Cnem102850-RA:exon:315989;Parent=Cnem102850-RA
ctg2269	maker	exon	217470	217592	.	+	.	ID=Cnem102850-RA:exon:315993;Parent=Cnem102850-RA
ctg2269	maker	exon	219304	219564	.	+	.	Parent=Cnem102850-RA;ID=Cnem102850-RA:exon:315994
ctg2269	maker	exon	211127	211343	.	+	.	ID=Cnem102850-RA:exon:315991;Parent=Cnem102850-RA
ctg2269	maker	exon	223468	223476	.	+	.	Parent=Cnem102850-RA;ID=Cnem102850-RA:exon:315995
ctg2269	maker	exon	209138	209271	.	+	.	Parent=Cnem102850-RA;ID=Cnem102850-RA:exon:315990
ctg2269	maker	exon	202542	202644	.	+	.	ID=Cnem102850-RA:exon:315988;Parent=Cnem102850-RA
ctg2269	maker	exon	192635	192706	.	+	.	ID=Cnem102850-RA:exon:315984;Parent=Cnem102850-RA
ctg2269	maker	exon	200746	200873	.	+	.	ID=Cnem102850-RA:exon:315987;Parent=Cnem102850-RA
ctg2269	maker	CDS	205998	206093	.	+	0	Parent=Cnem102850-RA;ID=Cnem102850-RA:cds_dup822
ctg2269	maker	CDS	211127	211343	.	+	1	ID=Cnem102850-RA:cds_dup824;Parent=Cnem102850-RA
ctg2269	maker	CDS	202542	202644	.	+	1	ID=Cnem102850-RA:cds_dup821;Parent=Cnem102850-RA
ctg2269	maker	CDS	195020	195166	.	+	0	Parent=Cnem102850-RA;ID=Cnem102850-RA:cds_dup818
ctg2269	maker	CDS	217470	217592	.	+	0	ID=Cnem102850-RA:cds_dup826;Parent=Cnem102850-RA
ctg2269	maker	CDS	200746	200873	.	+	0	Parent=Cnem102850-RA;ID=Cnem102850-RA:cds_dup820
ctg2269	maker	CDS	223468	223476	.	+	0	ID=Cnem102850-RA:cds_dup828;Parent=Cnem102850-RA
ctg2269	maker	CDS	219304	219564	.	+	0	Parent=Cnem102850-RA;ID=Cnem102850-RA:cds_dup827
ctg2269	maker	CDS	209138	209271	.	+	0	Parent=Cnem102850-RA;ID=Cnem102850-RA:cds_dup823
ctg2269	maker	CDS	191058	192062	.	+	0	ID=Cnem102850-RA:cds;Parent=Cnem102850-RA
ctg2269	maker	CDS	213728	213835	.	+	0	ID=Cnem102850-RA:cds_dup825;Parent=Cnem102850-RA
ctg2269	maker	CDS	198161	198235	.	+	0	Parent=Cnem102850-RA;ID=Cnem102850-RA:cds_dup819
ctg2269	maker	CDS	192635	192706	.	+	0	Parent=Cnem102850-RA;ID=Cnem102850-RA:cds_dup817
ctg2269	maker	gene	34003	36937	.	+	.	ID=Cnem102843;Alias=maker-ctg2269-snap-gene-0.1;Name=Cnem102843
ctg2269	maker	mRNA	34003	36937	.	+	.	Alias=maker-ctg2269-snap-gene-0.1-mRNA-1;_AED=0.28;ID=Cnem102843-RA;_QI=0|0|0|1|0|0.5|2|0|973;Name=Cnem102843-RA;_eAED=0.87;Parent=Cnem102843
ctg2269	maker	exon	34429	36937	.	+	.	Parent=Cnem102843-RA;ID=Cnem102843-RA:exon:316007
ctg2269	maker	exon	34003	34415	.	+	.	ID=Cnem102843-RA:exon:316006;Parent=Cnem102843-RA
ctg2269	maker	CDS	34003	34415	.	+	0	ID=Cnem102843-RA:cds;Parent=Cnem102843-RA
ctg2269	maker	CDS	34429	36937	.	+	1	ID=Cnem102843-RA:cds_dup831;Parent=Cnem102843-RA
ctg2269	maker	gene	17484	26546	.	-	.	Name=Cnem102842;ID=Cnem102842;Alias=maker-ctg2269-snap-gene-0.6
ctg2269	maker	mRNA	17484	26546	.	-	.	_QI=61|1|1|1|1|1|8|0|388;_AED=0.00;ID=Cnem102842-RA;Alias=maker-ctg2269-snap-gene-0.6-mRNA-1;Parent=Cnem102842;Name=Cnem102842-RA;_eAED=0.00
ctg2269	maker	CDS	23744	23888	.	-	0	Parent=Cnem102842-RA;ID=Cnem102842-RA:cds_dup834
ctg2269	maker	CDS	19401	19525	.	-	1	Parent=Cnem102842-RA;ID=Cnem102842-RA:cds_dup837
ctg2269	maker	CDS	17484	17629	.	-	2	ID=Cnem102842-RA:cds_dup839;Parent=Cnem102842-RA
ctg2269	maker	CDS	23022	23146	.	-	2	ID=Cnem102842-RA:cds_dup835;Parent=Cnem102842-RA
ctg2269	maker	CDS	21070	21242	.	-	0	Parent=Cnem102842-RA;ID=Cnem102842-RA:cds_dup836
ctg2269	maker	CDS	26355	26485	.	-	0	Parent=Cnem102842-RA;ID=Cnem102842-RA:cds
ctg2269	maker	CDS	25405	25558	.	-	1	ID=Cnem102842-RA:cds_dup833;Parent=Cnem102842-RA
ctg2269	maker	CDS	18840	19004	.	-	2	Parent=Cnem102842-RA;ID=Cnem102842-RA:cds_dup838
ctg2269	maker	exon	19401	19525	.	-	.	Parent=Cnem102842-RA;ID=Cnem102842-RA:exon:316015
ctg2269	maker	exon	23744	23888	.	-	.	ID=Cnem102842-RA:exon:316012;Parent=Cnem102842-RA
ctg2269	maker	exon	26355	26546	.	-	.	ID=Cnem102842-RA:exon:316010;Parent=Cnem102842-RA
ctg2269	maker	exon	21070	21242	.	-	.	ID=Cnem102842-RA:exon:316014;Parent=Cnem102842-RA
ctg2269	maker	exon	17484	17629	.	-	.	ID=Cnem102842-RA:exon:316017;Parent=Cnem102842-RA
ctg2269	maker	exon	18840	19004	.	-	.	ID=Cnem102842-RA:exon:316016;Parent=Cnem102842-RA
ctg2269	maker	exon	25405	25558	.	-	.	ID=Cnem102842-RA:exon:316011;Parent=Cnem102842-RA
ctg2269	maker	exon	23022	23146	.	-	.	Parent=Cnem102842-RA;ID=Cnem102842-RA:exon:316013
ctg2269	maker	gene	38328	51440	.	-	.	ID=Cnem102844;Alias=maker-ctg2269-augustus-gene-0.14;Name=Cnem102844
ctg2269	maker	mRNA	38328	51440	.	-	.	ID=Cnem102844-RA;_AED=0.00;Alias=maker-ctg2269-augustus-gene-0.14-mRNA-1;_QI=475|1|1|1|1|1|6|0|84;_eAED=0.00;Name=Cnem102844-RA;Parent=Cnem102844
ctg2269	maker	CDS	44781	44864	.	-	0	ID=Cnem102844-RA:cds;Parent=Cnem102844-RA
ctg2269	maker	CDS	38328	38495	.	-	0	ID=Cnem102844-RA:cds_dup840;Parent=Cnem102844-RA
ctg2269	maker	exon	48282	48427	.	-	.	Parent=Cnem102844-RA;ID=Cnem102844-RA:exon:316020
ctg2269	maker	exon	51353	51440	.	-	.	ID=Cnem102844-RA:exon:316018;Parent=Cnem102844-RA
ctg2269	maker	exon	38328	38495	.	-	.	ID=Cnem102844-RA:exon:316023;Parent=Cnem102844-RA
ctg2269	maker	exon	44781	44884	.	-	.	Parent=Cnem102844-RA;ID=Cnem102844-RA:exon:316022
ctg2269	maker	exon	50482	50591	.	-	.	Parent=Cnem102844-RA;ID=Cnem102844-RA:exon:316019
ctg2269	maker	exon	47779	47889	.	-	.	Parent=Cnem102844-RA;ID=Cnem102844-RA:exon:316021
ctg2269	maker	gene	67540	79654	.	-	.	ID=Cnem102846;Alias=maker-ctg2269-snap-gene-0.8;Name=Cnem102846
ctg2269	maker	mRNA	67540	79654	.	-	.	_AED=0.23;ID=Cnem102846-RA;Alias=maker-ctg2269-snap-gene-0.8-mRNA-1;_QI=0|0.85|0.62|1|1|0.75|8|0|282;_eAED=0.23;Name=Cnem102846-RA;Parent=Cnem102846
ctg2269	maker	CDS	67540	67695	.	-	0	ID=Cnem102846-RA:cds_dup847;Parent=Cnem102846-RA
ctg2269	maker	CDS	78533	78614	.	-	1	ID=Cnem102846-RA:cds_dup841;Parent=Cnem102846-RA
ctg2269	maker	CDS	76066	76150	.	-	0	ID=Cnem102846-RA:cds_dup842;Parent=Cnem102846-RA
ctg2269	maker	CDS	68738	68812	.	-	0	ID=Cnem102846-RA:cds_dup846;Parent=Cnem102846-RA
ctg2269	maker	CDS	72954	73065	.	-	1	ID=Cnem102846-RA:cds_dup844;Parent=Cnem102846-RA
ctg2269	maker	CDS	73419	73536	.	-	2	Parent=Cnem102846-RA;ID=Cnem102846-RA:cds_dup843
ctg2269	maker	CDS	71889	71969	.	-	0	Parent=Cnem102846-RA;ID=Cnem102846-RA:cds_dup845
ctg2269	maker	CDS	79518	79654	.	-	0	Parent=Cnem102846-RA;ID=Cnem102846-RA:cds
ctg2269	maker	exon	79518	79654	.	-	.	Parent=Cnem102846-RA;ID=Cnem102846-RA:exon:316032
ctg2269	maker	exon	76066	76150	.	-	.	Parent=Cnem102846-RA;ID=Cnem102846-RA:exon:316030
ctg2269	maker	exon	68738	68812	.	-	.	Parent=Cnem102846-RA;ID=Cnem102846-RA:exon:316026
ctg2269	maker	exon	71889	71969	.	-	.	ID=Cnem102846-RA:exon:316027;Parent=Cnem102846-RA
ctg2269	maker	exon	72954	73065	.	-	.	Parent=Cnem102846-RA;ID=Cnem102846-RA:exon:316028
ctg2269	maker	exon	78533	78614	.	-	.	ID=Cnem102846-RA:exon:316031;Parent=Cnem102846-RA
ctg2269	maker	exon	67540	67695	.	-	.	ID=Cnem102846-RA:exon:316025;Parent=Cnem102846-RA
ctg2269	maker	exon	73419	73536	.	-	.	Parent=Cnem102846-RA;ID=Cnem102846-RA:exon:316029
ctg2269	maker	gene	61434	64743	.	+	.	ID=Cnem102845;Alias=maker-ctg2269-snap-gene-0.3;Name=Cnem102845
ctg2269	maker	mRNA	61434	64743	.	+	.	_eAED=0.45;Name=Cnem102845-RA;Parent=Cnem102845;_AED=0.46;ID=Cnem102845-RA;Alias=maker-ctg2269-snap-gene-0.3-mRNA-1;_QI=0|0|0|0.75|0|0|4|0|214
ctg2269	maker	CDS	64409	64561	.	+	1	ID=Cnem102845-RA:cds_dup850;Parent=Cnem102845-RA
ctg2269	maker	CDS	64221	64313	.	+	1	ID=Cnem102845-RA:cds_dup849;Parent=Cnem102845-RA
ctg2269	maker	CDS	61434	61654	.	+	0	ID=Cnem102845-RA:cds;Parent=Cnem102845-RA
ctg2269	maker	CDS	64566	64743	.	+	1	ID=Cnem102845-RA:cds_dup851;Parent=Cnem102845-RA
ctg2269	maker	exon	64566	64743	.	+	.	Parent=Cnem102845-RA;ID=Cnem102845-RA:exon:316051
ctg2269	maker	exon	61434	61654	.	+	.	ID=Cnem102845-RA:exon:316048;Parent=Cnem102845-RA
ctg2269	maker	exon	64409	64561	.	+	.	Parent=Cnem102845-RA;ID=Cnem102845-RA:exon:316050
ctg2269	maker	exon	64221	64313	.	+	.	ID=Cnem102845-RA:exon:316049;Parent=Cnem102845-RA
ctg34186	maker	gene	17092	19990	.	+	.	Name=Cnem169353;Alias=snap-ctg34186-processed-gene-0.3;ID=Cnem169353
ctg34186	maker	mRNA	17092	19990	.	+	.	Name=Cnem169353-RA;_eAED=0.16;Parent=Cnem169353;_AED=0.16;Alias=snap-ctg34186-processed-gene-0.3-mRNA-1;ID=Cnem169353-RA;_QI=0|0|0|1|1|1|2|0|294
ctg34186	maker	exon	17092	17499	.	+	.	Parent=Cnem169353-RA;ID=Cnem169353-RA:exon:455809
ctg34186	maker	exon	19517	19990	.	+	.	ID=Cnem169353-RA:exon:455810;Parent=Cnem169353-RA
ctg34186	maker	CDS	19517	19990	.	+	0	Parent=Cnem169353-RA;ID=Cnem169353-RA:cds_dup852
ctg34186	maker	CDS	17092	17499	.	+	0	Parent=Cnem169353-RA;ID=Cnem169353-RA:cds
ctg27693	maker	gene	16828	17235	.	+	.	ID=Cnem166126;Alias=snap-ctg27693-processed-gene-0.10;Name=Cnem166126
ctg27693	maker	mRNA	16828	17235	.	+	.	ID=Cnem166126-RA;_AED=0.44;Alias=snap-ctg27693-processed-gene-0.10-mRNA-1;_QI=0|-1|0|1|-1|1|1|0|135;_eAED=0.44;Name=Cnem166126-RA;Parent=Cnem166126
ctg27693	maker	CDS	16828	17235	.	+	0	ID=Cnem166126-RA:cds;Parent=Cnem166126-RA
ctg27693	maker	exon	16828	17235	.	+	.	Parent=Cnem166126-RA;ID=Cnem166126-RA:exon:163926
ctg4643	maker	gene	197783	231960	.	-	.	Name=Cnem107663;Alias=maker-ctg4643-snap-gene-0.18;ID=Cnem107663
ctg4643	maker	mRNA	197783	231960	.	-	.	_eAED=0.23;Name=Cnem107663-RA;Parent=Cnem107663;_AED=0.23;ID=Cnem107663-RA;Alias=maker-ctg4643-snap-gene-0.18-mRNA-1;_QI=137|0.85|0.87|1|0.57|0.5|8|443|545
ctg4643	maker	exon	215613	215737	.	-	.	ID=Cnem107663-RA:exon:639090;Parent=Cnem107663-RA
ctg4643	maker	exon	214917	215122	.	-	.	Parent=Cnem107663-RA;ID=Cnem107663-RA:exon:639091
ctg4643	maker	exon	219471	219599	.	-	.	ID=Cnem107663-RA:exon:639089;Parent=Cnem107663-RA
ctg4643	maker	exon	198827	198992	.	-	.	Parent=Cnem107663-RA;ID=Cnem107663-RA:exon:639093
ctg4643	maker	exon	226354	226548	.	-	.	ID=Cnem107663-RA:exon:639088;Parent=Cnem107663-RA
ctg4643	maker	exon	197783	198329	.	-	.	ID=Cnem107663-RA:exon:639094;Parent=Cnem107663-RA
ctg4643	maker	exon	231263	231960	.	-	.	Parent=Cnem107663-RA;ID=Cnem107663-RA:exon:639087
ctg4643	maker	exon	210083	210234	.	-	.	Parent=Cnem107663-RA;ID=Cnem107663-RA:exon:639092
ctg4643	maker	CDS	226354	226548	.	-	0	ID=Cnem107663-RA:cds_dup868;Parent=Cnem107663-RA
ctg4643	maker	CDS	219471	219599	.	-	0	ID=Cnem107663-RA:cds_dup869;Parent=Cnem107663-RA
ctg4643	maker	CDS	210083	210234	.	-	2	Parent=Cnem107663-RA;ID=Cnem107663-RA:cds_dup872
ctg4643	maker	CDS	198226	198329	.	-	2	Parent=Cnem107663-RA;ID=Cnem107663-RA:cds_dup874
ctg4643	maker	CDS	231263	231823	.	-	0	ID=Cnem107663-RA:cds;Parent=Cnem107663-RA
ctg4643	maker	CDS	215613	215737	.	-	0	ID=Cnem107663-RA:cds_dup870;Parent=Cnem107663-RA
ctg4643	maker	CDS	198827	198992	.	-	0	ID=Cnem107663-RA:cds_dup873;Parent=Cnem107663-RA
ctg4643	maker	CDS	214917	215122	.	-	1	Parent=Cnem107663-RA;ID=Cnem107663-RA:cds_dup871
ctg4643	maker	gene	154995	174860	.	-	.	Name=Cnem107659;ID=Cnem107659;Alias=maker-ctg4643-snap-gene-0.17
ctg4643	maker	mRNA	154995	174860	.	-	.	_QI=0|0.75|0.4|0.8|0|0.6|5|0|360;Alias=maker-ctg4643-snap-gene-0.17-mRNA-1;_AED=0.29;ID=Cnem107659-RA;Parent=Cnem107659;_eAED=0.29;Name=Cnem107659-RA
ctg4643	maker	exon	174503	174860	.	-	.	Parent=Cnem107659-RA;ID=Cnem107659-RA:exon:639100
ctg4643	maker	exon	172565	172690	.	-	.	Parent=Cnem107659-RA;ID=Cnem107659-RA:exon:639099
ctg4643	maker	exon	154995	155287	.	-	.	ID=Cnem107659-RA:exon:639096;Parent=Cnem107659-RA
ctg4643	maker	exon	163756	163933	.	-	.	ID=Cnem107659-RA:exon:639098;Parent=Cnem107659-RA
ctg4643	maker	exon	157346	157473	.	-	.	Parent=Cnem107659-RA;ID=Cnem107659-RA:exon:639097
ctg4643	maker	CDS	163756	163933	.	-	2	Parent=Cnem107659-RA;ID=Cnem107659-RA:cds_dup876
ctg4643	maker	CDS	157346	157473	.	-	1	ID=Cnem107659-RA:cds_dup877;Parent=Cnem107659-RA
ctg4643	maker	CDS	172565	172690	.	-	2	Parent=Cnem107659-RA;ID=Cnem107659-RA:cds_dup875
ctg4643	maker	CDS	154995	155287	.	-	2	Parent=Cnem107659-RA;ID=Cnem107659-RA:cds_dup878
ctg4643	maker	CDS	174503	174860	.	-	0	ID=Cnem107659-RA:cds;Parent=Cnem107659-RA
ctg4643	maker	gene	184903	193217	.	-	.	Alias=snap-ctg4643-processed-gene-0.105;ID=Cnem107662;Name=Cnem107662
ctg4643	maker	mRNA	184903	193217	.	-	.	_QI=0|0|0|0.5|1|1|2|0|364;_AED=0.48;ID=Cnem107662-RA;Alias=snap-ctg4643-processed-gene-0.105-mRNA-1;Parent=Cnem107662;Name=Cnem107662-RA;_eAED=0.31
ctg4643	maker	CDS	184903	185694	.	-	0	ID=Cnem107662-RA:cds_dup879;Parent=Cnem107662-RA
ctg4643	maker	CDS	192915	193217	.	-	0	Parent=Cnem107662-RA;ID=Cnem107662-RA:cds
ctg4643	maker	exon	184903	185694	.	-	.	ID=Cnem107662-RA:exon:639101;Parent=Cnem107662-RA
ctg4643	maker	exon	192915	193217	.	-	.	Parent=Cnem107662-RA;ID=Cnem107662-RA:exon:639102
ctg4643	maker	gene	133261	140943	.	-	.	Name=Cnem107657;ID=Cnem107657;Alias=maker-ctg4643-snap-gene-0.16
ctg4643	maker	mRNA	133261	140943	.	-	.	_AED=0.48;Alias=maker-ctg4643-snap-gene-0.16-mRNA-1;ID=Cnem107657-RA;_QI=0|0.25|0|0.4|0.5|0.6|5|0|260;Name=Cnem107657-RA;_eAED=0.48;Parent=Cnem107657
ctg4643	maker	CDS	133676	133823	.	-	1	Parent=Cnem107657-RA;ID=Cnem107657-RA:cds_dup882
ctg4643	maker	CDS	133261	133542	.	-	0	ID=Cnem107657-RA:cds_dup883;Parent=Cnem107657-RA
ctg4643	maker	CDS	138502	138654	.	-	0	ID=Cnem107657-RA:cds_dup880;Parent=Cnem107657-RA
ctg4643	maker	CDS	140776	140943	.	-	0	ID=Cnem107657-RA:cds;Parent=Cnem107657-RA
ctg4643	maker	CDS	136152	136183	.	-	0	Parent=Cnem107657-RA;ID=Cnem107657-RA:cds_dup881
ctg4643	maker	exon	140776	140943	.	-	.	Parent=Cnem107657-RA;ID=Cnem107657-RA:exon:639107
ctg4643	maker	exon	136152	136183	.	-	.	ID=Cnem107657-RA:exon:639105;Parent=Cnem107657-RA
ctg4643	maker	exon	133676	133823	.	-	.	ID=Cnem107657-RA:exon:639104;Parent=Cnem107657-RA
ctg4643	maker	exon	133261	133542	.	-	.	ID=Cnem107657-RA:exon:639103;Parent=Cnem107657-RA
ctg4643	maker	exon	138502	138654	.	-	.	ID=Cnem107657-RA:exon:639106;Parent=Cnem107657-RA
ctg4643	maker	gene	111136	122477	.	-	.	Alias=snap-ctg4643-processed-gene-0.93;ID=Cnem107656;Name=Cnem107656
ctg4643	maker	mRNA	111136	122477	.	-	.	Name=Cnem107656-RA;_eAED=0.79;Parent=Cnem107656;_AED=0.20;Alias=snap-ctg4643-processed-gene-0.93-mRNA-1;ID=Cnem107656-RA;_QI=0|0|0|0.37|1|1|8|0|539
ctg4643	maker	exon	118200	118306	.	-	.	Parent=Cnem107656-RA;ID=Cnem107656-RA:exon:639115
ctg4643	maker	exon	117306	117496	.	-	.	Parent=Cnem107656-RA;ID=Cnem107656-RA:exon:639114
ctg4643	maker	exon	122315	122477	.	-	.	ID=Cnem107656-RA:exon:639118;Parent=Cnem107656-RA
ctg4643	maker	exon	119622	119653	.	-	.	ID=Cnem107656-RA:exon:639116;Parent=Cnem107656-RA
ctg4643	maker	exon	111350	111955	.	-	.	ID=Cnem107656-RA:exon:639112;Parent=Cnem107656-RA
ctg4643	maker	exon	111136	111255	.	-	.	Parent=Cnem107656-RA;ID=Cnem107656-RA:exon:639111
ctg4643	maker	exon	114410	114695	.	-	.	ID=Cnem107656-RA:exon:639113;Parent=Cnem107656-RA
ctg4643	maker	exon	120856	120970	.	-	.	Parent=Cnem107656-RA;ID=Cnem107656-RA:exon:639117
ctg4643	maker	CDS	119622	119653	.	-	1	Parent=Cnem107656-RA;ID=Cnem107656-RA:cds_dup885
ctg4643	maker	CDS	117306	117496	.	-	0	Parent=Cnem107656-RA;ID=Cnem107656-RA:cds_dup887
ctg4643	maker	CDS	111350	111955	.	-	0	ID=Cnem107656-RA:cds_dup889;Parent=Cnem107656-RA
ctg4643	maker	CDS	122315	122477	.	-	0	ID=Cnem107656-RA:cds;Parent=Cnem107656-RA
ctg4643	maker	CDS	111136	111255	.	-	0	Parent=Cnem107656-RA;ID=Cnem107656-RA:cds_dup890
ctg4643	maker	CDS	114410	114695	.	-	1	ID=Cnem107656-RA:cds_dup888;Parent=Cnem107656-RA
ctg4643	maker	CDS	118200	118306	.	-	2	Parent=Cnem107656-RA;ID=Cnem107656-RA:cds_dup886
ctg4643	maker	CDS	120856	120970	.	-	2	Parent=Cnem107656-RA;ID=Cnem107656-RA:cds_dup884
ctg4643	maker	gene	22130	22721	.	+	.	Name=Cnem107649;ID=Cnem107649;Alias=maker-ctg4643-snap-gene-0.2
ctg4643	maker	mRNA	22130	22721	.	+	.	_QI=0|0|0|1|0|0|4|0|171;_AED=0.41;ID=Cnem107649-RA;Alias=maker-ctg4643-snap-gene-0.2-mRNA-1;Parent=Cnem107649;Name=Cnem107649-RA;_eAED=0.41
ctg4643	maker	CDS	22459	22578	.	+	1	Parent=Cnem107649-RA;ID=Cnem107649-RA:cds_dup894
ctg4643	maker	CDS	22598	22721	.	+	1	Parent=Cnem107649-RA;ID=Cnem107649-RA:cds_dup895
ctg4643	maker	CDS	22130	22217	.	+	0	ID=Cnem107649-RA:cds;Parent=Cnem107649-RA
ctg4643	maker	CDS	22247	22430	.	+	2	ID=Cnem107649-RA:cds_dup893;Parent=Cnem107649-RA
ctg4643	maker	exon	22130	22217	.	+	.	ID=Cnem107649-RA:exon:639122;Parent=Cnem107649-RA
ctg4643	maker	exon	22459	22578	.	+	.	ID=Cnem107649-RA:exon:639124;Parent=Cnem107649-RA
ctg4643	maker	exon	22247	22430	.	+	.	ID=Cnem107649-RA:exon:639123;Parent=Cnem107649-RA
ctg4643	maker	exon	22598	22721	.	+	.	ID=Cnem107649-RA:exon:639125;Parent=Cnem107649-RA
ctg4643	maker	gene	78977	79524	.	+	.	Name=Cnem107655;Alias=maker-ctg4643-snap-gene-0.6;ID=Cnem107655
ctg4643	maker	mRNA	78977	79524	.	+	.	Parent=Cnem107655;_eAED=0.47;Name=Cnem107655-RA;_QI=0|0|0|1|0|0|2|0|120;ID=Cnem107655-RA;_AED=0.37;Alias=maker-ctg4643-snap-gene-0.6-mRNA-1
ctg4643	maker	exon	78977	79265	.	+	.	Parent=Cnem107655-RA;ID=Cnem107655-RA:exon:639128
ctg4643	maker	exon	79454	79524	.	+	.	ID=Cnem107655-RA:exon:639129;Parent=Cnem107655-RA
ctg4643	maker	CDS	78977	79265	.	+	0	ID=Cnem107655-RA:cds;Parent=Cnem107655-RA
ctg4643	maker	CDS	79454	79524	.	+	2	ID=Cnem107655-RA:cds_dup897;Parent=Cnem107655-RA
ctg3575	maker	gene	94171	96380	.	+	.	ID=Cnem045447;Alias=augustus-ctg3575-processed-gene-0.26;Name=Cnem045447
ctg3575	maker	mRNA	94171	96380	.	+	.	Parent=Cnem045447;_eAED=-0.11;Name=Cnem045447-RA;_QI=0|0|0|0.25|1|1|4|0|132;ID=Cnem045447-RA;_AED=0.45;Alias=augustus-ctg3575-processed-gene-0.26-mRNA-1
ctg3575	maker	exon	94171	94199	.	+	.	Parent=Cnem045447-RA;ID=Cnem045447-RA:exon:676388
ctg3575	maker	exon	94510	94601	.	+	.	Parent=Cnem045447-RA;ID=Cnem045447-RA:exon:676389
ctg3575	maker	exon	95920	96056	.	+	.	ID=Cnem045447-RA:exon:676390;Parent=Cnem045447-RA
ctg3575	maker	exon	96240	96380	.	+	.	ID=Cnem045447-RA:exon:676391;Parent=Cnem045447-RA
ctg3575	maker	CDS	94171	94199	.	+	0	ID=Cnem045447-RA:cds;Parent=Cnem045447-RA
ctg3575	maker	CDS	95920	96056	.	+	2	ID=Cnem045447-RA:cds_dup901;Parent=Cnem045447-RA
ctg3575	maker	CDS	94510	94601	.	+	1	Parent=Cnem045447-RA;ID=Cnem045447-RA:cds_dup900
ctg3575	maker	CDS	96240	96380	.	+	0	ID=Cnem045447-RA:cds_dup902;Parent=Cnem045447-RA
ctg3575	maker	gene	319104	321179	.	+	.	Name=Cnem045461;Alias=augustus-ctg3575-processed-gene-0.45;ID=Cnem045461
ctg3575	maker	mRNA	319104	321179	.	+	.	Parent=Cnem045461;Name=Cnem045461-RA;_eAED=0.01;_QI=0|0|0|1|1|1|3|0|629;_AED=0.31;ID=Cnem045461-RA;Alias=augustus-ctg3575-processed-gene-0.45-mRNA-1
ctg3575	maker	CDS	319104	319923	.	+	0	ID=Cnem045461-RA:cds;Parent=Cnem045461-RA
ctg3575	maker	CDS	319998	320135	.	+	2	Parent=Cnem045461-RA;ID=Cnem045461-RA:cds_dup903
ctg3575	maker	CDS	320248	321179	.	+	2	Parent=Cnem045461-RA;ID=Cnem045461-RA:cds_dup904
ctg3575	maker	exon	320248	321179	.	+	.	Parent=Cnem045461-RA;ID=Cnem045461-RA:exon:676394
ctg3575	maker	exon	319104	319923	.	+	.	ID=Cnem045461-RA:exon:676392;Parent=Cnem045461-RA
ctg3575	maker	exon	319998	320135	.	+	.	ID=Cnem045461-RA:exon:676393;Parent=Cnem045461-RA
ctg3575	maker	gene	59215	66344	.	+	.	Name=Cnem045444;ID=Cnem045444;Alias=maker-ctg3575-augustus-gene-0.0
ctg3575	maker	mRNA	59215	66344	.	+	.	_AED=0.46;Alias=maker-ctg3575-augustus-gene-0.0-mRNA-1;ID=Cnem045444-RA;_QI=0|0|0|0.75|1|1|4|0|538;_eAED=0.27;Name=Cnem045444-RA;Parent=Cnem045444
ctg3575	maker	exon	66173	66344	.	+	.	ID=Cnem045444-RA:exon:676407;Parent=Cnem045444-RA
ctg3575	maker	exon	65359	66026	.	+	.	Parent=Cnem045444-RA;ID=Cnem045444-RA:exon:676406
ctg3575	maker	exon	64277	64982	.	+	.	Parent=Cnem045444-RA;ID=Cnem045444-RA:exon:676405
ctg3575	maker	exon	59215	59285	.	+	.	Parent=Cnem045444-RA;ID=Cnem045444-RA:exon:676404
ctg3575	maker	CDS	66173	66344	.	+	1	Parent=Cnem045444-RA;ID=Cnem045444-RA:cds_dup909
ctg3575	maker	CDS	65359	66026	.	+	0	Parent=Cnem045444-RA;ID=Cnem045444-RA:cds_dup908
ctg3575	maker	CDS	64277	64982	.	+	1	Parent=Cnem045444-RA;ID=Cnem045444-RA:cds_dup907
ctg3575	maker	CDS	59215	59285	.	+	0	ID=Cnem045444-RA:cds;Parent=Cnem045444-RA
ctg3575	maker	gene	33844	37218	.	+	.	Name=Cnem045443;Alias=snap-ctg3575-processed-gene-0.125;ID=Cnem045443
ctg3575	maker	mRNA	33844	37218	.	+	.	Alias=snap-ctg3575-processed-gene-0.125-mRNA-1;_AED=0.45;ID=Cnem045443-RA;_QI=0|0|0|0.33|1|1|3|0|334;Name=Cnem045443-RA;_eAED=0.45;Parent=Cnem045443
ctg3575	maker	CDS	33844	34148	.	+	0	Parent=Cnem045443-RA;ID=Cnem045443-RA:cds
ctg3575	maker	CDS	34794	34936	.	+	1	Parent=Cnem045443-RA;ID=Cnem045443-RA:cds_dup912
ctg3575	maker	CDS	36662	37218	.	+	2	ID=Cnem045443-RA:cds_dup913;Parent=Cnem045443-RA
ctg3575	maker	exon	36662	37218	.	+	.	ID=Cnem045443-RA:exon:676419;Parent=Cnem045443-RA
ctg3575	maker	exon	33844	34148	.	+	.	ID=Cnem045443-RA:exon:676417;Parent=Cnem045443-RA
ctg3575	maker	exon	34794	34936	.	+	.	Parent=Cnem045443-RA;ID=Cnem045443-RA:exon:676418
ctg3575	maker	gene	139492	149088	.	-	.	Name=Cnem045452;ID=Cnem045452;Alias=snap-ctg3575-processed-gene-0.213
ctg3575	maker	mRNA	139492	149088	.	-	.	_AED=0.32;ID=Cnem045452-RA;Alias=snap-ctg3575-processed-gene-0.213-mRNA-1;_QI=0|0|0|0.6|1|1|5|0|492;Name=Cnem045452-RA;_eAED=0.74;Parent=Cnem045452
ctg3575	maker	exon	148361	149088	.	-	.	Parent=Cnem045452-RA;ID=Cnem045452-RA:exon:676481
ctg3575	maker	exon	139492	139789	.	-	.	Parent=Cnem045452-RA;ID=Cnem045452-RA:exon:676477
ctg3575	maker	exon	147776	147945	.	-	.	Parent=Cnem045452-RA;ID=Cnem045452-RA:exon:676480
ctg3575	maker	exon	144008	144273	.	-	.	Parent=Cnem045452-RA;ID=Cnem045452-RA:exon:676479
ctg3575	maker	exon	140912	140928	.	-	.	Parent=Cnem045452-RA;ID=Cnem045452-RA:exon:676478
ctg3575	maker	CDS	148361	149088	.	-	0	ID=Cnem045452-RA:cds;Parent=Cnem045452-RA
ctg3575	maker	CDS	147776	147945	.	-	1	Parent=Cnem045452-RA;ID=Cnem045452-RA:cds_dup926
ctg3575	maker	CDS	139492	139789	.	-	1	Parent=Cnem045452-RA;ID=Cnem045452-RA:cds_dup929
ctg3575	maker	CDS	140912	140928	.	-	0	Parent=Cnem045452-RA;ID=Cnem045452-RA:cds_dup928
ctg3575	maker	CDS	144008	144273	.	-	2	Parent=Cnem045452-RA;ID=Cnem045452-RA:cds_dup927
ctg3575	maker	gene	323648	324992	.	-	.	Name=Cnem045463;Alias=maker-ctg3575-snap-gene-0.333;ID=Cnem045463
ctg3575	maker	mRNA	323648	324992	.	-	.	Parent=Cnem045463;_eAED=0.80;Name=Cnem045463-RA;_QI=0|0|0|1|0.5|0.33|3|0|231;Alias=maker-ctg3575-snap-gene-0.333-mRNA-1;_AED=0.45;ID=Cnem045463-RA
ctg3575	maker	exon	323648	323825	.	-	.	Parent=Cnem045463-RA;ID=Cnem045463-RA:exon:676492
ctg3575	maker	exon	324305	324636	.	-	.	ID=Cnem045463-RA:exon:676493;Parent=Cnem045463-RA
ctg3575	maker	exon	324807	324992	.	-	.	ID=Cnem045463-RA:exon:676494;Parent=Cnem045463-RA
ctg3575	maker	CDS	324807	324992	.	-	0	Parent=Cnem045463-RA;ID=Cnem045463-RA:cds
ctg3575	maker	CDS	324305	324636	.	-	0	Parent=Cnem045463-RA;ID=Cnem045463-RA:cds_dup930
ctg3575	maker	CDS	323648	323825	.	-	1	ID=Cnem045463-RA:cds_dup931;Parent=Cnem045463-RA
ctg3575	maker	gene	450600	451605	.	-	.	Name=Cnem045469;ID=Cnem045469;Alias=maker-ctg3575-snap-gene-0.345
ctg3575	maker	mRNA	450600	451605	.	-	.	_eAED=0.86;Name=Cnem045469-RA;Parent=Cnem045469;ID=Cnem045469-RA;_AED=0.44;Alias=maker-ctg3575-snap-gene-0.345-mRNA-1;_QI=0|0|0|1|0|0.5|4|0|294
ctg3575	maker	exon	450884	451039	.	-	.	Parent=Cnem045469-RA;ID=Cnem045469-RA:exon:676498
ctg3575	maker	exon	451323	451605	.	-	.	Parent=Cnem045469-RA;ID=Cnem045469-RA:exon:676500
ctg3575	maker	exon	450600	450821	.	-	.	Parent=Cnem045469-RA;ID=Cnem045469-RA:exon:676497
ctg3575	maker	exon	451068	451291	.	-	.	Parent=Cnem045469-RA;ID=Cnem045469-RA:exon:676499
ctg3575	maker	CDS	450884	451039	.	-	0	Parent=Cnem045469-RA;ID=Cnem045469-RA:cds_dup933
ctg3575	maker	CDS	450600	450821	.	-	0	ID=Cnem045469-RA:cds_dup934;Parent=Cnem045469-RA
ctg3575	maker	CDS	451323	451605	.	-	0	ID=Cnem045469-RA:cds;Parent=Cnem045469-RA
ctg3575	maker	CDS	451068	451291	.	-	2	ID=Cnem045469-RA:cds_dup932;Parent=Cnem045469-RA
ctg3575	maker	gene	439000	440560	.	-	.	Name=Cnem045467;ID=Cnem045467;Alias=maker-ctg3575-snap-gene-0.343
ctg3575	maker	mRNA	439000	440560	.	-	.	_eAED=0.75;Name=Cnem045467-RA;Parent=Cnem045467;Alias=maker-ctg3575-snap-gene-0.343-mRNA-1;_AED=0.36;ID=Cnem045467-RA;_QI=0|0|0|1|0|0|3|0|496
ctg3575	maker	exon	440069	440560	.	-	.	ID=Cnem045467-RA:exon:676508;Parent=Cnem045467-RA
ctg3575	maker	exon	439000	439964	.	-	.	ID=Cnem045467-RA:exon:676506;Parent=Cnem045467-RA
ctg3575	maker	exon	440030	440063	.	-	.	ID=Cnem045467-RA:exon:676507;Parent=Cnem045467-RA
ctg3575	maker	CDS	440030	440063	.	-	0	Parent=Cnem045467-RA;ID=Cnem045467-RA:cds_dup936
ctg3575	maker	CDS	440069	440560	.	-	0	Parent=Cnem045467-RA;ID=Cnem045467-RA:cds
ctg3575	maker	CDS	439000	439964	.	-	2	ID=Cnem045467-RA:cds_dup937;Parent=Cnem045467-RA
ctg3575	maker	gene	313510	314003	.	-	.	Name=Cnem045460;ID=Cnem045460;Alias=maker-ctg3575-snap-gene-0.330
ctg3575	maker	mRNA	313510	314003	.	-	.	_QI=0|0|0|1|0|0|2|0|158;Alias=maker-ctg3575-snap-gene-0.330-mRNA-1;_AED=0.26;ID=Cnem045460-RA;Parent=Cnem045460;_eAED=0.15;Name=Cnem045460-RA
ctg3575	maker	exon	313771	314003	.	-	.	ID=Cnem045460-RA:exon:676525;Parent=Cnem045460-RA
ctg3575	maker	exon	313510	313750	.	-	.	ID=Cnem045460-RA:exon:676524;Parent=Cnem045460-RA
ctg3575	maker	CDS	313510	313750	.	-	1	Parent=Cnem045460-RA;ID=Cnem045460-RA:cds_dup942
ctg3575	maker	CDS	313771	314003	.	-	0	ID=Cnem045460-RA:cds;Parent=Cnem045460-RA
ctg9711	maker	gene	147786	156407	.	+	.	Name=Cnem125826;Alias=snap-ctg9711-processed-gene-0.37;ID=Cnem125826
ctg9711	maker	mRNA	147786	156407	.	+	.	_eAED=0.48;Name=Cnem125826-RA;Parent=Cnem125826;_AED=0.48;ID=Cnem125826-RA;Alias=snap-ctg9711-processed-gene-0.37-mRNA-1;_QI=0|0|0|0.2|1|1|5|0|539
ctg9711	maker	exon	149889	150514	.	+	.	ID=Cnem125826-RA:exon:265313;Parent=Cnem125826-RA
ctg9711	maker	exon	156189	156407	.	+	.	Parent=Cnem125826-RA;ID=Cnem125826-RA:exon:265316
ctg9711	maker	exon	147786	147995	.	+	.	Parent=Cnem125826-RA;ID=Cnem125826-RA:exon:265312
ctg9711	maker	exon	153234	153624	.	+	.	Parent=Cnem125826-RA;ID=Cnem125826-RA:exon:265314
ctg9711	maker	exon	154207	154380	.	+	.	Parent=Cnem125826-RA;ID=Cnem125826-RA:exon:265315
ctg9711	maker	CDS	149889	150514	.	+	0	Parent=Cnem125826-RA;ID=Cnem125826-RA:cds_dup953
ctg9711	maker	CDS	147786	147995	.	+	0	Parent=Cnem125826-RA;ID=Cnem125826-RA:cds
ctg9711	maker	CDS	153234	153624	.	+	1	ID=Cnem125826-RA:cds_dup954;Parent=Cnem125826-RA
ctg9711	maker	CDS	154207	154380	.	+	0	ID=Cnem125826-RA:cds_dup955;Parent=Cnem125826-RA
ctg9711	maker	CDS	156189	156407	.	+	0	ID=Cnem125826-RA:cds_dup956;Parent=Cnem125826-RA
ctg9711	maker	gene	50229	52990	.	-	.	ID=Cnem125817;Alias=snap-ctg9711-processed-gene-0.48;Name=Cnem125817
ctg9711	maker	mRNA	50229	52990	.	-	.	_AED=0.31;ID=Cnem125817-RA;Alias=snap-ctg9711-processed-gene-0.48-mRNA-1;_QI=0|0|0|1|1|1|4|0|761;_eAED=0.03;Name=Cnem125817-RA;Parent=Cnem125817
ctg9711	maker	CDS	50229	50669	.	-	0	ID=Cnem125817-RA:cds_dup959;Parent=Cnem125817-RA
ctg9711	maker	CDS	50837	51457	.	-	0	Parent=Cnem125817-RA;ID=Cnem125817-RA:cds_dup958
ctg9711	maker	CDS	51944	52990	.	-	0	ID=Cnem125817-RA:cds;Parent=Cnem125817-RA
ctg9711	maker	CDS	51535	51711	.	-	0	Parent=Cnem125817-RA;ID=Cnem125817-RA:cds_dup957
ctg9711	maker	exon	51944	52990	.	-	.	Parent=Cnem125817-RA;ID=Cnem125817-RA:exon:265324
ctg9711	maker	exon	50229	50669	.	-	.	ID=Cnem125817-RA:exon:265321;Parent=Cnem125817-RA
ctg9711	maker	exon	50837	51457	.	-	.	ID=Cnem125817-RA:exon:265322;Parent=Cnem125817-RA
ctg9711	maker	exon	51535	51711	.	-	.	Parent=Cnem125817-RA;ID=Cnem125817-RA:exon:265323
ctg9711	maker	gene	97959	98600	.	-	.	Name=Cnem125820;ID=Cnem125820;Alias=maker-ctg9711-snap-gene-0.17
ctg9711	maker	mRNA	97959	98600	.	-	.	_eAED=0.31;Name=Cnem125820-RA;Parent=Cnem125820;ID=Cnem125820-RA;_AED=0.06;Alias=maker-ctg9711-snap-gene-0.17-mRNA-1;_QI=0|0|0|1|0|0.33|3|0|197
ctg9711	maker	CDS	98190	98382	.	-	2	Parent=Cnem125820-RA;ID=Cnem125820-RA:cds_dup966
ctg9711	maker	CDS	98402	98600	.	-	0	Parent=Cnem125820-RA;ID=Cnem125820-RA:cds
ctg9711	maker	CDS	97959	98160	.	-	1	ID=Cnem125820-RA:cds_dup967;Parent=Cnem125820-RA
ctg9711	maker	exon	98190	98382	.	-	.	Parent=Cnem125820-RA;ID=Cnem125820-RA:exon:265333
ctg9711	maker	exon	98402	98600	.	-	.	Parent=Cnem125820-RA;ID=Cnem125820-RA:exon:265334
ctg9711	maker	exon	97959	98160	.	-	.	ID=Cnem125820-RA:exon:265332;Parent=Cnem125820-RA
ctg9711	maker	gene	77576	78495	.	-	.	Alias=maker-ctg9711-snap-gene-0.15;ID=Cnem125818;Name=Cnem125818
ctg9711	maker	mRNA	77576	78495	.	-	.	_AED=0.28;ID=Cnem125818-RA;Alias=maker-ctg9711-snap-gene-0.15-mRNA-1;_QI=0|0|0|1|0|0|4|0|269;_eAED=0.48;Name=Cnem125818-RA;Parent=Cnem125818
ctg9711	maker	CDS	77847	78060	.	-	0	ID=Cnem125818-RA:cds_dup971;Parent=Cnem125818-RA
ctg9711	maker	CDS	78374	78495	.	-	0	ID=Cnem125818-RA:cds;Parent=Cnem125818-RA
ctg9711	maker	CDS	78106	78340	.	-	1	Parent=Cnem125818-RA;ID=Cnem125818-RA:cds_dup970
ctg9711	maker	CDS	77576	77814	.	-	2	Parent=Cnem125818-RA;ID=Cnem125818-RA:cds_dup972
ctg9711	maker	exon	77576	77814	.	-	.	Parent=Cnem125818-RA;ID=Cnem125818-RA:exon:265343
ctg9711	maker	exon	78106	78340	.	-	.	ID=Cnem125818-RA:exon:265345;Parent=Cnem125818-RA
ctg9711	maker	exon	78374	78495	.	-	.	Parent=Cnem125818-RA;ID=Cnem125818-RA:exon:265346
ctg9711	maker	exon	77847	78060	.	-	.	Parent=Cnem125818-RA;ID=Cnem125818-RA:exon:265344
ctg9711	maker	gene	80938	81657	.	+	.	Name=Cnem125819;Alias=maker-ctg9711-snap-gene-0.4;ID=Cnem125819
ctg9711	maker	mRNA	80938	81657	.	+	.	_eAED=0.75;Name=Cnem125819-RA;Parent=Cnem125819;_AED=0.41;ID=Cnem125819-RA;Alias=maker-ctg9711-snap-gene-0.4-mRNA-1;_QI=0|0|0|1|0|0|3|0|216
ctg9711	maker	CDS	81364	81657	.	+	0	Parent=Cnem125819-RA;ID=Cnem125819-RA:cds_dup975
ctg9711	maker	CDS	80938	81020	.	+	0	Parent=Cnem125819-RA;ID=Cnem125819-RA:cds
ctg9711	maker	CDS	81073	81346	.	+	1	ID=Cnem125819-RA:cds_dup974;Parent=Cnem125819-RA
ctg9711	maker	exon	80938	81020	.	+	.	ID=Cnem125819-RA:exon:265353;Parent=Cnem125819-RA
ctg9711	maker	exon	81073	81346	.	+	.	Parent=Cnem125819-RA;ID=Cnem125819-RA:exon:265354
ctg9711	maker	exon	81364	81657	.	+	.	Parent=Cnem125819-RA;ID=Cnem125819-RA:exon:265355
ctg15181	maker	gene	27150	36403	.	+	.	ID=Cnem156070;Alias=maker-ctg15181-snap-gene-0.1;Name=Cnem156070
ctg15181	maker	mRNA	27150	36403	.	+	.	_QI=0|0.5|0.66|0.66|0|0.33|3|103|136;Alias=maker-ctg15181-snap-gene-0.1-mRNA-1;_AED=0.02;ID=Cnem156070-RA;Parent=Cnem156070;Name=Cnem156070-RA;_eAED=0.02
ctg15181	maker	CDS	36029	36300	.	+	2	ID=Cnem156070-RA:cds_dup985;Parent=Cnem156070-RA
ctg15181	maker	CDS	27535	27649	.	+	0	Parent=Cnem156070-RA;ID=Cnem156070-RA:cds_dup984
ctg15181	maker	CDS	27150	27173	.	+	0	Parent=Cnem156070-RA;ID=Cnem156070-RA:cds
ctg15181	maker	exon	27535	27649	.	+	.	Parent=Cnem156070-RA;ID=Cnem156070-RA:exon:124202
ctg15181	maker	exon	27150	27173	.	+	.	Parent=Cnem156070-RA;ID=Cnem156070-RA:exon:124201
ctg15181	maker	exon	36029	36403	.	+	.	ID=Cnem156070-RA:exon:124203;Parent=Cnem156070-RA
ctg15181	maker	gene	13511	24866	.	+	.	Name=Cnem156068;ID=Cnem156068;Alias=maker-ctg15181-snap-gene-0.0
ctg15181	maker	mRNA	13511	24866	.	+	.	Parent=Cnem156068;Name=Cnem156068-RA;_eAED=0.36;_QI=15|0.75|0.6|0.8|0.25|0.2|5|0|270;_AED=0.36;Alias=maker-ctg15181-snap-gene-0.0-mRNA-1;ID=Cnem156068-RA
ctg15181	maker	CDS	15634	15788	.	+	1	ID=Cnem156068-RA:cds_dup986;Parent=Cnem156068-RA
ctg15181	maker	CDS	24613	24866	.	+	2	Parent=Cnem156068-RA;ID=Cnem156068-RA:cds_dup989
ctg15181	maker	CDS	17716	17803	.	+	2	Parent=Cnem156068-RA;ID=Cnem156068-RA:cds_dup987
ctg15181	maker	CDS	24349	24503	.	+	1	ID=Cnem156068-RA:cds_dup988;Parent=Cnem156068-RA
ctg15181	maker	CDS	13526	13686	.	+	0	ID=Cnem156068-RA:cds;Parent=Cnem156068-RA
ctg15181	maker	exon	13511	13686	.	+	.	ID=Cnem156068-RA:exon:124204;Parent=Cnem156068-RA
ctg15181	maker	exon	24613	24866	.	+	.	ID=Cnem156068-RA:exon:124208;Parent=Cnem156068-RA
ctg15181	maker	exon	17716	17803	.	+	.	ID=Cnem156068-RA:exon:124206;Parent=Cnem156068-RA
ctg15181	maker	exon	24349	24503	.	+	.	ID=Cnem156068-RA:exon:124207;Parent=Cnem156068-RA
ctg15181	maker	exon	15634	15788	.	+	.	Parent=Cnem156068-RA;ID=Cnem156068-RA:exon:124205
ctg15181	maker	gene	6645	9303	.	-	.	Alias=augustus-ctg15181-processed-gene-0.5;ID=Cnem156067;Name=Cnem156067
ctg15181	maker	mRNA	6645	9303	.	-	.	Name=Cnem156067-RA;_eAED=0.12;Parent=Cnem156067;ID=Cnem156067-RA;_AED=0.45;Alias=augustus-ctg15181-processed-gene-0.5-mRNA-1;_QI=0|0|0|0.5|1|1|2|0|568
ctg15181	maker	CDS	7719	9303	.	-	0	Parent=Cnem156067-RA;ID=Cnem156067-RA:cds
ctg15181	maker	CDS	6645	6763	.	-	2	Parent=Cnem156067-RA;ID=Cnem156067-RA:cds_dup990
ctg15181	maker	exon	6645	6763	.	-	.	ID=Cnem156067-RA:exon:124210;Parent=Cnem156067-RA
ctg15181	maker	exon	7719	9303	.	-	.	Parent=Cnem156067-RA;ID=Cnem156067-RA:exon:124211
ctg40	maker	gene	182190	196044	.	+	.	ID=Cnem034413;Alias=augustus-ctg40-processed-gene-0.87;Name=Cnem034413
ctg40	maker	mRNA	182190	196044	.	+	.	Parent=Cnem034413;_eAED=0.23;Name=Cnem034413-RA;_QI=178|1|0.75|1|0.33|0.5|4|0|317;ID=Cnem034413-RA;_AED=0.19;Alias=augustus-ctg40-processed-gene-0.87-mRNA-1
ctg40	maker	exon	193072	193317	.	+	.	Parent=Cnem034413-RA;ID=Cnem034413-RA:exon:642539
ctg40	maker	exon	189819	189920	.	+	.	ID=Cnem034413-RA:exon:642538;Parent=Cnem034413-RA
ctg40	maker	exon	182190	182419	.	+	.	ID=Cnem034413-RA:exon:642537;Parent=Cnem034413-RA
ctg40	maker	exon	195491	196044	.	+	.	ID=Cnem034413-RA:exon:642540;Parent=Cnem034413-RA
ctg40	maker	CDS	193072	193317	.	+	2	Parent=Cnem034413-RA;ID=Cnem034413-RA:cds_dup994
ctg40	maker	CDS	195491	196044	.	+	2	ID=Cnem034413-RA:cds_dup995;Parent=Cnem034413-RA
ctg40	maker	CDS	182368	182419	.	+	0	ID=Cnem034413-RA:cds;Parent=Cnem034413-RA
ctg40	maker	CDS	189819	189920	.	+	2	ID=Cnem034413-RA:cds_dup993;Parent=Cnem034413-RA
ctg40	maker	gene	243197	250535	.	+	.	Alias=snap-ctg40-processed-gene-0.50;ID=Cnem034415;Name=Cnem034415
ctg40	maker	mRNA	243197	250535	.	+	.	_AED=0.29;Alias=snap-ctg40-processed-gene-0.50-mRNA-1;ID=Cnem034415-RA;_QI=0|0|0|0.25|1|1|4|0|169;Name=Cnem034415-RA;_eAED=0.28;Parent=Cnem034415
ctg40	maker	CDS	243197	243344	.	+	0	ID=Cnem034415-RA:cds;Parent=Cnem034415-RA
ctg40	maker	CDS	245160	245233	.	+	2	Parent=Cnem034415-RA;ID=Cnem034415-RA:cds_dup996
ctg40	maker	CDS	246892	246923	.	+	0	Parent=Cnem034415-RA;ID=Cnem034415-RA:cds_dup997
ctg40	maker	CDS	250280	250535	.	+	1	ID=Cnem034415-RA:cds_dup998;Parent=Cnem034415-RA
ctg40	maker	exon	246892	246923	.	+	.	Parent=Cnem034415-RA;ID=Cnem034415-RA:exon:642547
ctg40	maker	exon	250280	250535	.	+	.	Parent=Cnem034415-RA;ID=Cnem034415-RA:exon:642548
ctg40	maker	exon	245160	245233	.	+	.	Parent=Cnem034415-RA;ID=Cnem034415-RA:exon:642546
ctg40	maker	exon	243197	243344	.	+	.	Parent=Cnem034415-RA;ID=Cnem034415-RA:exon:642545
ctg40	maker	gene	215252	279103	.	-	.	Name=Cnem034414;ID=Cnem034414;Alias=maker-ctg40-snap-gene-0.24
ctg40	maker	mRNA	215252	279103	.	-	.	ID=Cnem034414-RA;_AED=0.11;Alias=maker-ctg40-snap-gene-0.24-mRNA-1;_QI=4|0.95|0.86|1|0.52|0.59|22|47|984;_eAED=0.11;Name=Cnem034414-RA;Parent=Cnem034414
ctg40	maker	CDS	240277	240469	.	-	1	Parent=Cnem034414-RA;ID=Cnem034414-RA:cds_dup1012
ctg40	maker	CDS	251242	251317	.	-	2	ID=Cnem034414-RA:cds_dup1007;Parent=Cnem034414-RA
ctg40	maker	CDS	216307	216349	.	-	0	ID=Cnem034414-RA:cds_dup1020;Parent=Cnem034414-RA
ctg40	maker	CDS	248371	248462	.	-	1	Parent=Cnem034414-RA;ID=Cnem034414-RA:cds_dup1008
ctg40	maker	CDS	238562	238681	.	-	0	ID=Cnem034414-RA:cds_dup1013;Parent=Cnem034414-RA
ctg40	maker	CDS	247811	247872	.	-	2	ID=Cnem034414-RA:cds_dup1009;Parent=Cnem034414-RA
ctg40	maker	CDS	226493	226563	.	-	1	Parent=Cnem034414-RA;ID=Cnem034414-RA:cds_dup1017
ctg40	maker	CDS	231522	231674	.	-	0	Parent=Cnem034414-RA;ID=Cnem034414-RA:cds_dup1015
ctg40	maker	CDS	245152	245400	.	-	0	Parent=Cnem034414-RA;ID=Cnem034414-RA:cds_dup1010
ctg40	maker	CDS	263714	263868	.	-	0	ID=Cnem034414-RA:cds_dup1003;Parent=Cnem034414-RA
ctg40	maker	CDS	273345	273454	.	-	2	ID=Cnem034414-RA:cds_dup1002;Parent=Cnem034414-RA
ctg40	maker	CDS	259579	259671	.	-	1	Parent=Cnem034414-RA;ID=Cnem034414-RA:cds_dup1004
ctg40	maker	CDS	252945	253065	.	-	0	ID=Cnem034414-RA:cds_dup1006;Parent=Cnem034414-RA
ctg40	maker	CDS	257885	258089	.	-	1	Parent=Cnem034414-RA;ID=Cnem034414-RA:cds_dup1005
ctg40	maker	CDS	243188	243432	.	-	0	ID=Cnem034414-RA:cds_dup1011;Parent=Cnem034414-RA
ctg40	maker	CDS	219175	219279	.	-	0	Parent=Cnem034414-RA;ID=Cnem034414-RA:cds_dup1019
ctg40	maker	CDS	279061	279099	.	-	0	ID=Cnem034414-RA:cds;Parent=Cnem034414-RA
ctg40	maker	CDS	275452	275659	.	-	0	Parent=Cnem034414-RA;ID=Cnem034414-RA:cds_dup1001
ctg40	maker	CDS	234990	235226	.	-	0	ID=Cnem034414-RA:cds_dup1014;Parent=Cnem034414-RA
ctg40	maker	CDS	215299	215393	.	-	2	ID=Cnem034414-RA:cds_dup1021;Parent=Cnem034414-RA
ctg40	maker	CDS	229232	229365	.	-	0	ID=Cnem034414-RA:cds_dup1016;Parent=Cnem034414-RA
ctg40	maker	CDS	223241	223389	.	-	2	ID=Cnem034414-RA:cds_dup1018;Parent=Cnem034414-RA
ctg40	maker	exon	279061	279103	.	-	.	Parent=Cnem034414-RA;ID=Cnem034414-RA:exon:642584
ctg40	maker	exon	263714	263868	.	-	.	Parent=Cnem034414-RA;ID=Cnem034414-RA:exon:642587
ctg40	maker	exon	219175	219279	.	-	.	Parent=Cnem034414-RA;ID=Cnem034414-RA:exon:642603
ctg40	maker	exon	257885	258089	.	-	.	Parent=Cnem034414-RA;ID=Cnem034414-RA:exon:642589
ctg40	maker	exon	240277	240469	.	-	.	Parent=Cnem034414-RA;ID=Cnem034414-RA:exon:642596
ctg40	maker	exon	247811	247872	.	-	.	Parent=Cnem034414-RA;ID=Cnem034414-RA:exon:642593
ctg40	maker	exon	273345	273454	.	-	.	Parent=Cnem034414-RA;ID=Cnem034414-RA:exon:642586
ctg40	maker	exon	226493	226563	.	-	.	ID=Cnem034414-RA:exon:642601;Parent=Cnem034414-RA
ctg40	maker	exon	248371	248462	.	-	.	ID=Cnem034414-RA:exon:642592;Parent=Cnem034414-RA
ctg40	maker	exon	245152	245400	.	-	.	Parent=Cnem034414-RA;ID=Cnem034414-RA:exon:642594
ctg40	maker	exon	234990	235226	.	-	.	ID=Cnem034414-RA:exon:642598;Parent=Cnem034414-RA
ctg40	maker	exon	251242	251317	.	-	.	ID=Cnem034414-RA:exon:642591;Parent=Cnem034414-RA
ctg40	maker	exon	252945	253065	.	-	.	Parent=Cnem034414-RA;ID=Cnem034414-RA:exon:642590
ctg40	maker	exon	215252	215393	.	-	.	Parent=Cnem034414-RA;ID=Cnem034414-RA:exon:642605
ctg40	maker	exon	229232	229365	.	-	.	Parent=Cnem034414-RA;ID=Cnem034414-RA:exon:642600
ctg40	maker	exon	231522	231674	.	-	.	Parent=Cnem034414-RA;ID=Cnem034414-RA:exon:642599
ctg40	maker	exon	238562	238681	.	-	.	Parent=Cnem034414-RA;ID=Cnem034414-RA:exon:642597
ctg40	maker	exon	259579	259671	.	-	.	Parent=Cnem034414-RA;ID=Cnem034414-RA:exon:642588
ctg40	maker	exon	223241	223389	.	-	.	Parent=Cnem034414-RA;ID=Cnem034414-RA:exon:642602
ctg40	maker	exon	243188	243432	.	-	.	Parent=Cnem034414-RA;ID=Cnem034414-RA:exon:642595
ctg40	maker	exon	216307	216349	.	-	.	Parent=Cnem034414-RA;ID=Cnem034414-RA:exon:642604
ctg40	maker	exon	275452	275659	.	-	.	Parent=Cnem034414-RA;ID=Cnem034414-RA:exon:642585
ctg40	maker	gene	480168	508723	.	+	.	Name=Cnem034431;ID=Cnem034431;Alias=maker-ctg40-snap-gene-1.169
ctg40	maker	mRNA	480168	508723	.	+	.	_QI=130|1|1|1|0.7|0.63|11|306|615;Alias=maker-ctg40-snap-gene-1.169-mRNA-1;_AED=0.07;ID=Cnem034431-RA;Parent=Cnem034431;Name=Cnem034431-RA;_eAED=0.07
ctg40	maker	CDS	496822	496905	.	+	0	Parent=Cnem034431-RA;ID=Cnem034431-RA:cds_dup1030
ctg40	maker	CDS	491819	491962	.	+	2	Parent=Cnem034431-RA;ID=Cnem034431-RA:cds_dup1028
ctg40	maker	CDS	493146	493324	.	+	2	ID=Cnem034431-RA:cds_dup1029;Parent=Cnem034431-RA
ctg40	maker	CDS	503674	503960	.	+	2	ID=Cnem034431-RA:cds_dup1032;Parent=Cnem034431-RA
ctg40	maker	CDS	504867	505011	.	+	0	Parent=Cnem034431-RA;ID=Cnem034431-RA:cds_dup1033
ctg40	maker	CDS	488050	488169	.	+	2	ID=Cnem034431-RA:cds_dup1026;Parent=Cnem034431-RA
ctg40	maker	CDS	499839	500088	.	+	0	Parent=Cnem034431-RA;ID=Cnem034431-RA:cds_dup1031
ctg40	maker	CDS	491060	491209	.	+	2	ID=Cnem034431-RA:cds_dup1027;Parent=Cnem034431-RA
ctg40	maker	CDS	508044	508417	.	+	2	Parent=Cnem034431-RA;ID=Cnem034431-RA:cds_dup1034
ctg40	maker	CDS	484164	484262	.	+	2	ID=Cnem034431-RA:cds_dup1025;Parent=Cnem034431-RA
ctg40	maker	CDS	480298	480313	.	+	0	Parent=Cnem034431-RA;ID=Cnem034431-RA:cds
ctg40	maker	exon	499839	500088	.	+	.	Parent=Cnem034431-RA;ID=Cnem034431-RA:exon:642653
ctg40	maker	exon	480168	480313	.	+	.	Parent=Cnem034431-RA;ID=Cnem034431-RA:exon:642646
ctg40	maker	exon	484164	484262	.	+	.	Parent=Cnem034431-RA;ID=Cnem034431-RA:exon:642647
ctg40	maker	exon	493146	493324	.	+	.	ID=Cnem034431-RA:exon:642651;Parent=Cnem034431-RA
ctg40	maker	exon	491819	491962	.	+	.	Parent=Cnem034431-RA;ID=Cnem034431-RA:exon:642650
ctg40	maker	exon	504867	505011	.	+	.	ID=Cnem034431-RA:exon:642655;Parent=Cnem034431-RA
ctg40	maker	exon	503674	503960	.	+	.	ID=Cnem034431-RA:exon:642654;Parent=Cnem034431-RA
ctg40	maker	exon	508044	508723	.	+	.	Parent=Cnem034431-RA;ID=Cnem034431-RA:exon:642656
ctg40	maker	exon	491060	491209	.	+	.	ID=Cnem034431-RA:exon:642649;Parent=Cnem034431-RA
ctg40	maker	exon	488050	488169	.	+	.	ID=Cnem034431-RA:exon:642648;Parent=Cnem034431-RA
ctg40	maker	exon	496822	496905	.	+	.	Parent=Cnem034431-RA;ID=Cnem034431-RA:exon:642652
ctg40	maker	gene	563160	565791	.	+	.	Name=Cnem034435;ID=Cnem034435;Alias=maker-ctg40-snap-gene-1.171
ctg40	maker	mRNA	563160	565791	.	+	.	_QI=1033|0|0.25|1|0|0.25|4|0|279;_AED=0.26;Alias=maker-ctg40-snap-gene-1.171-mRNA-1;ID=Cnem034435-RA;Parent=Cnem034435;Name=Cnem034435-RA;_eAED=0.34
ctg40	maker	CDS	564193	564448	.	+	0	ID=Cnem034435-RA:cds;Parent=Cnem034435-RA
ctg40	maker	CDS	565474	565791	.	+	0	Parent=Cnem034435-RA;ID=Cnem034435-RA:cds_dup1037
ctg40	maker	CDS	565100	565293	.	+	2	ID=Cnem034435-RA:cds_dup1035;Parent=Cnem034435-RA
ctg40	maker	CDS	565379	565450	.	+	0	Parent=Cnem034435-RA;ID=Cnem034435-RA:cds_dup1036
ctg40	maker	exon	563160	564448	.	+	.	ID=Cnem034435-RA:exon:642662;Parent=Cnem034435-RA
ctg40	maker	exon	565100	565293	.	+	.	ID=Cnem034435-RA:exon:642663;Parent=Cnem034435-RA
ctg40	maker	exon	565379	565450	.	+	.	Parent=Cnem034435-RA;ID=Cnem034435-RA:exon:642664
ctg40	maker	exon	565474	565791	.	+	.	Parent=Cnem034435-RA;ID=Cnem034435-RA:exon:642665
ctg40	maker	gene	450504	468645	.	-	.	Name=Cnem034430;Alias=maker-ctg40-augustus-gene-1.8;ID=Cnem034430
ctg40	maker	mRNA	450504	468645	.	-	.	_QI=0|0.92|0.92|0.92|1|1|14|1675|599;ID=Cnem034430-RA;_AED=0.02;Alias=maker-ctg40-augustus-gene-1.8-mRNA-1;Parent=Cnem034430;_eAED=0.02;Name=Cnem034430-RA
ctg40	maker	CDS	458978	459082	.	-	0	ID=Cnem034430-RA:cds_dup1048;Parent=Cnem034430-RA
ctg40	maker	CDS	465676	465980	.	-	2	Parent=Cnem034430-RA;ID=Cnem034430-RA:cds_dup1043
ctg40	maker	CDS	456336	456395	.	-	0	Parent=Cnem034430-RA;ID=Cnem034430-RA:cds_dup1050
ctg40	maker	CDS	461761	461969	.	-	0	ID=Cnem034430-RA:cds_dup1046;Parent=Cnem034430-RA
ctg40	maker	CDS	457956	458027	.	-	0	Parent=Cnem034430-RA;ID=Cnem034430-RA:cds_dup1049
ctg40	maker	CDS	460015	460105	.	-	1	Parent=Cnem034430-RA;ID=Cnem034430-RA:cds_dup1047
ctg40	maker	CDS	462921	462985	.	-	2	ID=Cnem034430-RA:cds_dup1045;Parent=Cnem034430-RA
ctg40	maker	CDS	455318	455375	.	-	0	ID=Cnem034430-RA:cds_dup1051;Parent=Cnem034430-RA
ctg40	maker	CDS	452179	452369	.	-	2	ID=Cnem034430-RA:cds_dup1054;Parent=Cnem034430-RA
ctg40	maker	CDS	454091	454212	.	-	2	ID=Cnem034430-RA:cds_dup1052;Parent=Cnem034430-RA
ctg40	maker	CDS	452677	453049	.	-	0	ID=Cnem034430-RA:cds_dup1053;Parent=Cnem034430-RA
ctg40	maker	CDS	468133	468183	.	-	2	Parent=Cnem034430-RA;ID=Cnem034430-RA:cds_dup1042
ctg40	maker	CDS	464429	464516	.	-	0	Parent=Cnem034430-RA;ID=Cnem034430-RA:cds_dup1044
ctg40	maker	CDS	468636	468645	.	-	0	Parent=Cnem034430-RA;ID=Cnem034430-RA:cds
ctg40	maker	exon	468133	468183	.	-	.	Parent=Cnem034430-RA;ID=Cnem034430-RA:exon:642688
ctg40	maker	exon	455318	455375	.	-	.	ID=Cnem034430-RA:exon:642697;Parent=Cnem034430-RA
ctg40	maker	exon	465676	465980	.	-	.	Parent=Cnem034430-RA;ID=Cnem034430-RA:exon:642689
ctg40	maker	exon	454091	454212	.	-	.	ID=Cnem034430-RA:exon:642698;Parent=Cnem034430-RA
ctg40	maker	exon	464429	464516	.	-	.	ID=Cnem034430-RA:exon:642690;Parent=Cnem034430-RA
ctg40	maker	exon	460015	460105	.	-	.	Parent=Cnem034430-RA;ID=Cnem034430-RA:exon:642693
ctg40	maker	exon	452677	453049	.	-	.	Parent=Cnem034430-RA;ID=Cnem034430-RA:exon:642699
ctg40	maker	exon	457956	458027	.	-	.	Parent=Cnem034430-RA;ID=Cnem034430-RA:exon:642695
ctg40	maker	exon	462921	462985	.	-	.	ID=Cnem034430-RA:exon:642691;Parent=Cnem034430-RA
ctg40	maker	exon	461761	461969	.	-	.	ID=Cnem034430-RA:exon:642692;Parent=Cnem034430-RA
ctg40	maker	exon	450504	452369	.	-	.	Parent=Cnem034430-RA;ID=Cnem034430-RA:exon:642700
ctg40	maker	exon	468636	468645	.	-	.	Parent=Cnem034430-RA;ID=Cnem034430-RA:exon:642687
ctg40	maker	exon	456336	456395	.	-	.	Parent=Cnem034430-RA;ID=Cnem034430-RA:exon:642696
[truncated: 490,425 more rows]
